# Supplementary material for: Coupling of enamides with alkynes or arynes for synthesis of substituted pyridines and isoquinolines via amide activation
Source: Royal Society of Chemistry journal article supplement (doi:10.1039/c2cc33768a), 2012-01-01

*Supporting Information For:*

**Coupling of Enamides with Alkynes or Arynes for Synthesis of Substituted  
Pyridines and Isoquinolines *via* Amide Activation**

Mi-Na Zhao, Zhi-Hui Ren, Yao-Yu Wang and Zheng-Hui Guan\*

*Key Laboratory of Synthetic and Natural Functional Molecule Chemistry of Ministry of  
Education, Department of Chemistry & Materials Science, Northwest University, Xi'an  
710069, P. R. China*

*E-mail: [guanzzh@nwu.edu.cn](mailto:guanzzh@nwu.edu.cn)*

**CONTENTS**

|                                                                             |                |
|-----------------------------------------------------------------------------|----------------|
| <b>1. General Information</b>                                               | <b>S2</b>      |
| <b>2. Optimization of Reaction Conditions</b>                               | <b>S2</b>      |
| <b>3. Typical procedure for preparation of Enamides</b>                     | <b>S3</b>      |
| <b>4. Typical procedure for the synthesis of pyridines</b>                  | <b>S3</b>      |
| <b>5. Typical procedure for the synthesis of isoquinolines</b>              | <b>S4</b>      |
| <b>6. Spectroscopic data for pyridines and isoquinolines</b>                | <b>S4–S10</b>  |
| <b>7. The X-ray data and crystal structure of pyridine 3d</b>               | <b>S10–S20</b> |
| <b>8. Appendix (copies of <sup>1</sup>H and <sup>13</sup>C NMR spectra)</b> | <b>S21–S66</b> |

## 1. General Information

Column chromatography was carried out on silica gel.  $^1\text{H}$  NMR spectra were recorded on 400 MHz in  $\text{CDCl}_3$  and  $^{13}\text{C}$  NMR spectra were recorded on 100 MHz in  $\text{CDCl}_3$ . The following abbreviations were used to explain multiplicities: s = singlet, d = doublet, t = triplet, q = quartet, m = multiplet. All new products were further characterized by HRMS; copies of their  $^1\text{H}$  NMR and  $^{13}\text{C}$  NMR spectra are provided. Unless otherwise stated, all reagents and solvents were purchased from commercial suppliers and used without further purification. The ketoximes were in all cases prepared from the corresponding ketones according to following literature:

Zhao, H.; Vandebossche, C. P.; Koenig, S. G.; Singh, S. P.; Bakale, R. P. *Org. Lett.* **2008**, *10*, 505-507.

## 2. Optimization of Reaction Conditions

**Table S1.** Optimization of reaction conditions.<sup>a</sup>

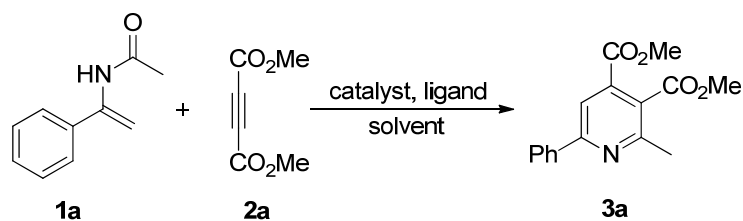

| entry | catalyst          | ligand               | solvent     | T (°C) <sup>b</sup> | yield (%) |
|-------|-------------------|----------------------|-------------|---------------------|-----------|
| 1     | CuI               |                      | DMSO        | 120                 | 23        |
| 2     | CuI               |                      | DMF         | 120                 | 31        |
| 3     | CuI               |                      | DCE         | 120                 | 40        |
| 4     | CuI               |                      | THF         | 120                 | 68        |
| 5     | CuI               |                      | 1,4-dioxane | 120                 | 70        |
| 6     | CuBr              |                      | 1,4-dioxane | 120                 | 54        |
| 7     | CuCl              |                      | 1,4-dioxane | 120                 | 38        |
| 8     | Cu <sub>2</sub> O |                      | 1,4-dioxane | 120                 | 25        |
| 9     | CuI               |                      | 1,4-dioxane | 140                 | 76        |
| 10    | CuI               | glycine              | 1,4-dioxane | 140                 | 88        |
| 11    | CuI               | N-methyl glycine     | 1,4-dioxane | 140                 | 70        |
| 12    | CuI               | N,N-dimethyl glycine | 1,4-dioxane | 140                 | 66        |
| 13    | CuI               | Phenanthroline       | 1,4-dioxane | 140                 | 67        |
| 14    | CuI               | L-proline            | 1,4-dioxane | 140                 | 62        |
| 15    | CuI               | 2,2'-dipyridine      | 1,4-dioxane | 140                 | 68        |

<sup>a</sup> Reaction conditions: **1a** (0.2 mmol), **2a** (0.3 mmol), catalysts (10 mol%), and ligand (20 mol%) in solvent (3 mL) for 30 h. Isolated yields. <sup>b</sup> oil bath temperature.

### 3. Typical procedure for preparation of Enamides

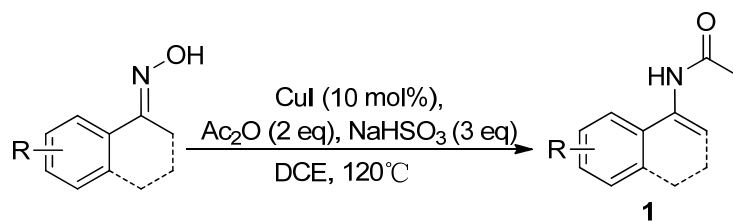

The mixture of ketoxime (5 mmol), acetic anhydride (10 mmol, 1.02 g), NaHSO<sub>3</sub> (1.5 mmol, 780.5 mg) and CuI (10 mol%, 95.5 mg) was stirred in 1,2-dichloroethane (DCE, 20 mL) at 120 °C (oil bath temperature) under Ar. After completion of the reaction (detected by TLC), the reaction mixture was cooled to room temperature, diluted with EtOAc (30 mL) and washed with NaOH (2N, 20 mL) and brine (20 mL). The organic layer was dried over by anhydrous Na<sub>2</sub>SO<sub>4</sub> and evaporated in vacuo. The desired enamide **1** was obtained after purification by flash chromatography on silica gel with hexane/ethyl acetate as the eluent.

### 4. Typical procedure for the synthesis of pyridines

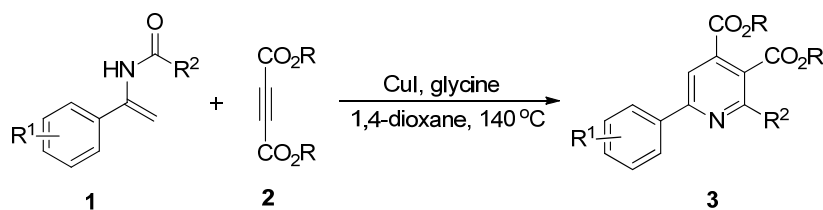

In a 25 mL round bottom flask, the enamide **1** (0.3 mmol), alkyne **2** (0.45 mmol), CuI (10 mol%, 5.7 mg) and glycine (20 mol%, 4.5 mg) was stirred in 1,4-dioxane (3 mL) at 140 °C (oil bath temperature) for 30 h. After completion of the reaction (detected by TLC), the reaction mixture was cooled to room temperature, extracted with ethyl acetate (20 mL) and washed with dilute NH<sub>3</sub>·H<sub>2</sub>O (5 mL) and brine (20 mL). The organic layer was dried over by anhydrous Na<sub>2</sub>SO<sub>4</sub> and evaporated in vacuo. The desired pyridine was obtained after purification by flash chromatography on silica gel with hexane/ethyl acetate (10/1) as the eluent.

## 5. Typical procedure for the synthesis of isoquinolines

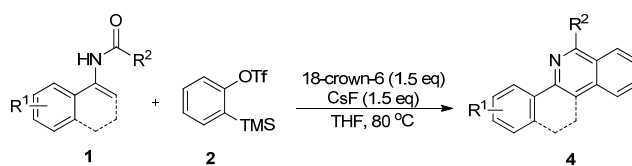

In a 25 mL round bottom flask, the enamide **1** (0.2 mmol), benzyne **2c** (0.3 mmol), CsF (0.3 mmol, 45.6 mg) and 18-crown-6 (0.3 mmol, 79.2 mg) was stirred in THF (3 mL) at 80 °C (oil bath temperature) under argon atmosphere for 24 h. After completion of the reaction (detected by TLC), the reaction mixture was cooled to room temperature, extracted with ethyl acetate (20 mL) and washed with brine (20 mL). The organic layers were dried over by anhydrous Na<sub>2</sub>SO<sub>4</sub> and evaporated in vacuo. The desired isoquinoline was obtained after purification by flash chromatography on silica gel with hexane/ethyl acetate (40/1) as the eluent.

## 6. Spectroscopic data for pyridines and isoquinolines

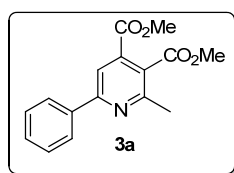

**3a**: yellow solid. <sup>1</sup>H NMR (400 MHz, CDCl<sub>3</sub>) δ 8.03 (d, *J* = 8.0 Hz, 3H), 7.48-7.45 (m, 3H), 3.96 (s, 3H), 3.94 (s, 3H), 2.67 (s, 3H). <sup>13</sup>C NMR (100 MHz, CDCl<sub>3</sub>) δ 168.7, 165.4, 158.2, 156.4, 137.8, 136.7, 129.8, 128.8, 127.1, 126.4, 116.9, 53.0, 52.8, 22.8. HRMS Calcd (ESI) *m/z* for C<sub>16</sub>H<sub>15</sub>NNaO<sub>4</sub>: [M+Na]<sup>+</sup> 308.0893. Found: 308.0901.

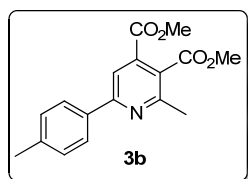

**3b**: pale yellow solid. <sup>1</sup>H NMR (400 MHz, CDCl<sub>3</sub>) δ 7.99 (s, 1H), 7.94 (d, *J* = 8.0 Hz, 2H), 7.27 (d, *J* = 7.6 Hz, 2H), 3.95 (s, 3H), 3.93 (s, 3H), 2.66 (s, 3H), 2.39 (s, 3H). <sup>13</sup>C NMR (100 MHz, CDCl<sub>3</sub>) δ 168.8, 165.5, 158.1, 156.3, 140.0, 136.7, 135.0, 129.6, 127.0, 126.0, 116.5, 53.0, 52.8, 22.8, 21.3. HRMS Calcd (ESI) *m/z* for C<sub>17</sub>H<sub>17</sub>NNaO<sub>4</sub>: [M+Na]<sup>+</sup> 322.1050. Found: 322.1053.

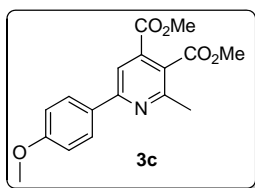

**3c:** yellow solid.  $^1\text{H}$  NMR (400 MHz,  $\text{CDCl}_3$ )  $\delta$  8.02 (d,  $J = 9.2$  Hz, 2H), 7.97 (s, 1H), 7.00 (d,  $J = 8.4$  Hz, 2H), 3.97 (s, 3H), 3.95 (s, 3H), 3.87 (s, 3H), 2.67 (s, 3H).  $^{13}\text{C}$  NMR (100 MHz,  $\text{CDCl}_3$ )  $\delta$  168.8, 165.6, 161.1, 157.8, 156.2, 136.8, 130.4, 128.5, 125.5, 116.0, 114.2, 55.3, 53.0, 52.8, 22.8. HRMS Calcd (ESI)  $m/z$  for  $\text{C}_{17}\text{H}_{18}\text{NO}_5$ :  $[\text{M}+\text{H}]^+$  316.1179. Found: 316.1180.

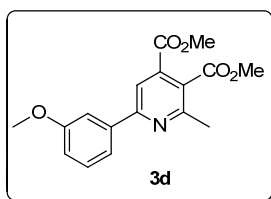

**3d:** yellow solid.  $^1\text{H}$  NMR (400 MHz,  $\text{CDCl}_3$ )  $\delta$  8.03 (s, 1H), 7.63-7.59 (m, 2H), 7.42-7.38 (t,  $J = 8.0$  Hz, 1H), 7.02-6.99 (m, 1H), 3.98 (s, 3H), 3.96 (s, 3H), 3.90 (s, 3H), 2.69 (s, 3H).  $^{13}\text{C}$  NMR (100 MHz,  $\text{CDCl}_3$ )  $\delta$  168.7, 165.4, 160.1, 157.9, 156.3, 139.3, 136.7, 129.8, 126.5, 119.5, 117.0, 115.6, 112.4, 55.4, 53.0, 52.8, 22.8. HRMS Calcd (ESI)  $m/z$  for  $\text{C}_{17}\text{H}_{18}\text{NO}_5$ :  $[\text{M}+\text{H}]^+$  316.1179. Found: 316.1177.

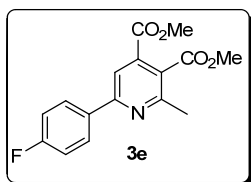

**3e:** white solid.  $^1\text{H}$  NMR (400 MHz,  $\text{CDCl}_3$ )  $\delta$  8.04-8.00 (m, 2H), 7.96 (s, 1H), 7.16-7.12 (t,  $J = 8.4$  Hz, 2H), 3.95 (s, 3H), 3.93 (s, 3H), 2.64 (s, 3H).  $^{13}\text{C}$  NMR (100 MHz,  $\text{CDCl}_3$ )  $\delta$  168.6, 165.3, 163.9 (d,  $J_{\text{CF}} = 248.6$  Hz), 157.0, 156.4, 136.8, 134.0, 129.0 (d,  $J_{\text{CF}} = 8.6$  Hz), 126.4, 116.5, 115.8 (d,  $J_{\text{CF}} = 21.9$  Hz), 53.0, 52.8, 22.8. HRMS Calcd (ESI)  $m/z$  for  $\text{C}_{16}\text{H}_{14}\text{FNNaO}_4$ :  $[\text{M}+\text{Na}]^+$  326.0799. Found: 326.0792.

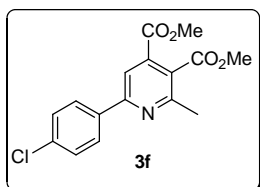

**3f:** white solid.  $^1\text{H}$  NMR (400 MHz,  $\text{CDCl}_3$ )  $\delta$  7.98-7.96 (m, 3H), 7.43 (d,  $J = 8.4$  Hz, 2H), 3.95 (s, 3H), 3.93 (s, 3H), 2.64 (s, 3H).  $^{13}\text{C}$  NMR (100 MHz,  $\text{CDCl}_3$ )  $\delta$  168.6, 165.2, 156.8, 156.5, 136.8, 136.2, 136.0, 129.0, 128.4, 126.7, 116.6, 53.1, 52.9, 22.8. HRMS Calcd (ESI)  $m/z$  for  $\text{C}_{16}\text{H}_{14}\text{ClNNaO}_4$ :  $[\text{M}+\text{Na}]^+$  342.0504. Found: 342.0505.

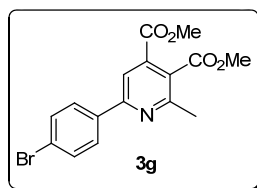

**3g:** white solid.  $^1\text{H}$  NMR (400 MHz,  $\text{CDCl}_3$ )  $\delta$  7.97 (s, 1H), 7.90 (d,  $J = 8.4$  Hz, 2H), 7.58 (d,  $J = 8.8$  Hz, 2H), 3.95 (s, 3H), 3.92 (s, 3H), 2.64 (s, 3H).  $^{13}\text{C}$  NMR (100 MHz,  $\text{CDCl}_3$ )  $\delta$  168.5, 165.2, 156.8, 156.5, 136.8, 136.6, 132.0, 128.6, 126.8, 124.4, 116.5, 53.1, 52.9, 22.8. HRMS Calcd (ESI)  $m/z$  for  $\text{C}_{16}\text{H}_{14}\text{BrNNaO}_4$ :  $[\text{M}+\text{Na}]^+$  385.9998. Found: 385.9988.

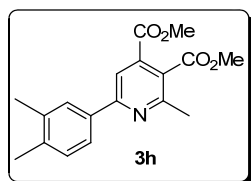

**3h:** yellow solid.  $^1\text{H}$  NMR (400 MHz,  $\text{CDCl}_3$ )  $\delta$  7.98 (s, 1H), 7.83 (s, 1H), 7.75 (d,  $J = 8.0$  Hz, 1H), 7.22 (d,  $J = 8.0$  Hz, 1H), 3.95 (s, 3H), 3.93 (s, 3H), 2.66 (s, 3H), 2.34 (s, 3H), 2.30 (s, 3H).  $^{13}\text{C}$  NMR (100 MHz,  $\text{CDCl}_3$ )  $\delta$  168.8, 165.6, 158.3, 156.2, 138.7, 137.1, 136.7, 135.4, 130.1, 128.2, 125.9, 124.5, 116.5, 53.0, 52.8, 22.8, 19.9, 19.7. HRMS Calcd (ESI)  $m/z$  for  $\text{C}_{18}\text{H}_{19}\text{NNaO}_4$ :  $[\text{M}+\text{Na}]^+$  336.1206. Found: 336.1195.

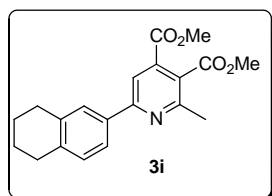

**3i:** yellow solid.  $^1\text{H}$  NMR (400 MHz,  $\text{CDCl}_3$ )  $\delta$  7.98 (s, 1H), 7.74 (d,  $J = 10.0$  Hz, 2H), 7.16 (d,  $J = 8.0$  Hz, 1H), 3.95 (s, 3H), 3.94 (s, 3H), 2.85-2.80 (m, 4H), 2.66 (s, 3H), 1.83-1.81 (m, 4H).  $^{13}\text{C}$  NMR (100 MHz,  $\text{CDCl}_3$ )  $\delta$  168.8, 165.6, 158.4, 156.2, 139.3, 137.7, 136.7, 135.0, 129.6, 127.7, 125.9, 124.1, 116.5, 53.0, 52.8, 29.5, 29.3, 23.1, 23.0, 22.8. HRMS Calcd (ESI)  $m/z$  for  $\text{C}_{20}\text{H}_{21}\text{NNaO}_4$ :  $[\text{M}+\text{Na}]^+$  362.1363. Found: 362.1364.

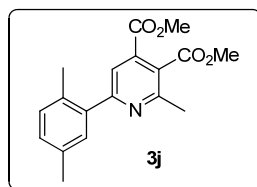

**3j:** brown oil.  $^1\text{H}$  NMR (400 MHz,  $\text{CDCl}_3$ )  $\delta$  7.70 (s, 1H), 7.19-7.12 (m, 3H), 3.97 (s, 3H), 3.91 (s, 3H), 2.65 (s, 3H), 2.34 (s, 3H), 2.29 (s, 3H).  $^{13}\text{C}$  NMR (100 MHz,  $\text{CDCl}_3$ )  $\delta$  168.8, 165.3, 161.2, 155.8, 138.7, 135.9, 135.5, 132.6, 130.9, 130.1, 129.6, 126.1, 120.5, 53.0, 52.9, 22.6, 20.9, 19.7. HRMS Calcd (ESI)  $m/z$  for  $\text{C}_{18}\text{H}_{20}\text{NO}_4$ :  $[\text{M}+\text{H}]^+$

314.1387. Found: 314.1381.

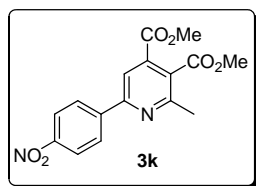

**3k**: yellow solid. <sup>1</sup>H NMR (400 MHz, CDCl<sub>3</sub>) δ 8.33 (d, *J* = 8.0 Hz, 2H), 8.24 (d, *J* = 8.4 Hz, 2H), 8.12 (s, 1H), 3.99 (s, 3H), 3.98 (s, 3H), 2.70 (s, 3H). <sup>13</sup>C NMR (100 MHz, CDCl<sub>3</sub>) δ 168.2, 164.8, 157.0, 155.3, 148.5, 143.5, 136.9, 128.0, 127.9, 124.0, 117.5, 53.2, 53.0, 22.7. HRMS Calcd (ESI) *m/z* for C<sub>16</sub>H<sub>14</sub>N<sub>2</sub>NaO<sub>6</sub>: [M+Na]<sup>+</sup> 353.0744. Found: 353.0738.

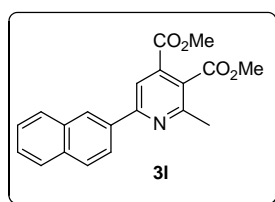

**3l**: yellow solid. <sup>1</sup>H NMR (400 MHz, CDCl<sub>3</sub>) δ 8.52 (s, 1H), 8.18-8.16 (m, 2H), 7.96-7.92 (m, 2H), 7.87-7.85 (m, 1H), 7.52-7.50 (m, 2H), 3.98 (s, 3H), 3.96 (s, 3H), 2.72 (s, 3H). <sup>13</sup>C NMR (100 MHz, CDCl<sub>3</sub>) δ 168.7, 165.4, 158.0, 156.5, 136.8, 135.1, 134.0, 133.3, 128.8, 128.6, 127.7, 126.9, 126.9, 126.4, 126.4, 124.3, 117.0, 53.0, 52.8, 22.9. HRMS Calcd (ESI) *m/z* for C<sub>20</sub>H<sub>17</sub>NNaO<sub>4</sub>: [M+Na]<sup>+</sup> 358.1050. Found: 358.1051.

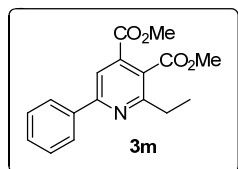

**3m**: yellow solid. <sup>1</sup>H NMR (400 MHz, CDCl<sub>3</sub>) δ 8.08-8.04 (m, 3H), 7.47-7.45 (m, 3H), 3.95 (s, 3H), 3.93 (s, 3H), 2.92-2.90 (m, 2H), 1.39-1.35 (t, *J* = 7.6 Hz, 3H). <sup>13</sup>C NMR (100 MHz, CDCl<sub>3</sub>) δ 168.8, 165.4, 160.8, 158.1, 138.0, 136.5, 129.7, 128.8, 127.1, 126.1, 116.7, 53.0, 52.8, 29.3, 13.5. HRMS Calcd (ESI) *m/z* for C<sub>17</sub>H<sub>17</sub>NNaO<sub>4</sub>: [M+Na]<sup>+</sup> 322.1050. Found: 322.1045.

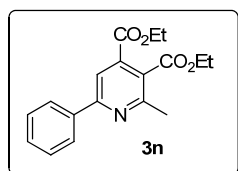

**3n**: yellow solid. <sup>1</sup>H NMR (400 MHz, CDCl<sub>3</sub>) δ 8.04 (d, *J* = 9.2 Hz, 3H), 7.49 (d, *J* = 7.6 Hz, 3H), 4.46-4.41 (m, 4H), 2.70 (s, 3H), 1.43-1.39 (m, 6H). <sup>13</sup>C NMR (100 MHz, CDCl<sub>3</sub>) δ 168.2, 165.0, 158.0, 156.2, 137.9, 137.1, 129.6, 128.8, 127.1, 126.6, 116.9,

62.1, 61.8, 22.7, 14.0, 14.0. HRMS Calcd (ESI)  $m/z$  for  $C_{18}H_{19}NNaO_4$ :  $[M+Na]^+$  336.1206. Found: 336.1211.

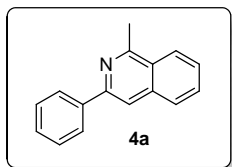

**4a:** pale yellow solid.  $^1H$  NMR (400 MHz,  $CDCl_3$ )  $\delta$  8.10 (d,  $J = 7.2$  Hz, 2H), 8.04 (d,  $J = 8.0$  Hz, 1H), 7.85 (s, 1H), 7.77 (d,  $J = 8.0$  Hz, 1H), 7.60-7.56 (m, 1H), 7.50-7.44 (m, 3H), 7.36 (d,  $J = 6.8$  Hz, 1H), 2.98 (s, 3H).  $^{13}C$  NMR (100 MHz,  $CDCl_3$ )  $\delta$  158.5, 149.8, 139.7, 136.6, 129.9, 128.6, 128.2, 127.5, 126.9, 126.7, 126.4, 125.5, 115.1, 22.6. HRMS Calcd (ESI)  $m/z$  for  $C_{16}H_{14}N$ :  $[M+H]^+$  220.1121. Found: 220.1122.

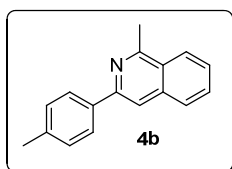

**4b:** yellow solid.  $^1H$  NMR (400 MHz,  $CDCl_3$ )  $\delta$  8.09 (d,  $J = 8.8$  Hz, 1H), 8.03 (d,  $J = 8.0$  Hz, 2H), 7.87 (s, 1H), 7.81 (d,  $J = 8.4$  Hz, 1H), 7.65-7.61 (m, 1H), 7.54-7.50 (m, 1H), 7.29 (d,  $J = 8.0$  Hz, 2H), 3.02 (s, 3H), 2.41 (s, 3H).  $^{13}C$  NMR (100 MHz,  $CDCl_3$ )  $\delta$  158.4, 149.9, 138.1, 136.9, 136.7, 129.9, 129.4, 127.5, 126.8, 126.5, 126.4, 125.6, 114.7, 22.6, 21.2. HRMS Calcd (ESI)  $m/z$  for  $C_{17}H_{16}N$ :  $[M+H]^+$  234.1277. Found: 234.1276.

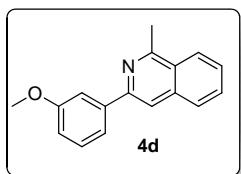

**4d:** pale yellow solid.  $^1H$  NMR (400 MHz,  $CDCl_3$ )  $\delta$  8.09 (d,  $J = 8.8$  Hz, 1H), 7.88 (s, 1H), 7.82 (d,  $J = 7.6$  Hz, 1H), 7.72 (s, 1H), 7.69-7.61 (m, 2H), 7.55-7.53 (m, 1H), 7.40-7.37 (m, 1H), 6.94 (d,  $J = 6.8$  Hz, 1H), 3.90 (s, 3H), 3.01 (s, 3H).  $^{13}C$  NMR (100 MHz,  $CDCl_3$ )  $\delta$  160.0, 158.5, 149.7, 141.3, 136.6, 130.0, 129.6, 127.6, 126.8, 126.6, 125.6, 119.3, 115.3, 114.1, 112.2, 55.3, 22.6. HRMS Calcd (ESI)  $m/z$  for  $C_{17}H_{16}NO$ :  $[M+H]^+$  250.1226. Found: 250.1230.

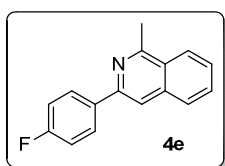

**4e:** white solid.  $^1H$  NMR (400 MHz,  $CDCl_3$ )  $\delta$  8.12-8.08 (m, 3H), 7.83 (s, 1H), 7.80



(s, 1H), 7.66-7.63 (m, 1H), 7.56-7.53 (m, 1H), 7.19-7.14 (m, 2H), 3.01 (s, 3H).  $^{13}\text{C}$  NMR (100 MHz,  $\text{CDCl}_3$ )  $\delta$  163.1 (d,  $J_{\text{CF}} = 245.9$  Hz), 158.6, 148.9, 136.6, 135.9, 130.1, 128.6 (d,  $J_{\text{CF}} = 7.6$  Hz), 127.5, 126.8, 126.4, 125.6, 115.5 (d,  $J_{\text{CF}} = 21.3$  Hz), 114.8, 22.6. HRMS Calcd (ESI)  $m/z$  for  $\text{C}_{16}\text{H}_{13}\text{NF}$ :  $[\text{M}+\text{H}]^+$  238.1027. Found: 238.1029.

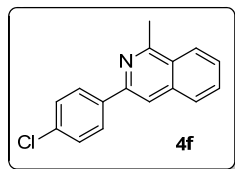

**4f**: pale yellow solid.  $^1\text{H}$  NMR (400 MHz,  $\text{CDCl}_3$ )  $\delta$  8.10-8.06 (m, 3H), 7.86 (s, 1H), 7.81 (d,  $J = 7.6$  Hz, 1H), 7.67-7.63 (m, 1H), 7.57-7.56 (m, 1H), 7.44 (d,  $J = 8.4$  Hz, 2H), 3.00 (s, 3H).  $^{13}\text{C}$  NMR (100 MHz,  $\text{CDCl}_3$ )  $\delta$  158.7, 148.6, 138.2, 136.6, 134.2, 130.1, 128.8, 128.1, 127.6, 127.0, 126.6, 125.6, 115.1, 22.6. HRMS Calcd (ESI)  $m/z$  for  $\text{C}_{16}\text{H}_{13}\text{NCl}$ :  $[\text{M}+\text{H}]^+$  254.0731. Found: 254.0731.

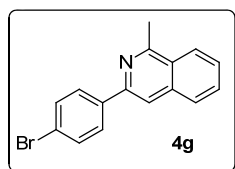

**4g**: yellow oil.  $^1\text{H}$  NMR (400 MHz,  $\text{CDCl}_3$ )  $\delta$  8.07 (d,  $J = 8.4$  Hz, 1H), 7.98 (d,  $J = 7.6$  Hz, 2H), 7.84 (s, 1H), 7.79 (d,  $J = 8.0$  Hz, 1H), 7.65-7.61 (m, 1H), 7.59-7.54 (m, 3H), 2.99 (s, 3H).  $^{13}\text{C}$  NMR (100 MHz,  $\text{CDCl}_3$ )  $\delta$  158.7, 148.6, 138.6, 136.5, 131.7, 130.1, 128.4, 127.6, 127.0, 126.6, 125.6, 122.6, 115.0, 22.6. HRMS Calcd (ESI)  $m/z$  for  $\text{C}_{16}\text{H}_{13}\text{NBr}$ :  $[\text{M}+\text{H}]^+$  298.0226. Found: 298.0226.

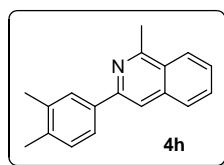

**4h**: yellow solid.  $^1\text{H}$  NMR (400 MHz,  $\text{CDCl}_3$ )  $\delta$  8.09 (d,  $J = 8.4$  Hz, 1H), 7.95 (s, 1H), 7.88-7.81 (m, 3H), 7.65-7.62 (m, 1H), 7.55-7.51 (m, 1H), 7.26 (d,  $J = 8.0$  Hz, 1H), 3.03 (s, 3H), 2.38 (s, 3H), 2.33 (s, 3H).  $^{13}\text{C}$  NMR (100 MHz,  $\text{CDCl}_3$ )  $\delta$  158.3, 150.1, 137.3, 136.8, 136.7, 130.0, 129.9, 128.1, 127.5, 126.4, 126.4, 125.6, 124.2, 114.7, 22.6, 20.0, 19.6. HRMS Calcd (ESI)  $m/z$  for  $\text{C}_{18}\text{H}_{18}\text{N}$ :  $[\text{M}+\text{H}]^+$  248.1434. Found: 248.1439.

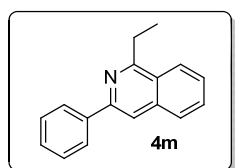

**4m:** colorless oil.  $^1\text{H}$  NMR (400 MHz,  $\text{CDCl}_3$ )  $\delta$  8.19-8.13 (m, 3H), 7.90 (s, 1H), 7.83 (d,  $J = 8.0$  Hz, 1H), 7.64-7.61 (t,  $J = 7.2$  Hz, 1H), 7.55-7.48 (m, 3H), 7.41-7.39 (m, 1H), 3.42-3.36 (m, 2H), 1.54-1.51 (t,  $J = 7.6$  Hz, 3H).  $^{13}\text{C}$  NMR (100 MHz,  $\text{CDCl}_3$ )  $\delta$  162.7, 149.7, 139.9, 137.0, 129.7, 128.7, 128.2, 127.8, 126.9, 126.6, 125.8, 125.1, 114.9, 28.5, 13.3. HRMS Calcd (ESI)  $m/z$  for  $\text{C}_{17}\text{H}_{16}\text{N}$ :  $[\text{M}+\text{H}]^+$  234.1277. Found: 234.1278.

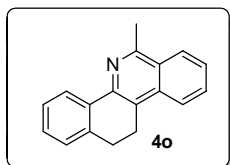

**4o:** white solid.  $^1\text{H}$  NMR (400 MHz,  $\text{CDCl}_3$ )  $\delta$  8.51 (d,  $J = 7.6$  Hz, 1H), 8.16 (d,  $J = 8.8$  Hz, 1H), 8.06 (d,  $J = 8.4$  Hz, 1H), 7.73-7.70 (m, 1H), 7.59-7.55 (t,  $J = 7.6$  Hz, 1H), 7.46-7.43 (m, 1H), 7.36-7.28 (m, 2H), 3.32-3.28 (t,  $J = 7.2$  Hz, 2H), 3.09-3.06 (m, 5H).  $^{13}\text{C}$  NMR (100 MHz,  $\text{CDCl}_3$ )  $\delta$  156.6, 144.2, 136.9, 135.4, 134.6, 129.7, 128.0, 127.3, 127.0, 126.6, 126.2, 125.9, 125.0, 123.1, 123.0, 27.8, 22.7, 22.7. HRMS Calcd (ESI)  $m/z$  for  $\text{C}_{18}\text{H}_{16}\text{N}$ :  $[\text{M}+\text{H}]^+$  246.1277. Found: 246.1284.

## 7. The X-ray data and crystal structure of pyridine **3d**

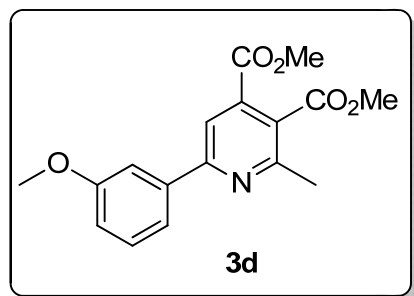

data\_xb5259

```
_audit_creation_method      SHELXL-97
_chemical_name_systematic
;
?
;
_chemical_name_common       ?
_chemical_melting_point     ?
_chemical_formula_moiety    ?
_chemical_formula_sum
```

```
'C17 H17 N O5'  
_chemical_formula_weight      315.32  
  
loop_  
  _atom_type_symbol  
  _atom_type_description  
  _atom_type_scatter_dispersion_real  
  _atom_type_scatter_dispersion_imag  
  _atom_type_scatter_source  
'C' 'C' 0.0033 0.0016  
'International Tables Vol C Tables 4.2.6.8 and 6.1.1.4'  
'H' 'H' 0.0000 0.0000  
'International Tables Vol C Tables 4.2.6.8 and 6.1.1.4'  
'N' 'N' 0.0061 0.0033  
'International Tables Vol C Tables 4.2.6.8 and 6.1.1.4'  
'O' 'O' 0.0106 0.0060  
'International Tables Vol C Tables 4.2.6.8 and 6.1.1.4'  
  
_symmetry_cell_setting      Triclinic  
_symmetry_space_group_name_H-M  P-1  
  
loop_  
  _symmetry_equiv_pos_as_xyz  
'x, y, z'  
'-x, -y, -z'  
  
_cell_length_a      8.158(2)  
_cell_length_b      8.3923(18)  
_cell_length_c      11.774(2)  
_cell_angle_alpha    73.710(3)  
_cell_angle_beta     86.066(3)  
_cell_angle_gamma    86.367(3)  
_cell_volume         771.1(3)  
_cell_formula_units_Z 2  
_cell_measurement_temperature 296(2)  
_cell_measurement_reflns_used 921  
_cell_measurement_theta_min 2.53  
_cell_measurement_theta_max 25.96  
  
_exptl_crystal_description ?  
_exptl_crystal_colour ?  
_exptl_crystal_size_max 0.37  
_exptl_crystal_size_mid 0.27  
_exptl_crystal_size_min 0.13
```

```
_exptl_crystal_density_meas      ?
_exptl_crystal_density_diffn    1.358
_exptl_crystal_density_method   'not measured'
_exptl_crystal_F_000            332
_exptl_absorpt_coefficient_mu    0.101
_exptl_absorpt_correction_type   none
_exptl_absorpt_correction_T_min 0.9639
_exptl_absorpt_correction_T_max 0.9868
_exptl_absorpt_process_details  ?

_exptl_special_details
;
?
;

_diffn_ambient_temperature      296(2)
_diffn_radiation_wavelength     0.71073
_diffn_radiation_type           MoK\alpha
_diffn_radiation_source         'fine-focus sealed tube'
_diffn_radiation_monochromator  graphite
_diffn_measurement_device_type  'Bruker APEX-II CCD'
_diffn_measurement_method      '\f and \w scans'
_diffn_detector_area_resol_mean ?
_diffn_reflns_number           3921
_diffn_reflns_av_R_equivalents 0.0191
_diffn_reflns_av_sigmaI/netI   0.0429
_diffn_reflns_limit_h_min      -9
_diffn_reflns_limit_h_max      4
_diffn_reflns_limit_k_min      -10
_diffn_reflns_limit_k_max      9
_diffn_reflns_limit_l_min      -13
_diffn_reflns_limit_l_max      14
_diffn_reflns_theta_min        1.80
_diffn_reflns_theta_max        25.09
_reflns_number_total            2725
_reflns_number_gt               1920
_reflns_threshold_expression    >2sigma(I)

_computing_data_collection      'Bruker APEX2'
_computing_cell_refinement     'Bruker SAINT'
_computing_data_reduction      'Bruker SAINT'
_computing_structure_solution  'SHELXS-97 (Sheldrick, 2008)'
_computing_structure_refinement 'SHELXL-97 (Sheldrick, 2008)'
_computing_molecular_graphics  'Bruker SHELXTL'
```

```
_computing_publication_material 'Bruker SHELXTL'

_refine_special_details
;
Refinement of  $F^2$  against ALL reflections. The weighted R-factor wR and
goodness of fit S are based on  $F^2$ , conventional R-factors R are based
on F, with F set to zero for negative  $F^2$ . The threshold expression of
 $F^2 > 2\sigma(F^2)$  is used only for calculating R-factors(gt) etc. and is
not relevant to the choice of reflections for refinement. R-factors based
on  $F^2$  are statistically about twice as large as those based on F, and R-
factors based on ALL data will be even larger.
;

_refine_ls_structure_factor_coef Fsqd
_refine_ls_matrix_type full
_refine_ls_weighting_scheme calc
_refine_ls_weighting_details
'calc w=1/[\s^2 (Fo^2)+(0.1138P)^2+0.0158P] where P=(Fo^2+2Fc^2)/3'
_atom_sites_solution_primary direct
_atom_sites_solution_secondary difmap
_atom_sites_solution_hydrogens geom
_refine_ls_hydrogen_treatment mixed
_refine_ls_extinction_method none
_refine_ls_extinction_coef ?
_refine_ls_number_reflns 2725
_refine_ls_number_parameters 212
_refine_ls_number_restraints 0
_refine_ls_R_factor_all 0.0770
_refine_ls_R_factor_gt 0.0533
_refine_ls_wR_factor_ref 0.1920
_refine_ls_wR_factor_gt 0.1624
_refine_ls_goodness_of_fit_ref 1.053
_refine_ls_restrained_S_all 1.053
_refine_ls_shift/su_max 0.000
_refine_ls_shift/su_mean 0.000

loop_
_atom_site_label
_atom_site_type_symbol
_atom_site_fract_x
_atom_site_fract_y
_atom_site_fract_z
_atom_site_U_iso_or_equiv
_atom_site_adp_type
```

```
_atom_site_occupancy
_atom_site_symmetry_multiplicity
_atom_site_calc_flag
_atom_site_refinement_flags
_atom_site_disorder_assembly
_atom_site_disorder_group
N1 N 0.1760(2) 0.2094(2) 0.04980(16) 0.0394(5) Uani 1 1 d . . .
O1 O 0.4471(3) 0.7160(2) -0.19828(17) 0.0658(6) Uani 1 1 d . . .
O2 O 0.4998(2) 0.5337(2) -0.30174(14) 0.0544(5) Uani 1 1 d . . .
O3 O 0.5756(2) 0.1693(2) -0.20811(14) 0.0532(5) Uani 1 1 d . . .
O4 O 0.3542(2) 0.2214(2) -0.31665(14) 0.0561(5) Uani 1 1 d . . .
O5 O -0.1610(2) 0.1854(2) 0.42751(15) 0.0576(5) Uani 1 1 d . . .
C1 C 0.5825(4) 0.6568(4) -0.3939(2) 0.0626(8) Uani 1 1 d . . .
H1A H 0.5080 0.7504 -0.4231 0.094 Uiso 1 1 calc R . .
H1B H 0.6196 0.6101 -0.4574 0.094 Uiso 1 1 calc R . .
H1C H 0.6753 0.6922 -0.3629 0.094 Uiso 1 1 calc R . .
C2 C 0.4374(3) 0.5806(3) -0.2091(2) 0.0420(6) Uani 1 1 d . . .
C3 C 0.3497(3) 0.4441(3) -0.12043(19) 0.0374(6) Uani 1 1 d . . .
C4 C 0.2700(3) 0.4830(3) -0.02405(19) 0.0384(6) Uani 1 1 d . . .
H4 H 0.2737 0.5897 -0.0157 0.046 Uiso 1 1 calc R . .
C5 C 0.1842(3) 0.3631(3) 0.06068(18) 0.0360(5) Uani 1 1 d . . .
C6 C 0.0971(3) 0.3974(3) 0.16718(19) 0.0364(5) Uani 1 1 d . . .
C7 C 0.1010(3) 0.5490(3) 0.1903(2) 0.0482(6) Uani 1 1 d . . .
H7 H 0.1599 0.6336 0.1388 0.058 Uiso 1 1 calc R . .
C8 C 0.0178(3) 0.5754(3) 0.2898(2) 0.0544(7) Uani 1 1 d . . .
H8 H 0.0206 0.6785 0.3044 0.065 Uiso 1 1 calc R . .
C9 C -0.0684(3) 0.4533(3) 0.3674(2) 0.0491(7) Uani 1 1 d . . .
H9 H -0.1241 0.4726 0.4342 0.059 Uiso 1 1 calc R . .
C10 C -0.0721(3) 0.3005(3) 0.34539(19) 0.0405(6) Uani 1 1 d . . .
C11 C 0.0095(3) 0.2725(3) 0.24544(19) 0.0382(6) Uani 1 1 d . . .
H11 H 0.0055 0.1696 0.2306 0.046 Uiso 1 1 calc R . .
C12 C 0.2528(3) 0.1704(3) -0.04313(19) 0.0412(6) Uani 1 1 d . . .
C13 C 0.3425(3) 0.2840(3) -0.13078(18) 0.0376(6) Uani 1 1 d . . .
C14 C 0.4220(3) 0.2255(3) -0.2312(2) 0.0416(6) Uani 1 1 d . . .
C15 C 0.6611(4) 0.0988(4) -0.2950(3) 0.0715(9) Uani 1 1 d . . .
H15A H 0.5934 0.0202 -0.3126 0.107 Uiso 1 1 calc R . .
H15B H 0.7621 0.0437 -0.2644 0.107 Uiso 1 1 calc R . .
H15C H 0.6848 0.1857 -0.3660 0.107 Uiso 1 1 calc R . .
C16 C 0.2355(4) -0.0044(3) -0.0489(2) 0.0579(7) Uani 1 1 d . . .
H16A H 0.2137 -0.0753 0.0296 0.087 Uiso 1 1 calc R . .
H16B H 0.3355 -0.0428 -0.0825 0.087 Uiso 1 1 calc R . .
H16C H 0.1462 -0.0066 -0.0973 0.087 Uiso 1 1 calc R . .
C17 C -0.1803(4) 0.0312(4) 0.4050(3) 0.0674(9) Uani 1 1 d . . .
H17A H -0.2311 0.0494 0.3310 0.101 Uiso 1 1 calc R . .
```

H17B H -0.2483 -0.0362 0.4677 0.101 Uiso 1 1 calc R . .  
H17C H -0.0744 -0.0246 0.4012 0.101 Uiso 1 1 calc R . .

loop\_

\_atom\_site\_aniso\_label

\_atom\_site\_aniso\_U\_11

\_atom\_site\_aniso\_U\_22

\_atom\_site\_aniso\_U\_33

\_atom\_site\_aniso\_U\_23

\_atom\_site\_aniso\_U\_13

\_atom\_site\_aniso\_U\_12

N1 0.0494(12) 0.0364(11) 0.0324(10) -0.0103(8) 0.0055(8) -0.0059(8)  
O1 0.0883(15) 0.0485(12) 0.0591(12) -0.0138(9) 0.0182(10) -0.0207(10)  
O2 0.0674(12) 0.0508(11) 0.0407(10) -0.0082(8) 0.0191(8) -0.0141(9)  
O3 0.0527(12) 0.0600(12) 0.0455(10) -0.0166(8) 0.0072(8) 0.0051(9)  
O4 0.0652(12) 0.0709(13) 0.0370(10) -0.0225(9) 0.0003(8) -0.0080(9)  
O5 0.0678(13) 0.0631(12) 0.0428(10) -0.0181(8) 0.0218(9) -0.0203(9)  
C1 0.0672(19) 0.0663(18) 0.0430(15) 0.0011(13) 0.0184(13) -0.0164(14)  
C2 0.0434(14) 0.0426(15) 0.0368(13) -0.0059(11) 0.0003(10) -0.0039(11)  
C3 0.0387(13) 0.0410(13) 0.0303(11) -0.0055(10) -0.0028(9) -0.0037(10)  
C4 0.0438(14) 0.0364(12) 0.0347(12) -0.0095(10) 0.0005(10) -0.0038(10)  
C5 0.0387(13) 0.0380(13) 0.0302(11) -0.0078(9) -0.0011(9) -0.0032(10)  
C6 0.0370(12) 0.0417(13) 0.0307(11) -0.0105(10) -0.0015(9) -0.0018(10)  
C7 0.0589(16) 0.0405(14) 0.0460(14) -0.0139(11) 0.0068(12) -0.0101(12)  
C8 0.0665(18) 0.0453(15) 0.0576(16) -0.0257(13) 0.0082(13) -0.0085(13)  
C9 0.0518(16) 0.0600(17) 0.0420(14) -0.0268(12) 0.0068(11) -0.0040(12)  
C10 0.0409(13) 0.0469(14) 0.0334(12) -0.0115(10) 0.0032(10) -0.0045(10)  
C11 0.0431(14) 0.0361(12) 0.0357(12) -0.0105(10) 0.0002(10) -0.0033(10)  
C12 0.0494(14) 0.0415(13) 0.0318(12) -0.0094(10) 0.0032(10) -0.0049(11)  
C13 0.0403(13) 0.0430(13) 0.0290(11) -0.0096(10) 0.0005(9) -0.0019(10)  
C14 0.0492(15) 0.0385(13) 0.0337(12) -0.0054(10) 0.0066(11) -0.0068(10)  
C15 0.068(2) 0.078(2) 0.0689(19) -0.0301(16) 0.0190(15) 0.0125(16)  
C16 0.081(2) 0.0476(15) 0.0472(15) -0.0184(12) 0.0165(13) -0.0163(13)  
C17 0.086(2) 0.0585(18) 0.0569(17) -0.0159(14) 0.0232(15) -0.0288(16)

\_geom\_special\_details

;

All esds (except the esd in the dihedral angle between two l.s. planes) are estimated using the full covariance matrix. The cell esds are taken into account individually in the estimation of esds in distances, angles and torsion angles; correlations between esds in cell parameters are only used when they are defined by crystal symmetry. An approximate (isotropic) treatment of cell esds is used for estimating esds involving l.s. planes.

;

loop\_  
\_geom\_bond\_atom\_site\_label\_1  
\_geom\_bond\_atom\_site\_label\_2  
\_geom\_bond\_distance  
\_geom\_bond\_site\_symmetry\_2  
\_geom\_bond\_publ\_flag  
N1 C12 1.333(3) . ?  
N1 C5 1.337(3) . ?  
O1 C2 1.186(3) . ?  
O2 C2 1.321(3) . ?  
O2 C1 1.435(3) . ?  
O3 C14 1.329(3) . ?  
O3 C15 1.439(3) . ?  
O4 C14 1.191(3) . ?  
O5 C10 1.365(3) . ?  
O5 C17 1.412(3) . ?  
C1 H1A 0.9600 . ?  
C1 H1B 0.9600 . ?  
C1 H1C 0.9600 . ?  
C2 C3 1.498(3) . ?  
C3 C4 1.378(3) . ?  
C3 C13 1.388(3) . ?  
C4 C5 1.389(3) . ?  
C4 H4 0.9300 . ?  
C5 C6 1.488(3) . ?  
C6 C7 1.376(3) . ?  
C6 C11 1.386(3) . ?  
C7 C8 1.379(3) . ?  
C7 H7 0.9300 . ?  
C8 C9 1.363(4) . ?  
C8 H8 0.9300 . ?  
C9 C10 1.380(3) . ?  
C9 H9 0.9300 . ?  
C10 C11 1.382(3) . ?  
C11 H11 0.9300 . ?  
C12 C13 1.394(3) . ?  
C12 C16 1.503(3) . ?  
C13 C14 1.497(3) . ?  
C15 H15A 0.9600 . ?  
C15 H15B 0.9600 . ?  
C15 H15C 0.9600 . ?  
C16 H16A 0.9600 . ?  
C16 H16B 0.9600 . ?



C16 H16C 0.9600 . ?  
C17 H17A 0.9600 . ?  
C17 H17B 0.9600 . ?  
C17 H17C 0.9600 . ?

loop\_

\_geom\_angle\_atom\_site\_label\_1  
\_geom\_angle\_atom\_site\_label\_2  
\_geom\_angle\_atom\_site\_label\_3  
\_geom\_angle  
\_geom\_angle\_site\_symmetry\_1  
\_geom\_angle\_site\_symmetry\_3  
\_geom\_angle\_publ\_flag  
C12 N1 C5 119.50(19) . . ?  
C2 O2 C1 116.8(2) . . ?  
C14 O3 C15 115.5(2) . . ?  
C10 O5 C17 117.87(18) . . ?  
O2 C1 H1A 109.5 . . ?  
O2 C1 H1B 109.5 . . ?  
H1A C1 H1B 109.5 . . ?  
O2 C1 H1C 109.5 . . ?  
H1A C1 H1C 109.5 . . ?  
H1B C1 H1C 109.5 . . ?  
O1 C2 O2 123.9(2) . . ?  
O1 C2 C3 123.9(2) . . ?  
O2 C2 C3 112.2(2) . . ?  
C4 C3 C13 118.9(2) . . ?  
C4 C3 C2 117.0(2) . . ?  
C13 C3 C2 124.1(2) . . ?  
C3 C4 C5 120.0(2) . . ?  
C3 C4 H4 120.0 . . ?  
C5 C4 H4 120.0 . . ?  
N1 C5 C4 121.0(2) . . ?  
N1 C5 C6 116.61(19) . . ?  
C4 C5 C6 122.4(2) . . ?  
C7 C6 C11 119.1(2) . . ?  
C7 C6 C5 122.1(2) . . ?  
C11 C6 C5 118.8(2) . . ?  
C6 C7 C8 120.1(2) . . ?  
C6 C7 H7 120.0 . . ?  
C8 C7 H7 120.0 . . ?  
C9 C8 C7 121.3(2) . . ?  
C9 C8 H8 119.4 . . ?  
C7 C8 H8 119.4 . . ?

C8 C9 C10 119.1(2) . . ?  
C8 C9 H9 120.5 . . ?  
C10 C9 H9 120.5 . . ?  
O5 C10 C9 115.3(2) . . ?  
O5 C10 C11 124.4(2) . . ?  
C9 C10 C11 120.3(2) . . ?  
C10 C11 C6 120.1(2) . . ?  
C10 C11 H11 119.9 . . ?  
C6 C11 H11 119.9 . . ?  
N1 C12 C13 122.6(2) . . ?  
N1 C12 C16 115.9(2) . . ?  
C13 C12 C16 121.5(2) . . ?  
C3 C13 C12 118.0(2) . . ?  
C3 C13 C14 124.4(2) . . ?  
C12 C13 C14 117.5(2) . . ?  
O4 C14 O3 124.8(2) . . ?  
O4 C14 C13 124.7(2) . . ?  
O3 C14 C13 110.42(19) . . ?  
O3 C15 H15A 109.5 . . ?  
O3 C15 H15B 109.5 . . ?  
H15A C15 H15B 109.5 . . ?  
O3 C15 H15C 109.5 . . ?  
H15A C15 H15C 109.5 . . ?  
H15B C15 H15C 109.5 . . ?  
C12 C16 H16A 109.5 . . ?  
C12 C16 H16B 109.5 . . ?  
H16A C16 H16B 109.5 . . ?  
C12 C16 H16C 109.5 . . ?  
H16A C16 H16C 109.5 . . ?  
H16B C16 H16C 109.5 . . ?  
O5 C17 H17A 109.5 . . ?  
O5 C17 H17B 109.5 . . ?  
H17A C17 H17B 109.5 . . ?  
O5 C17 H17C 109.5 . . ?  
H17A C17 H17C 109.5 . . ?  
H17B C17 H17C 109.5 . . ?

loop\_  
\_geom\_torsion\_atom\_site\_label\_1  
\_geom\_torsion\_atom\_site\_label\_2  
\_geom\_torsion\_atom\_site\_label\_3  
\_geom\_torsion\_atom\_site\_label\_4  
\_geom\_torsion  
\_geom\_torsion\_site\_symmetry\_1

\_geom\_torsion\_site\_symmetry\_2  
\_geom\_torsion\_site\_symmetry\_3  
\_geom\_torsion\_site\_symmetry\_4  
\_geom\_torsion\_publ\_flag  
C1 O2 C2 O1 -0.5(4) . . . . ?  
C1 O2 C2 C3 178.22(19) . . . . ?  
O1 C2 C3 C4 3.1(4) . . . . ?  
O2 C2 C3 C4 -175.6(2) . . . . ?  
O1 C2 C3 C13 -177.8(2) . . . . ?  
O2 C2 C3 C13 3.5(3) . . . . ?  
C13 C3 C4 C5 -0.1(3) . . . . ?  
C2 C3 C4 C5 179.05(19) . . . . ?  
C12 N1 C5 C4 0.6(3) . . . . ?  
C12 N1 C5 C6 -179.39(19) . . . . ?  
C3 C4 C5 N1 -0.6(3) . . . . ?  
C3 C4 C5 C6 179.40(19) . . . . ?  
N1 C5 C6 C7 177.8(2) . . . . ?  
C4 C5 C6 C7 -2.3(4) . . . . ?  
N1 C5 C6 C11 -2.2(3) . . . . ?  
C4 C5 C6 C11 177.8(2) . . . . ?  
C11 C6 C7 C8 -0.3(4) . . . . ?  
C5 C6 C7 C8 179.7(2) . . . . ?  
C6 C7 C8 C9 0.5(4) . . . . ?  
C7 C8 C9 C10 0.0(4) . . . . ?  
C17 O5 C10 C9 175.0(2) . . . . ?  
C17 O5 C10 C11 -4.4(4) . . . . ?  
C8 C9 C10 O5 179.9(2) . . . . ?  
C8 C9 C10 C11 -0.6(4) . . . . ?  
O5 C10 C11 C6 -179.8(2) . . . . ?  
C9 C10 C11 C6 0.7(3) . . . . ?  
C7 C6 C11 C10 -0.2(3) . . . . ?  
C5 C6 C11 C10 179.7(2) . . . . ?  
C5 N1 C12 C13 0.0(3) . . . . ?  
C5 N1 C12 C16 -179.3(2) . . . . ?  
C4 C3 C13 C12 0.7(3) . . . . ?  
C2 C3 C13 C12 -178.3(2) . . . . ?  
C4 C3 C13 C14 179.4(2) . . . . ?  
C2 C3 C13 C14 0.4(4) . . . . ?  
N1 C12 C13 C3 -0.7(3) . . . . ?  
C16 C12 C13 C3 178.6(2) . . . . ?  
N1 C12 C13 C14 -179.6(2) . . . . ?  
C16 C12 C13 C14 -0.2(3) . . . . ?  
C15 O3 C14 O4 -0.2(3) . . . . ?  
C15 O3 C14 C13 175.9(2) . . . . ?

C3 C13 C14 04 -95.4(3) . . . . ?  
C12 C13 C14 04 83.3(3) . . . . ?  
C3 C13 C14 03 88.4(3) . . . . ?  
C12 C13 C14 03 -92.8(2) . . . . ?

\_diffrn\_measured\_fraction\_theta\_max 0.991  
\_diffrn\_reflns\_theta\_full 25.09  
\_diffrn\_measured\_fraction\_theta\_full 0.991  
\_refine\_diff\_density\_max 0.222  
\_refine\_diff\_density\_min -0.270  
\_refine\_diff\_density\_rms 0.070

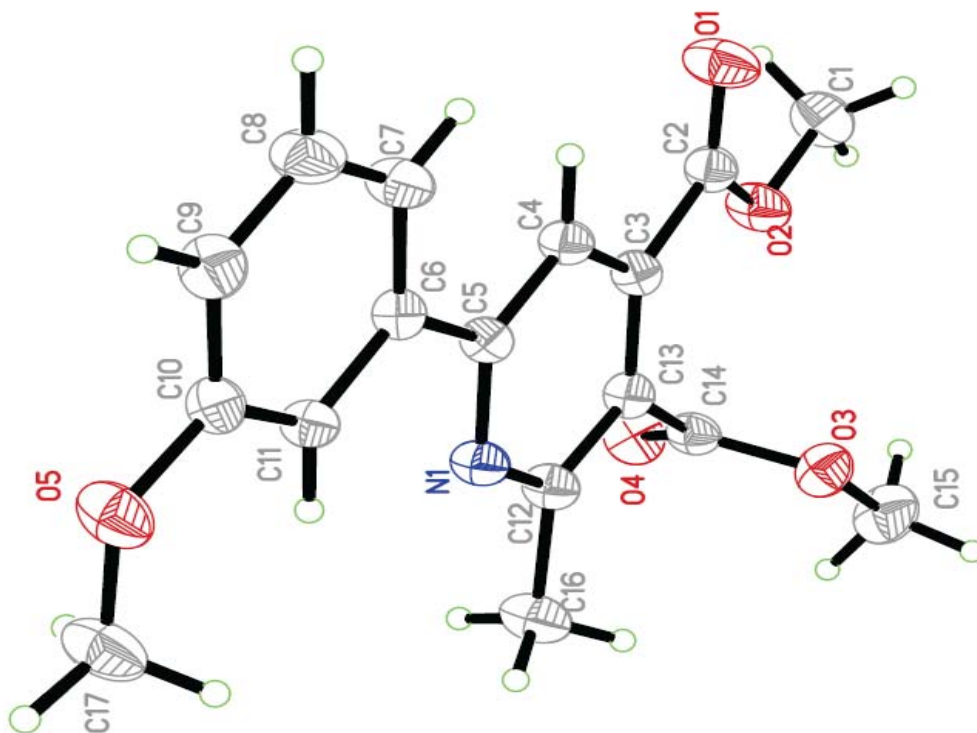

## 8. Appendix (copies of $^1\text{H}$ and $^{13}\text{C}$ NMR spectra)

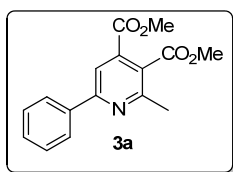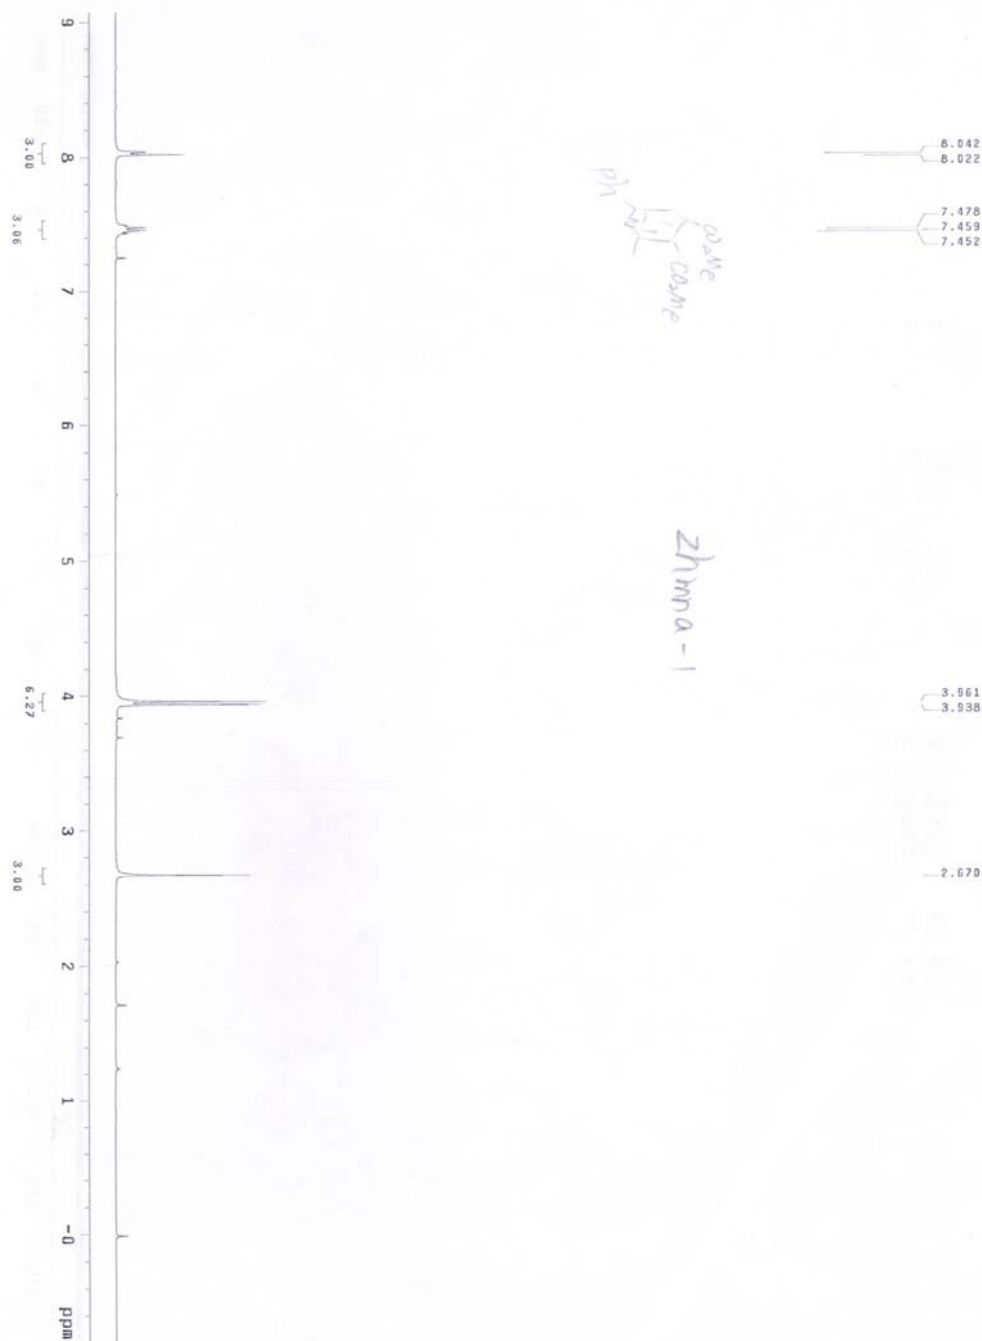

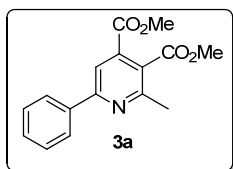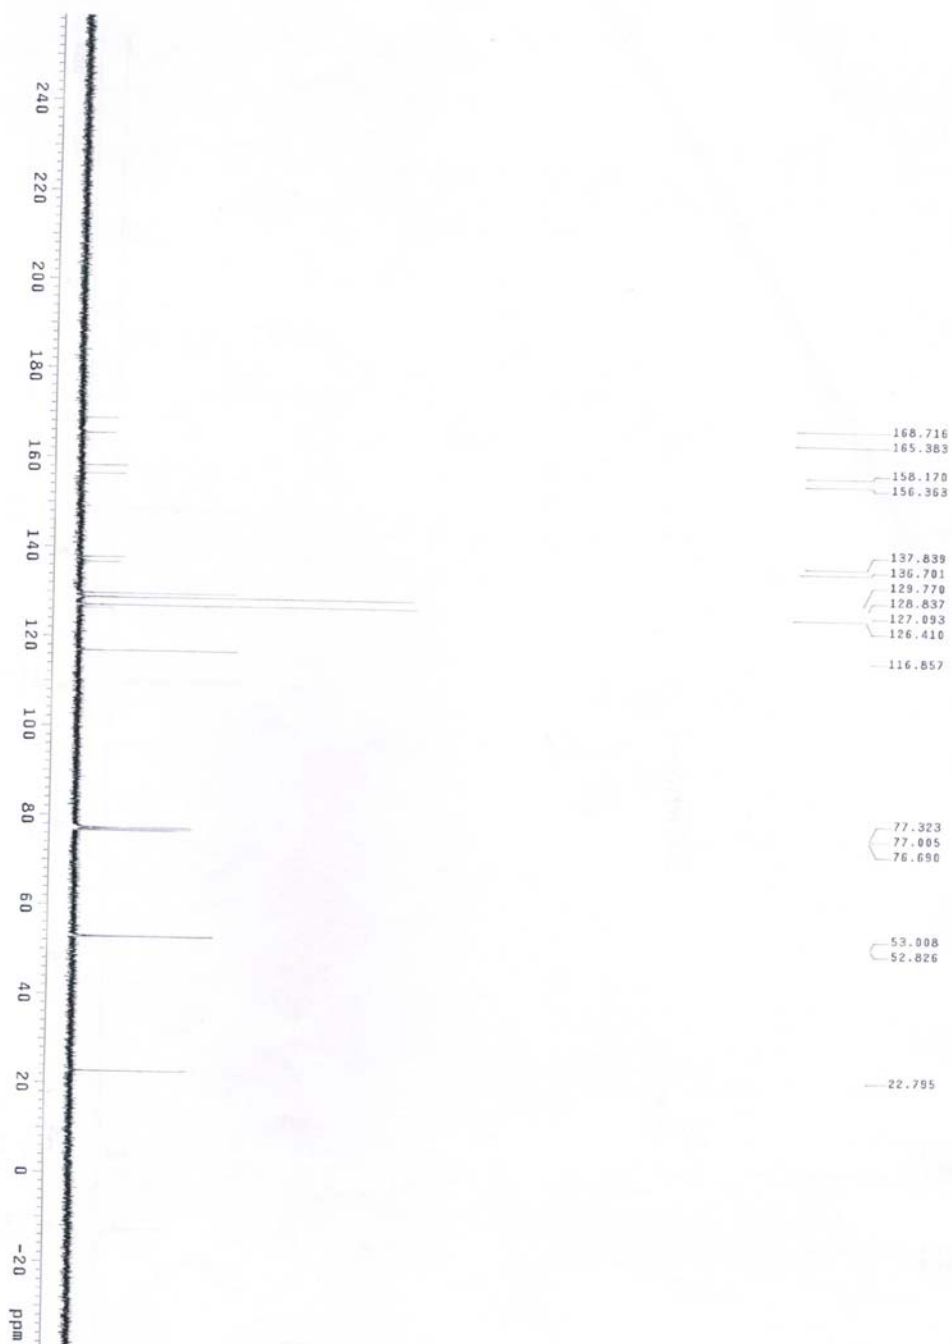

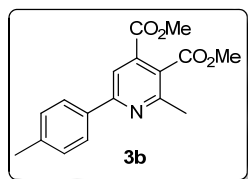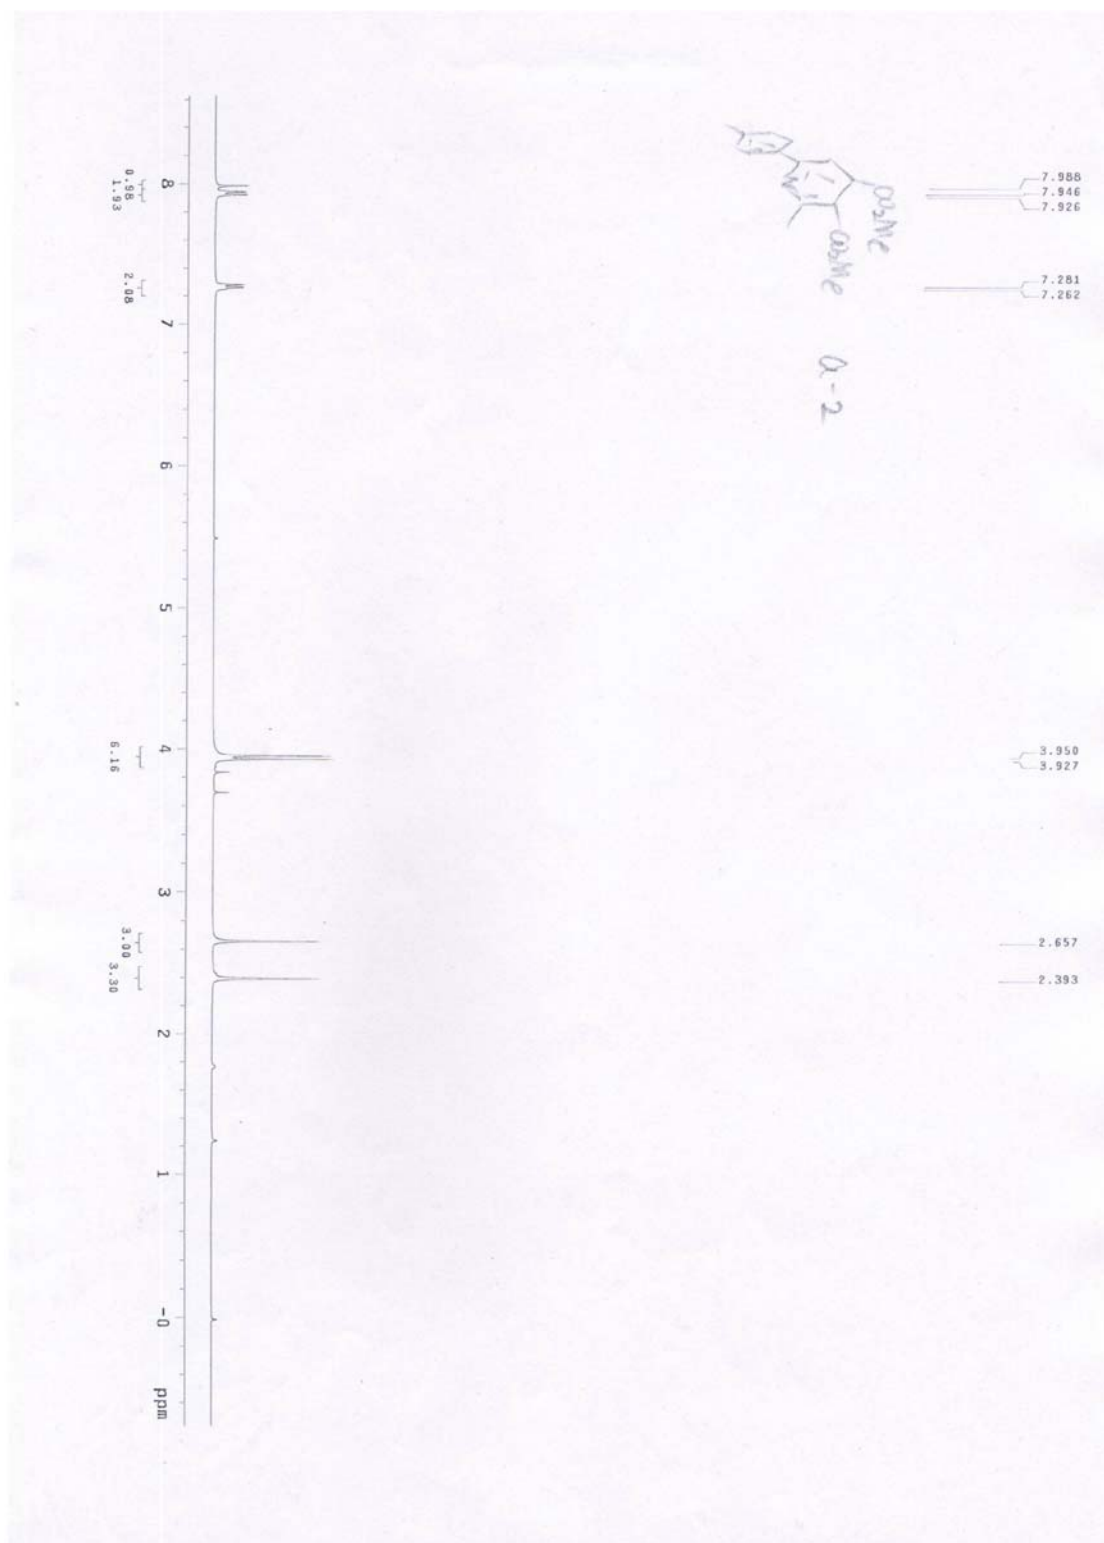

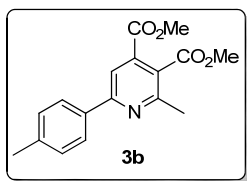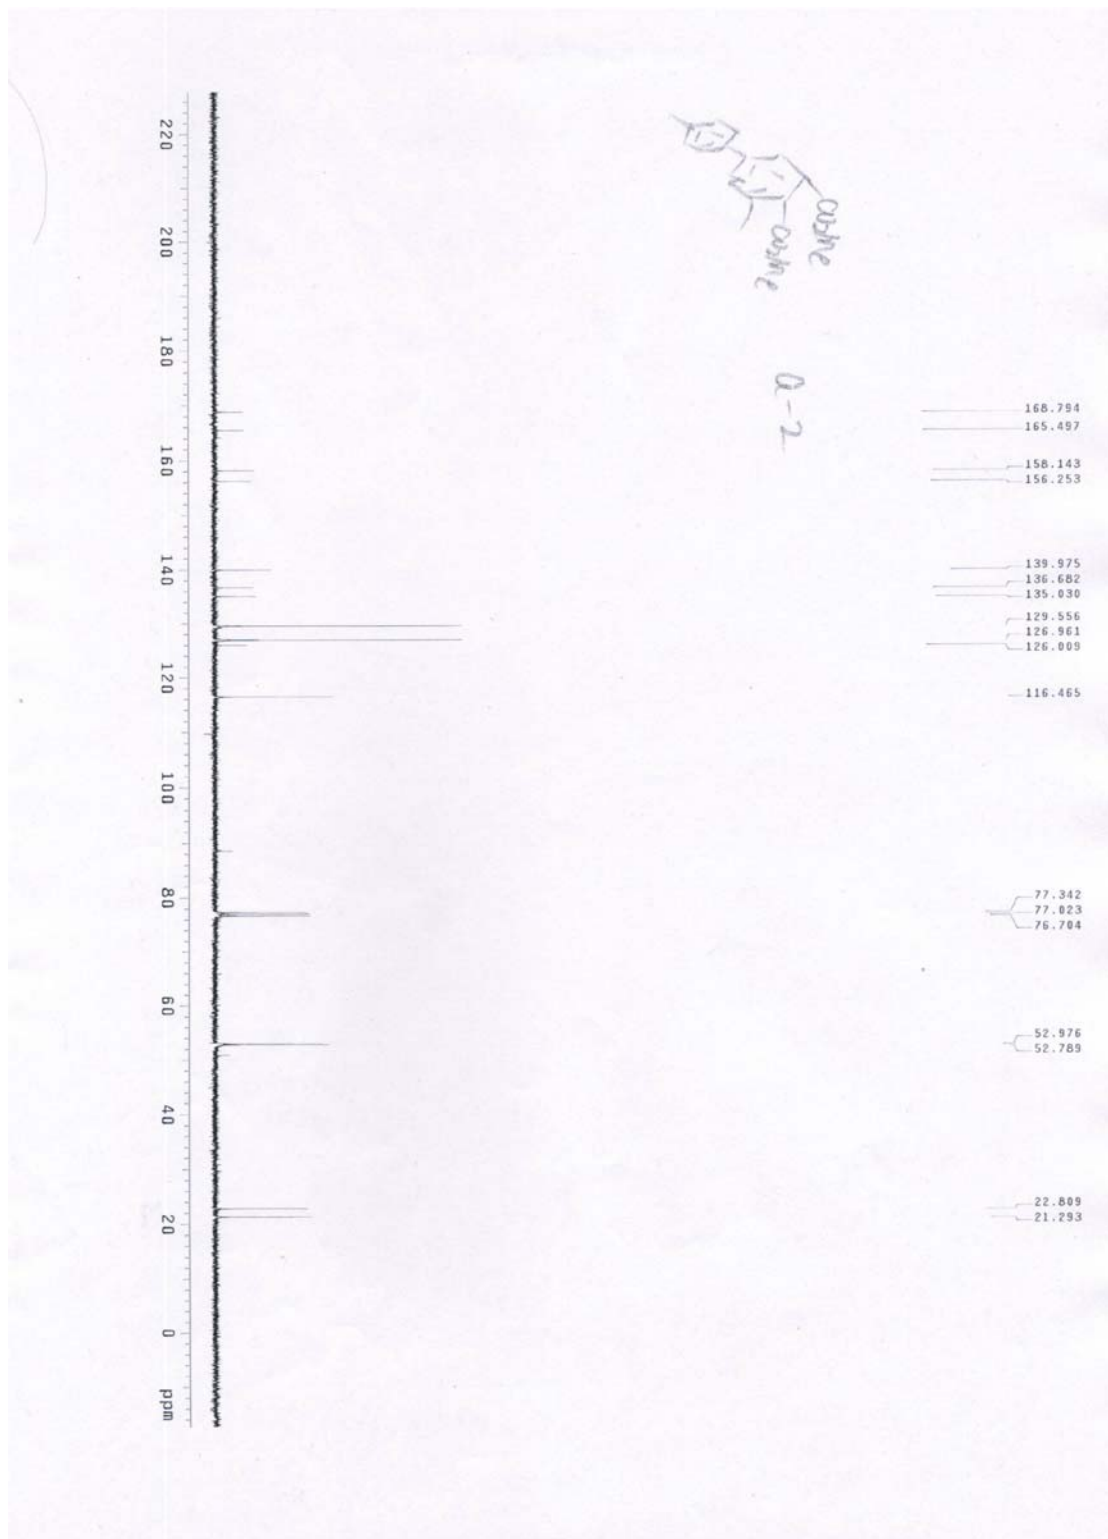



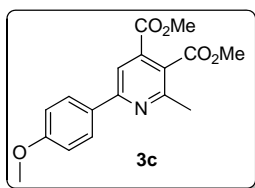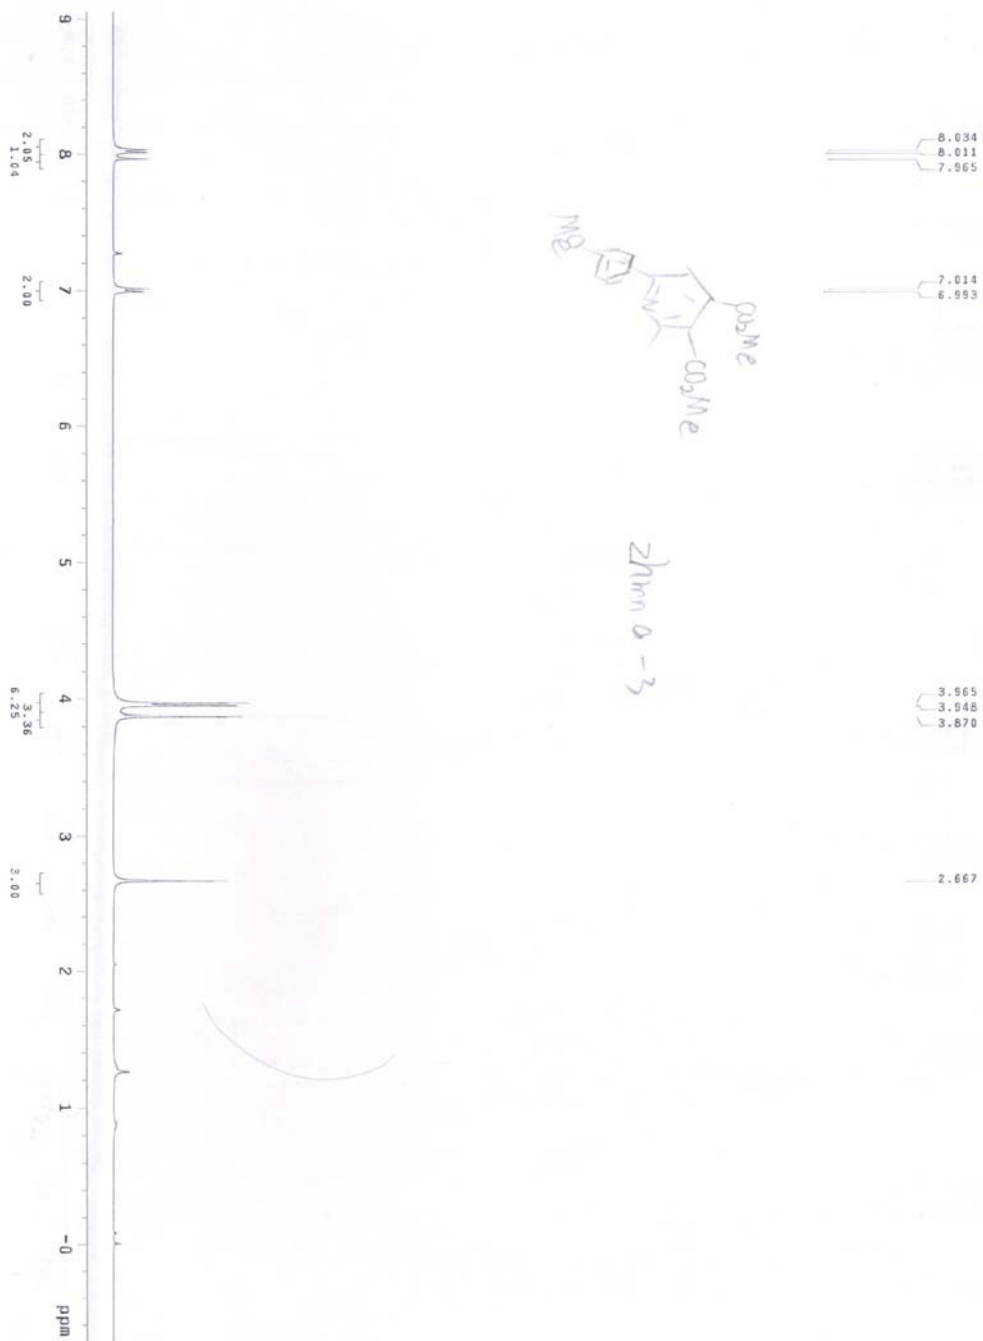

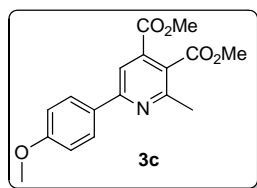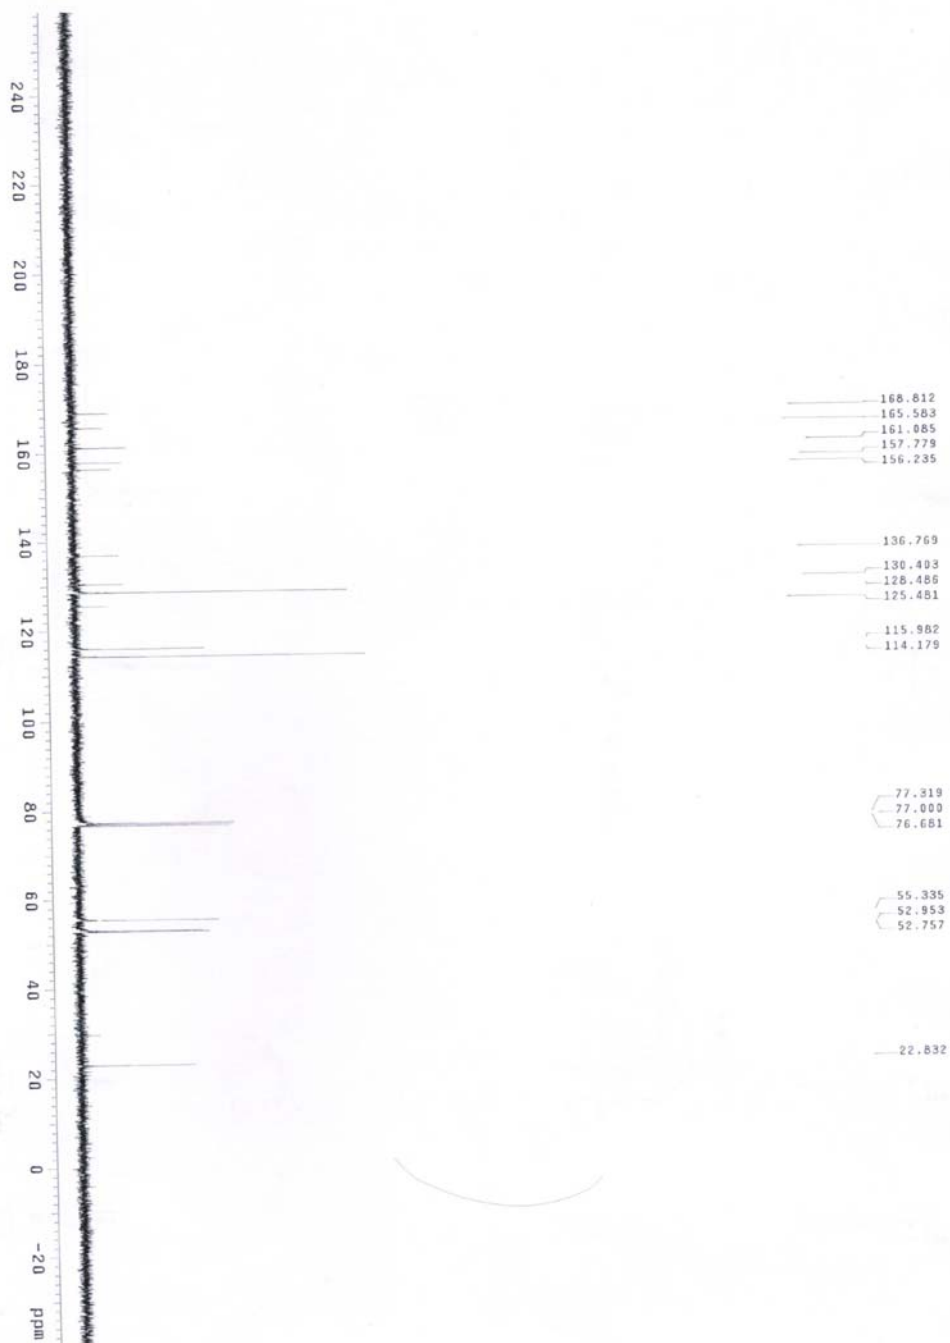

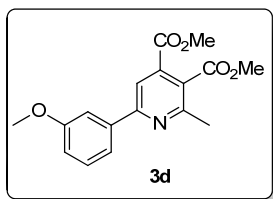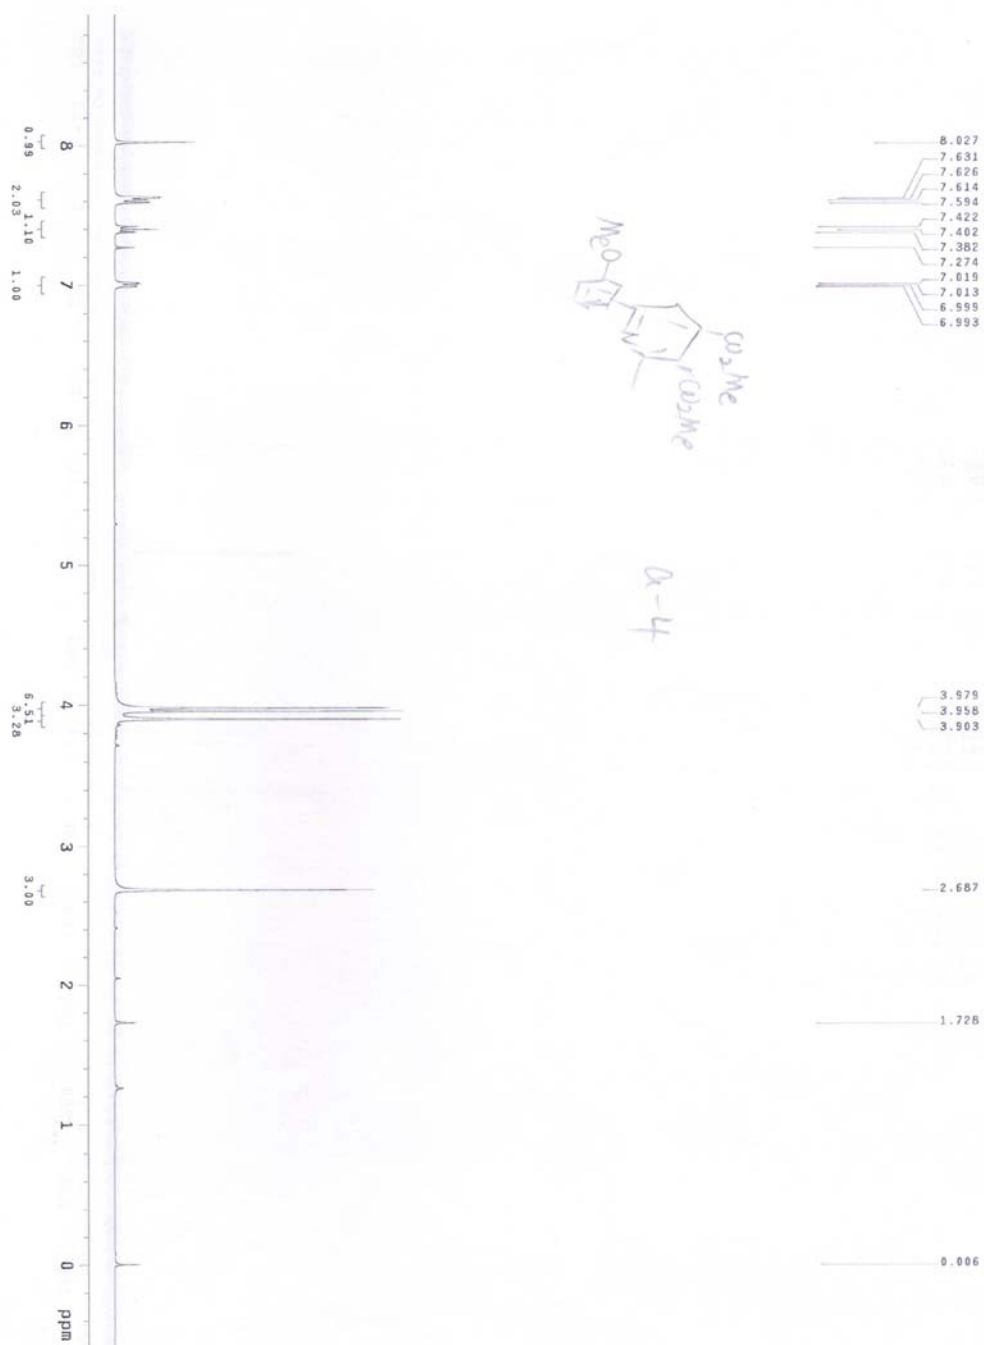

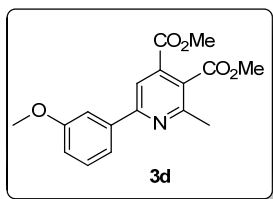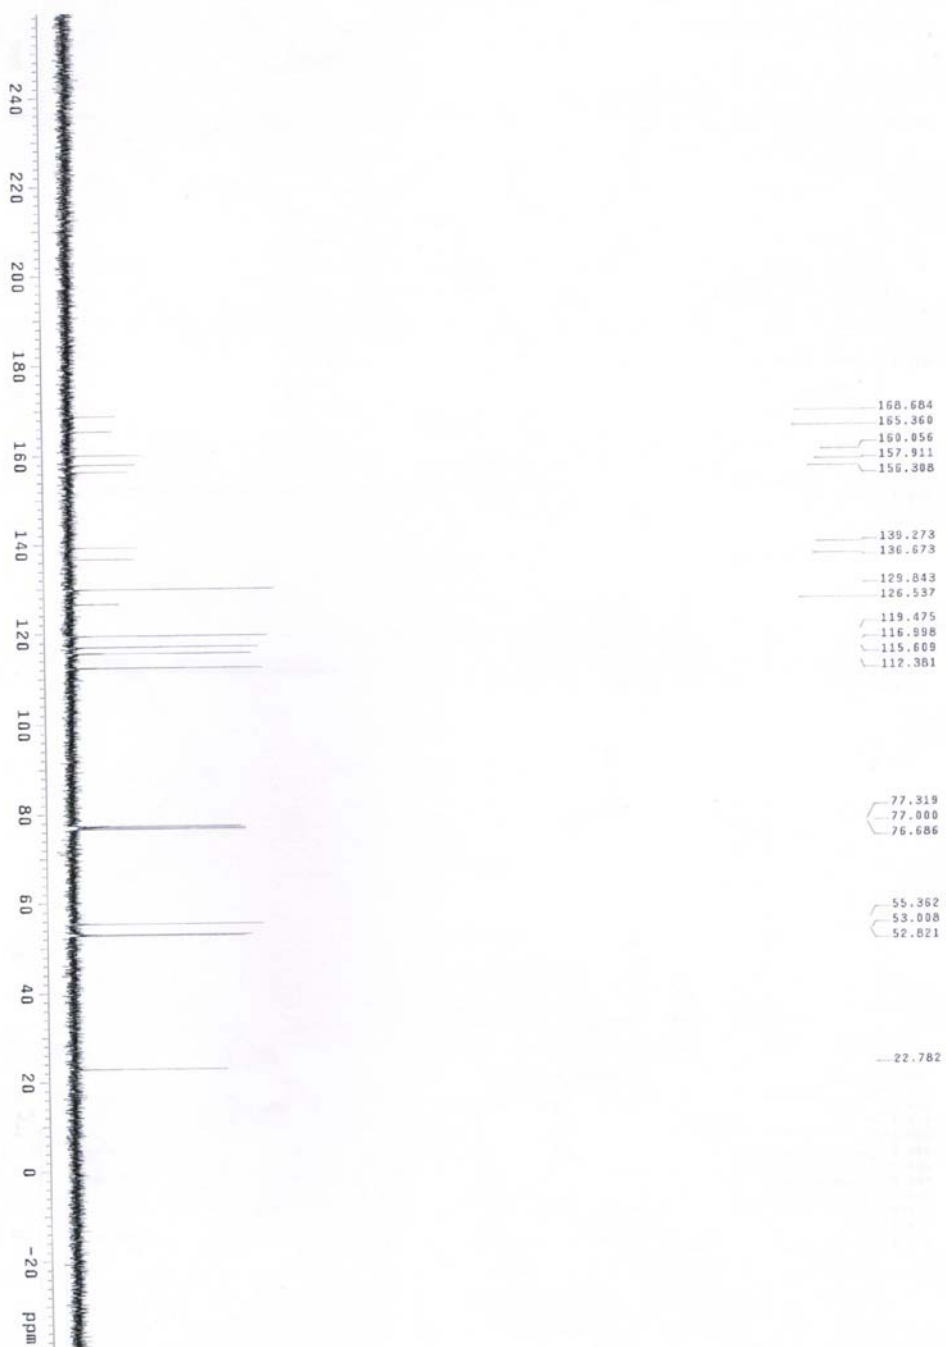

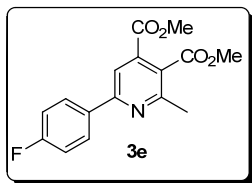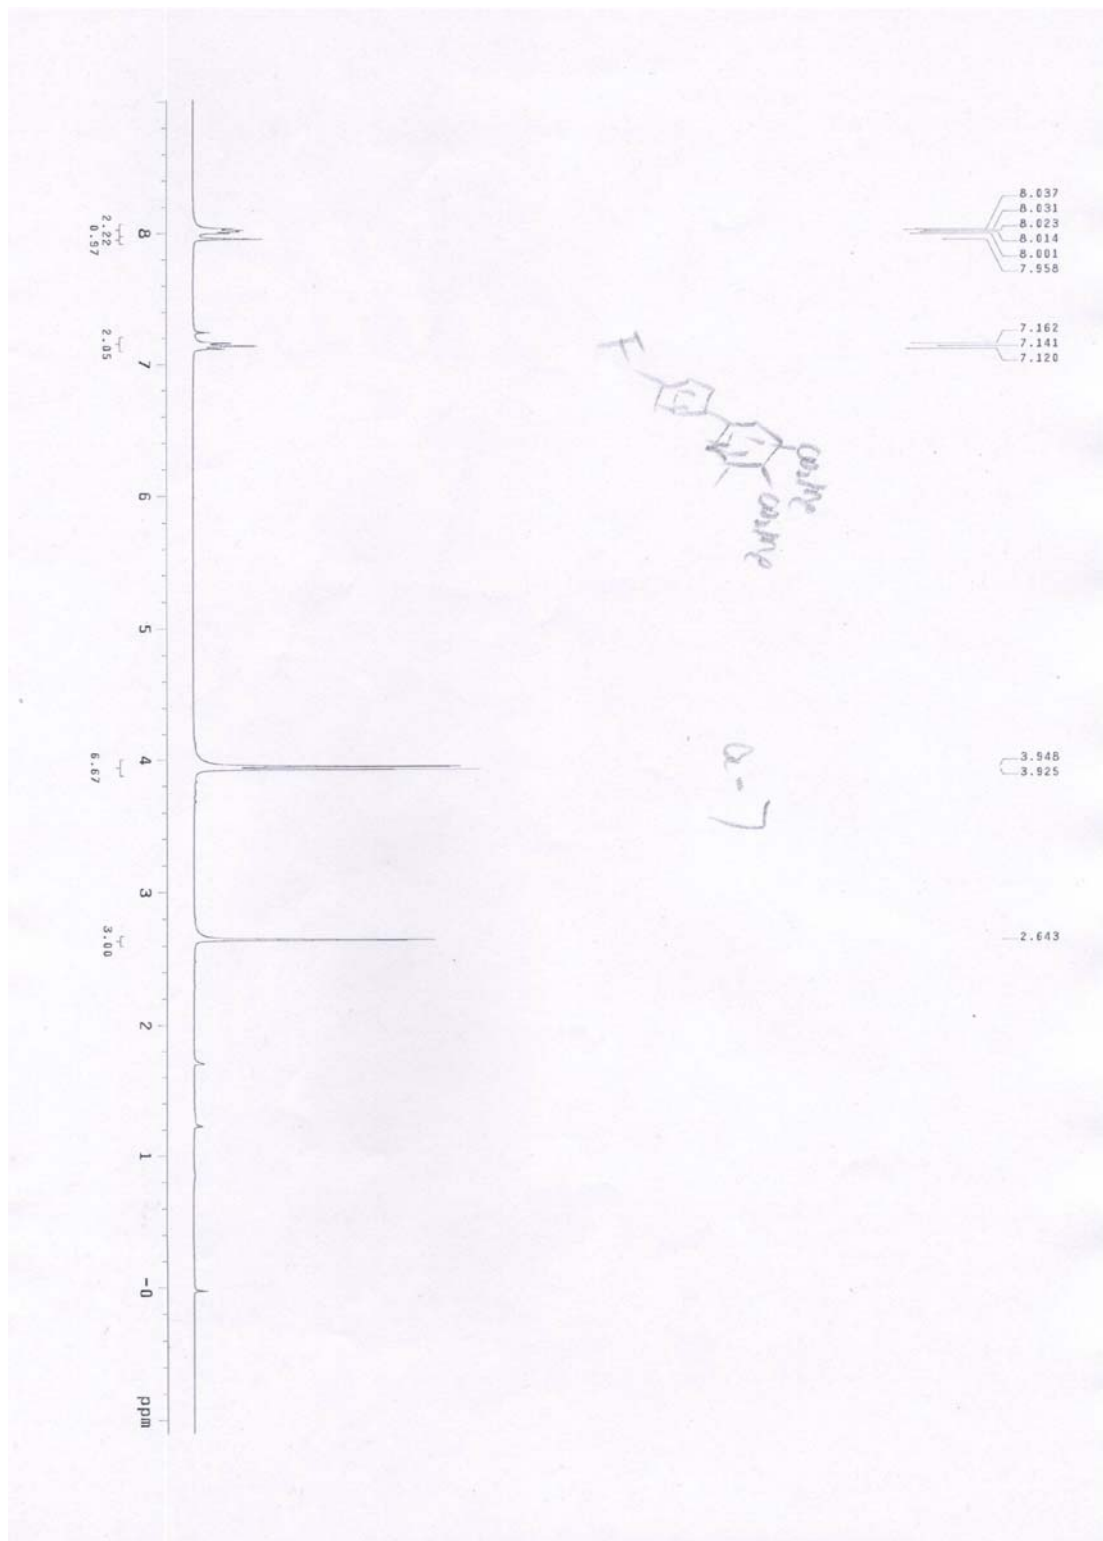

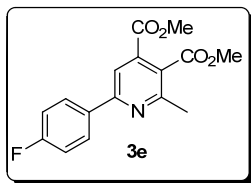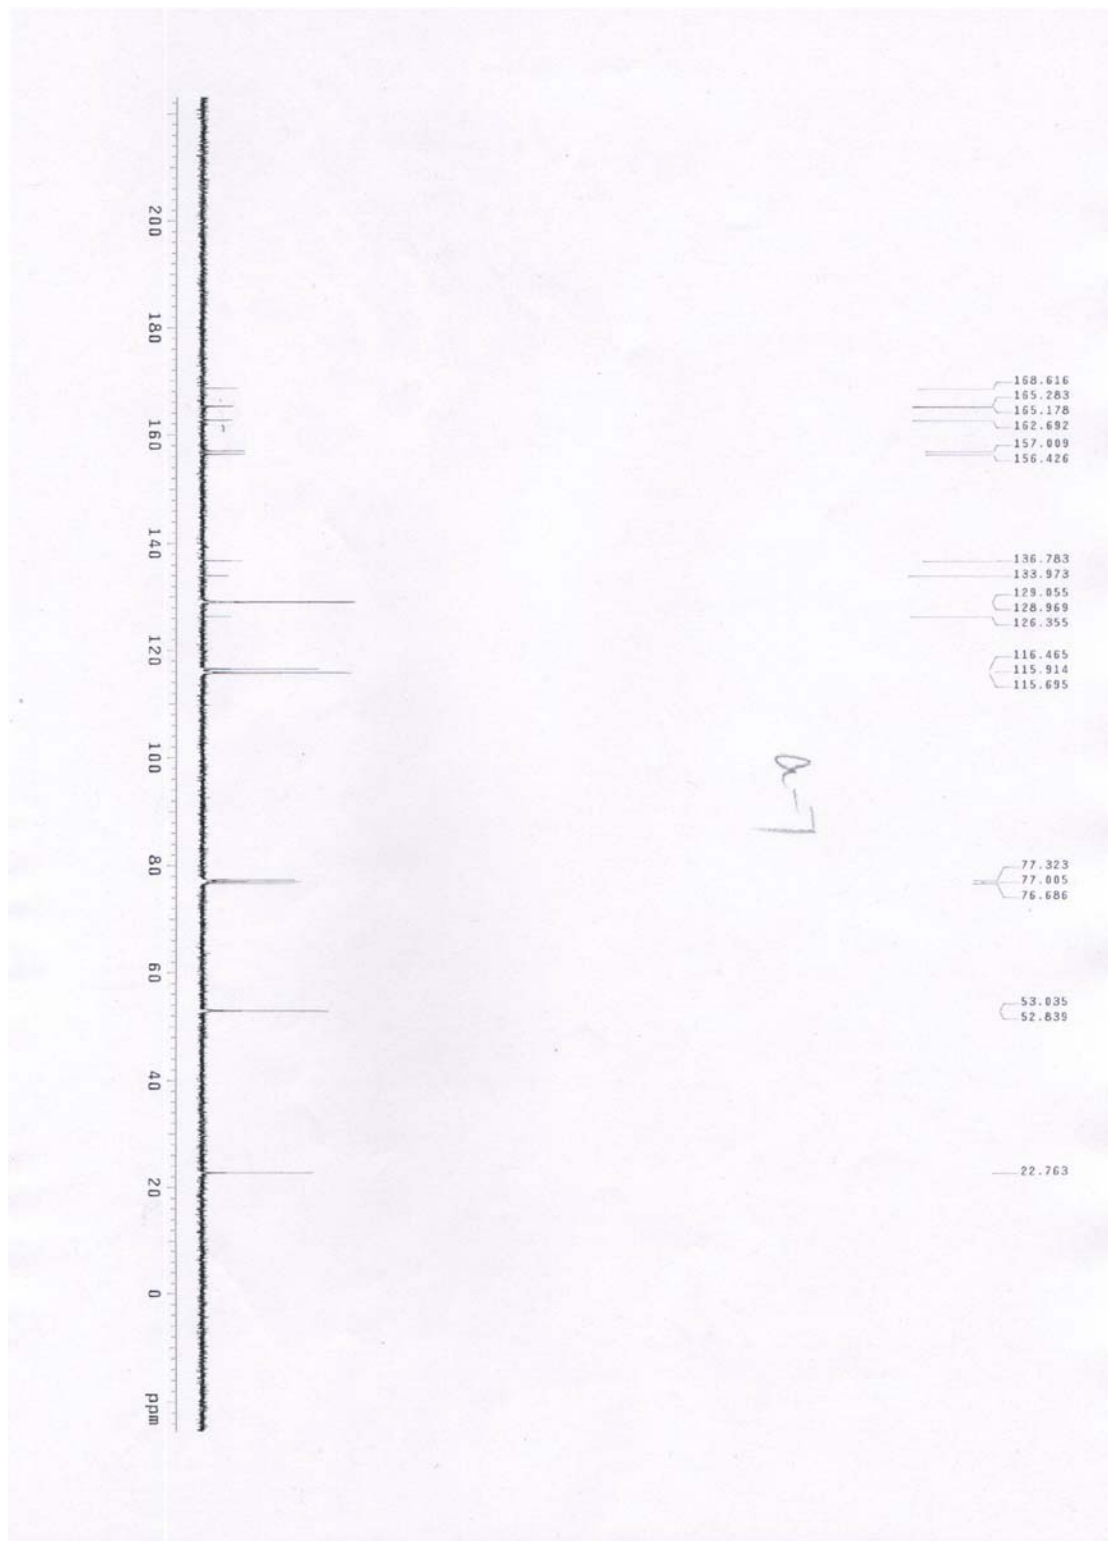

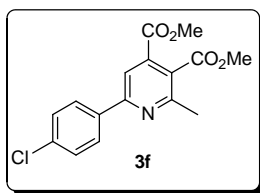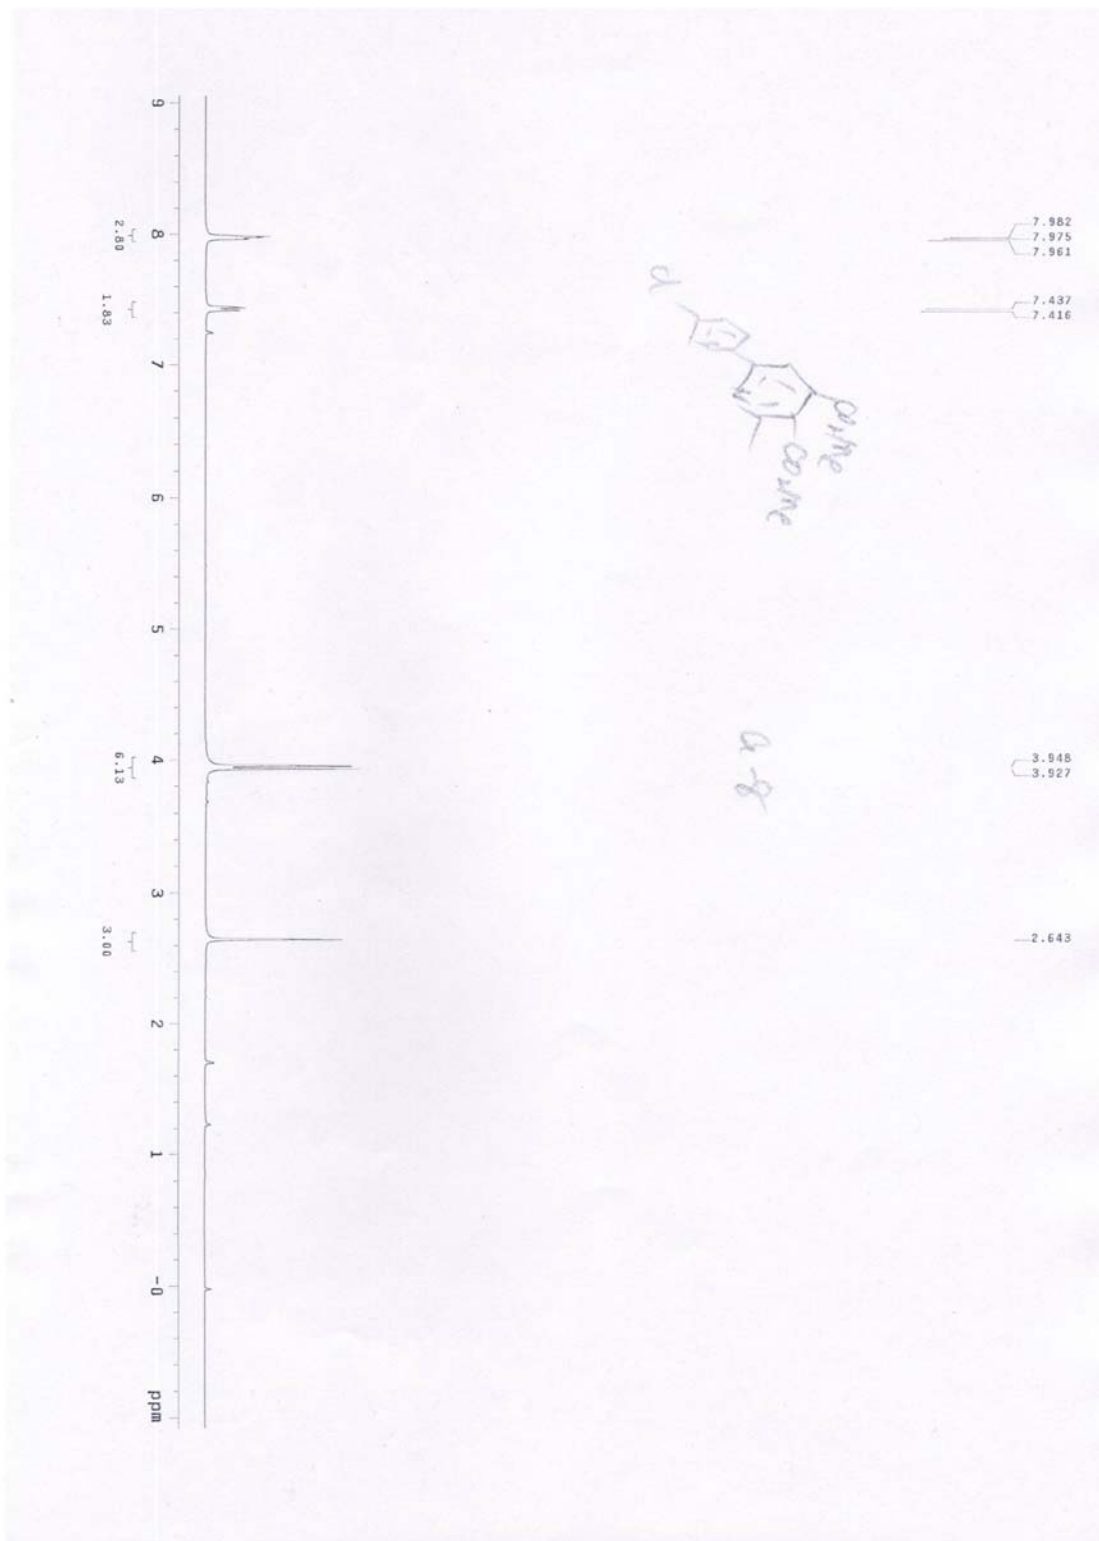

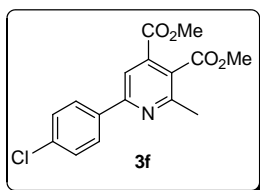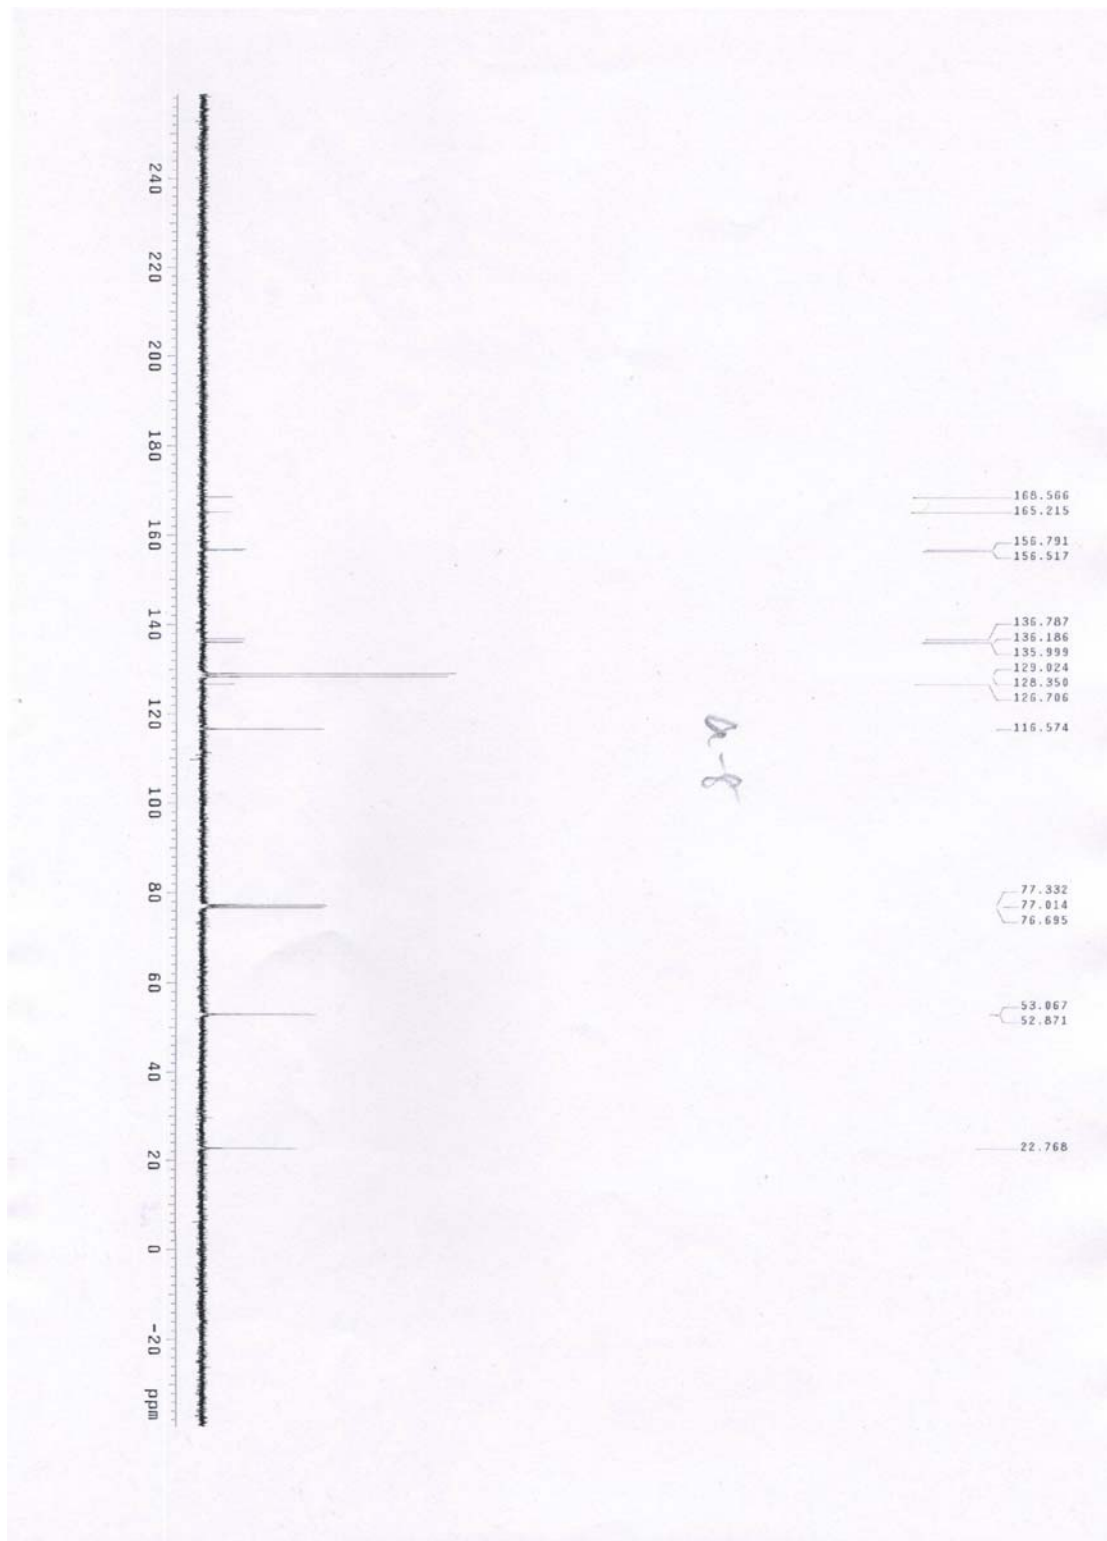



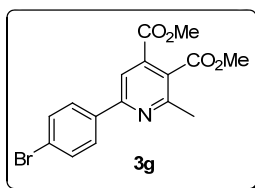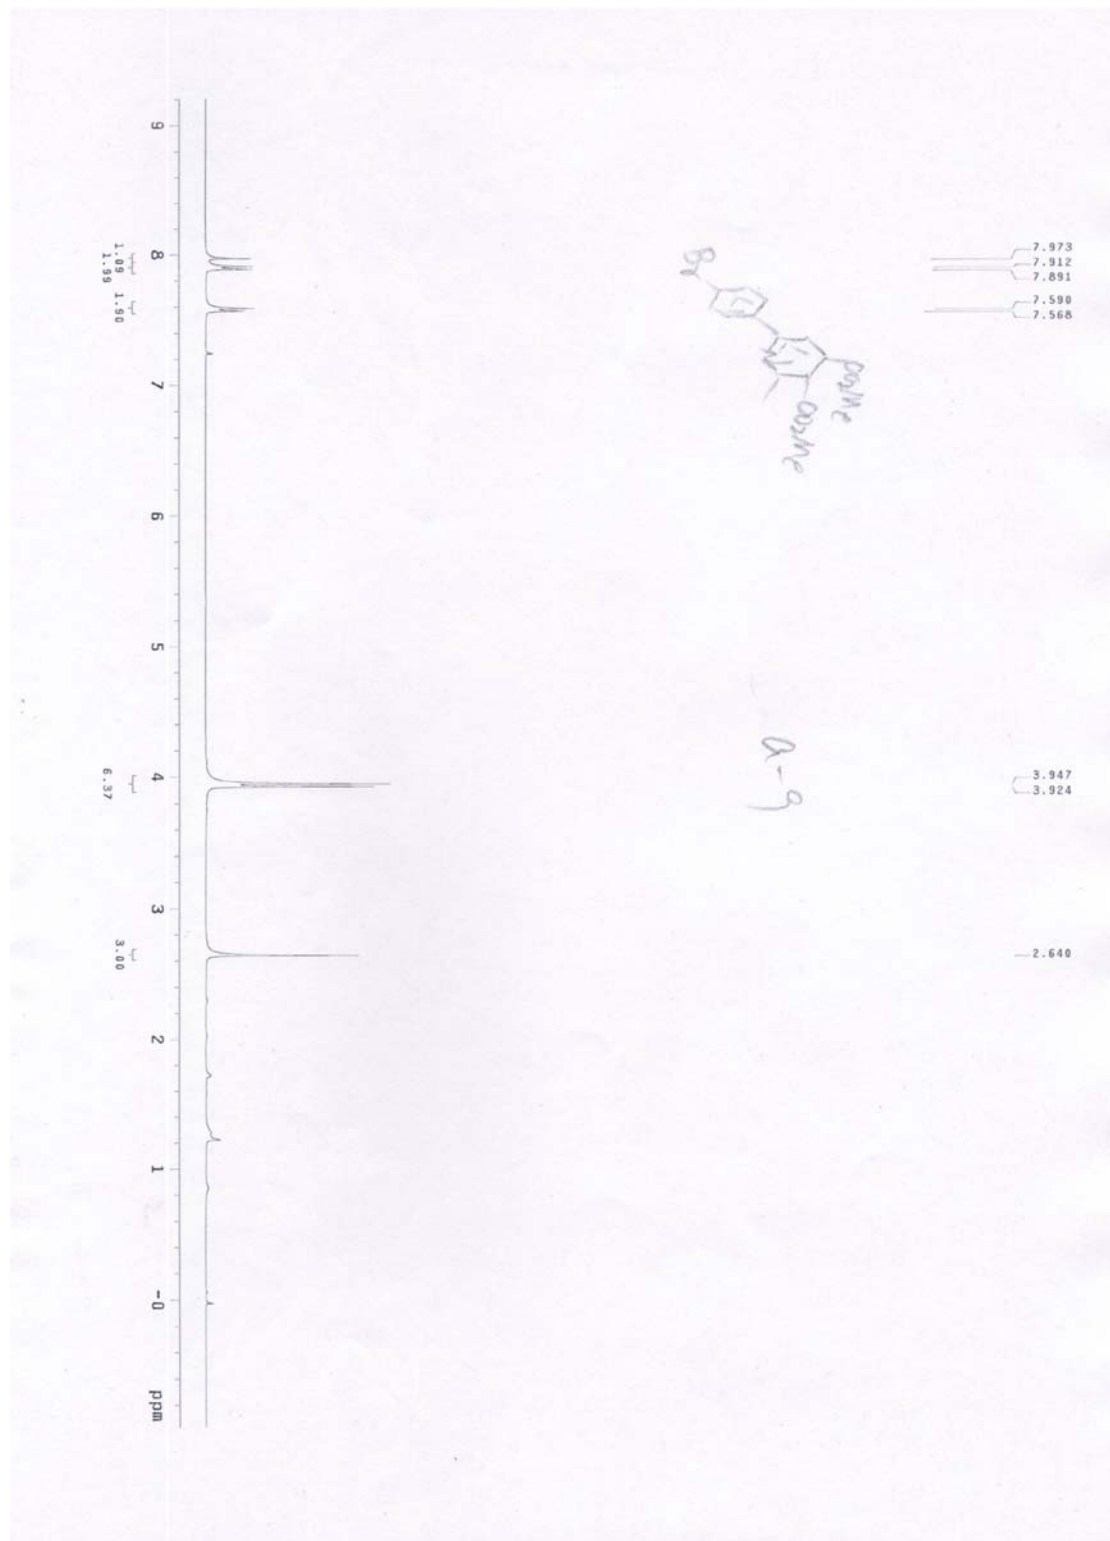

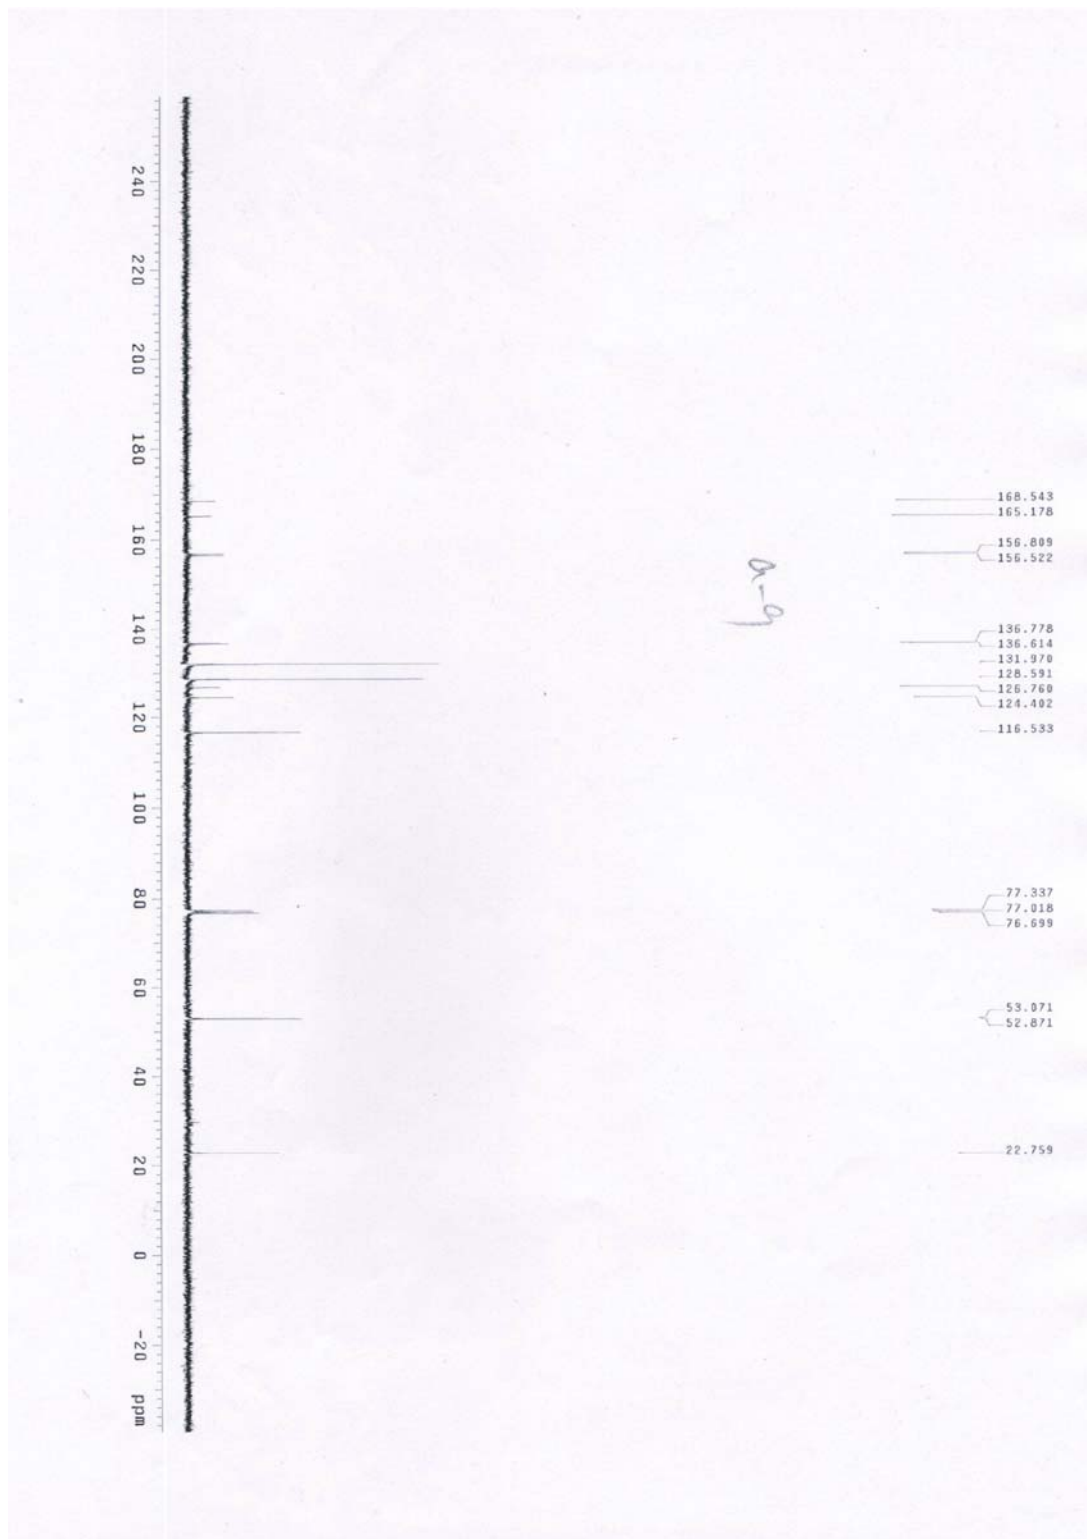

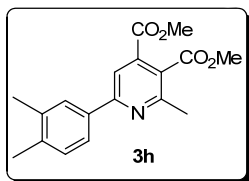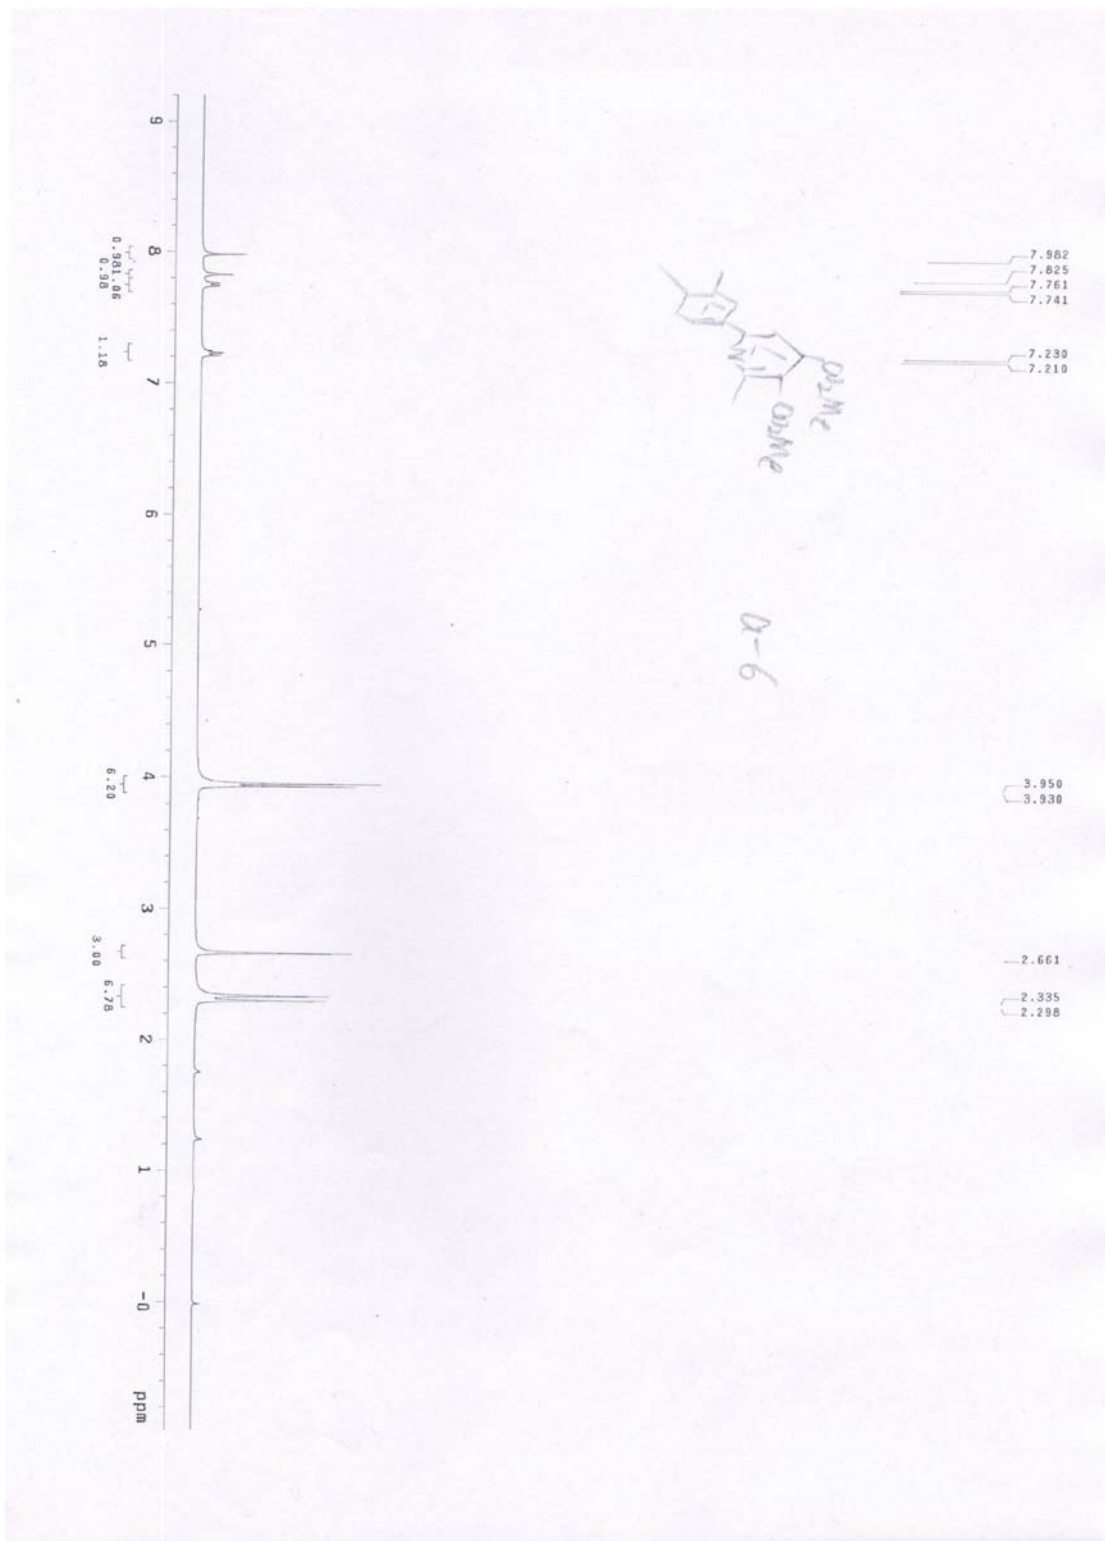

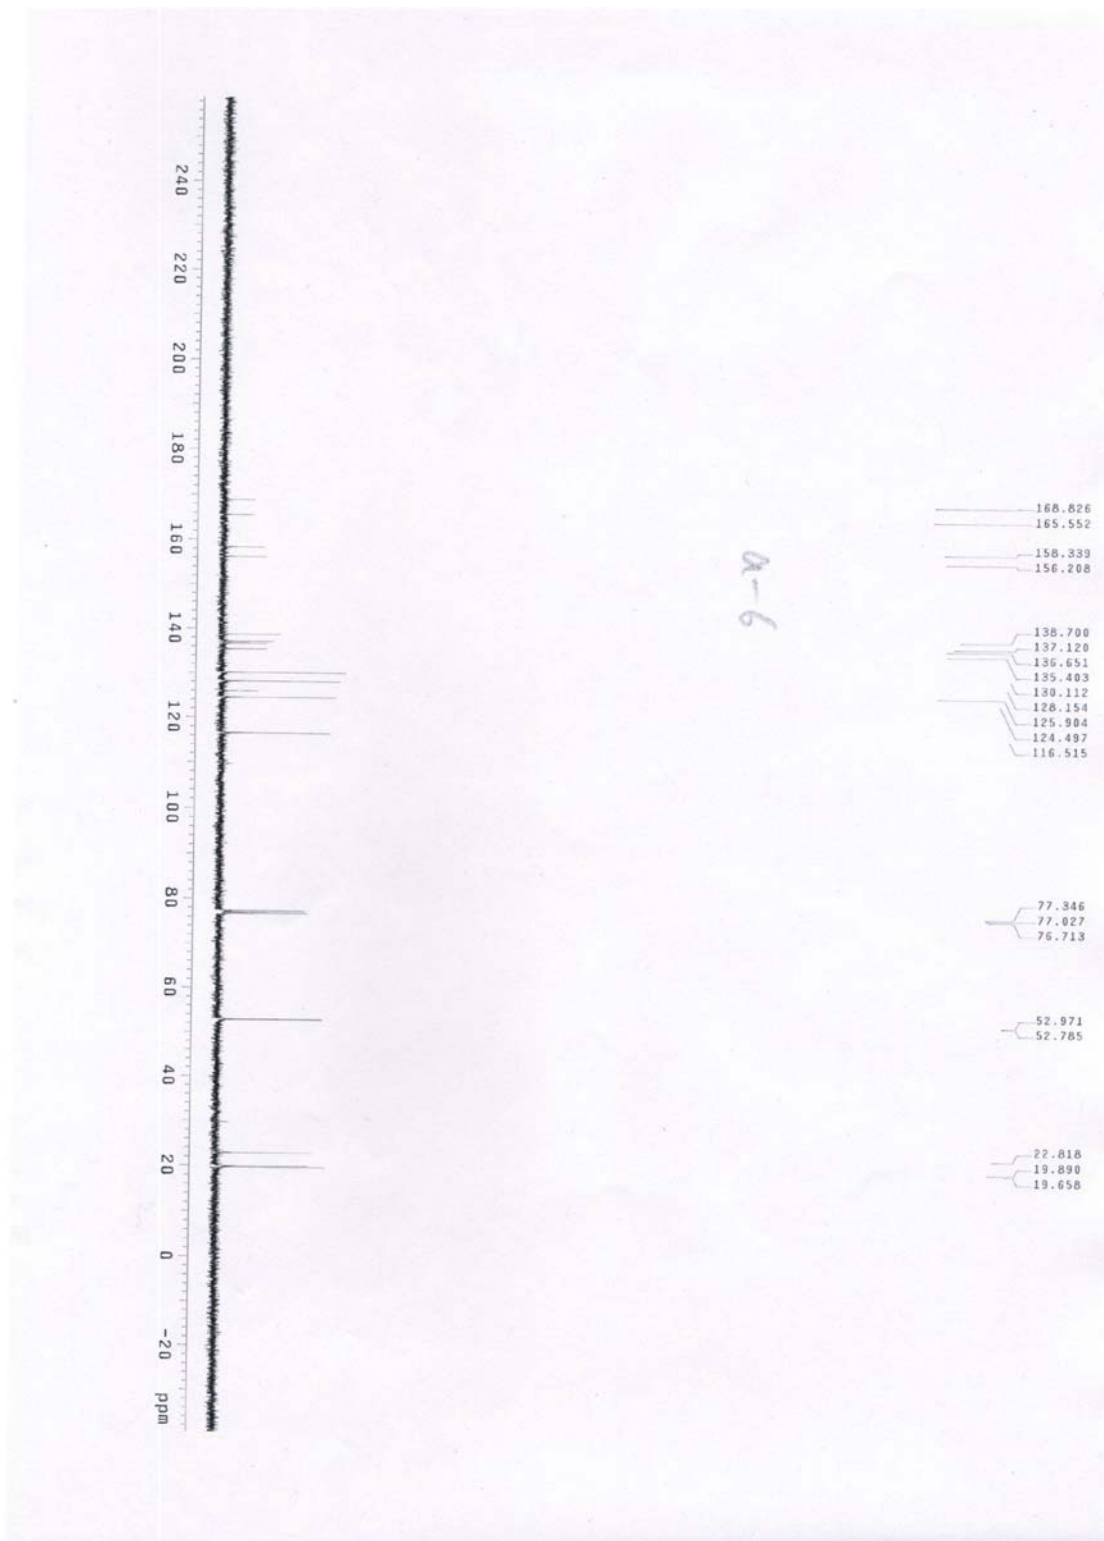

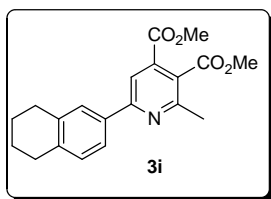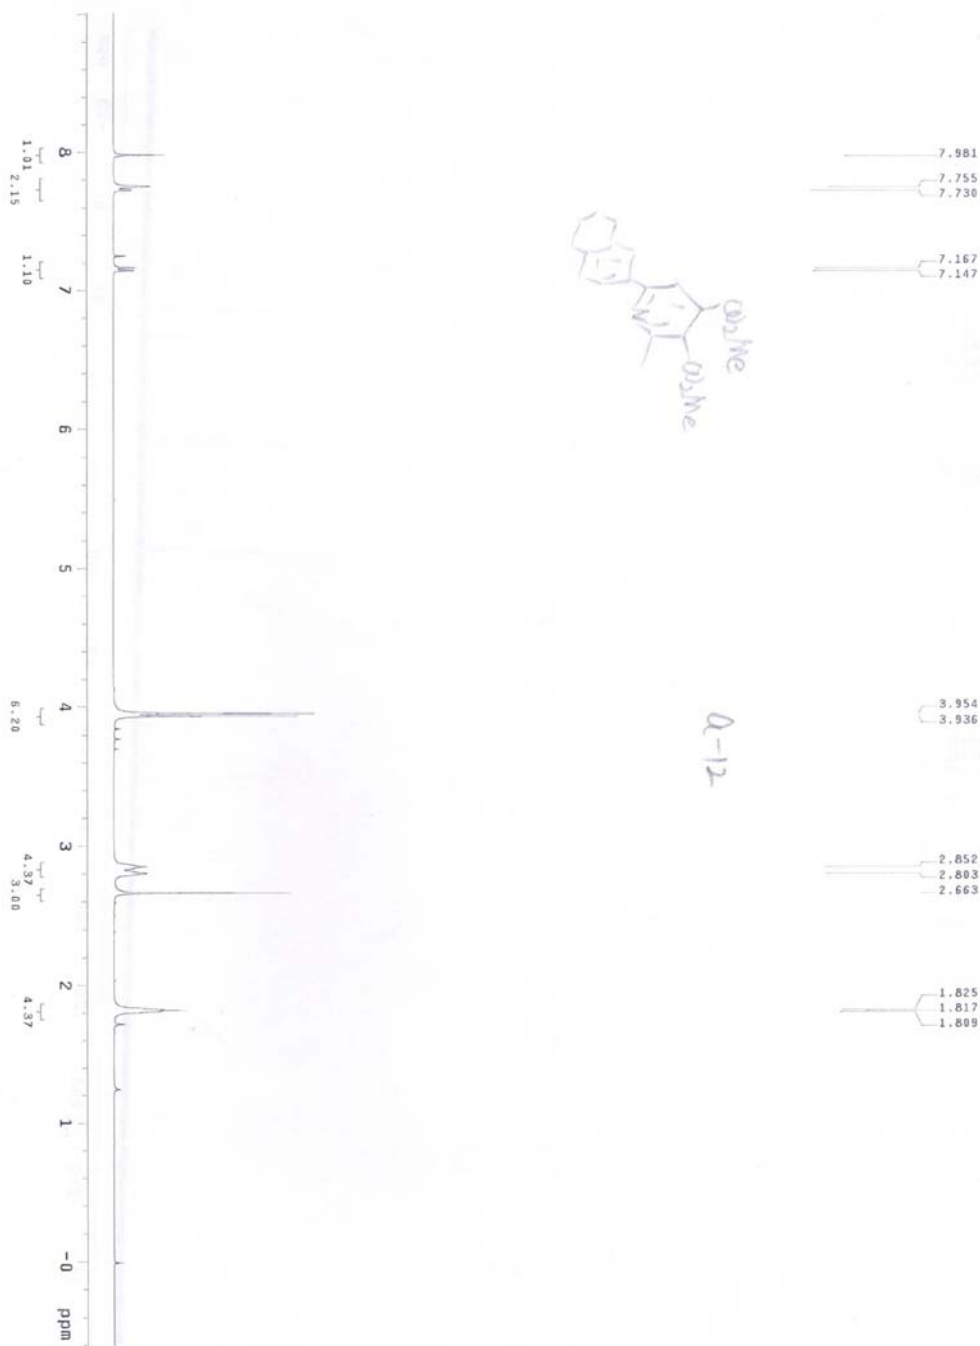

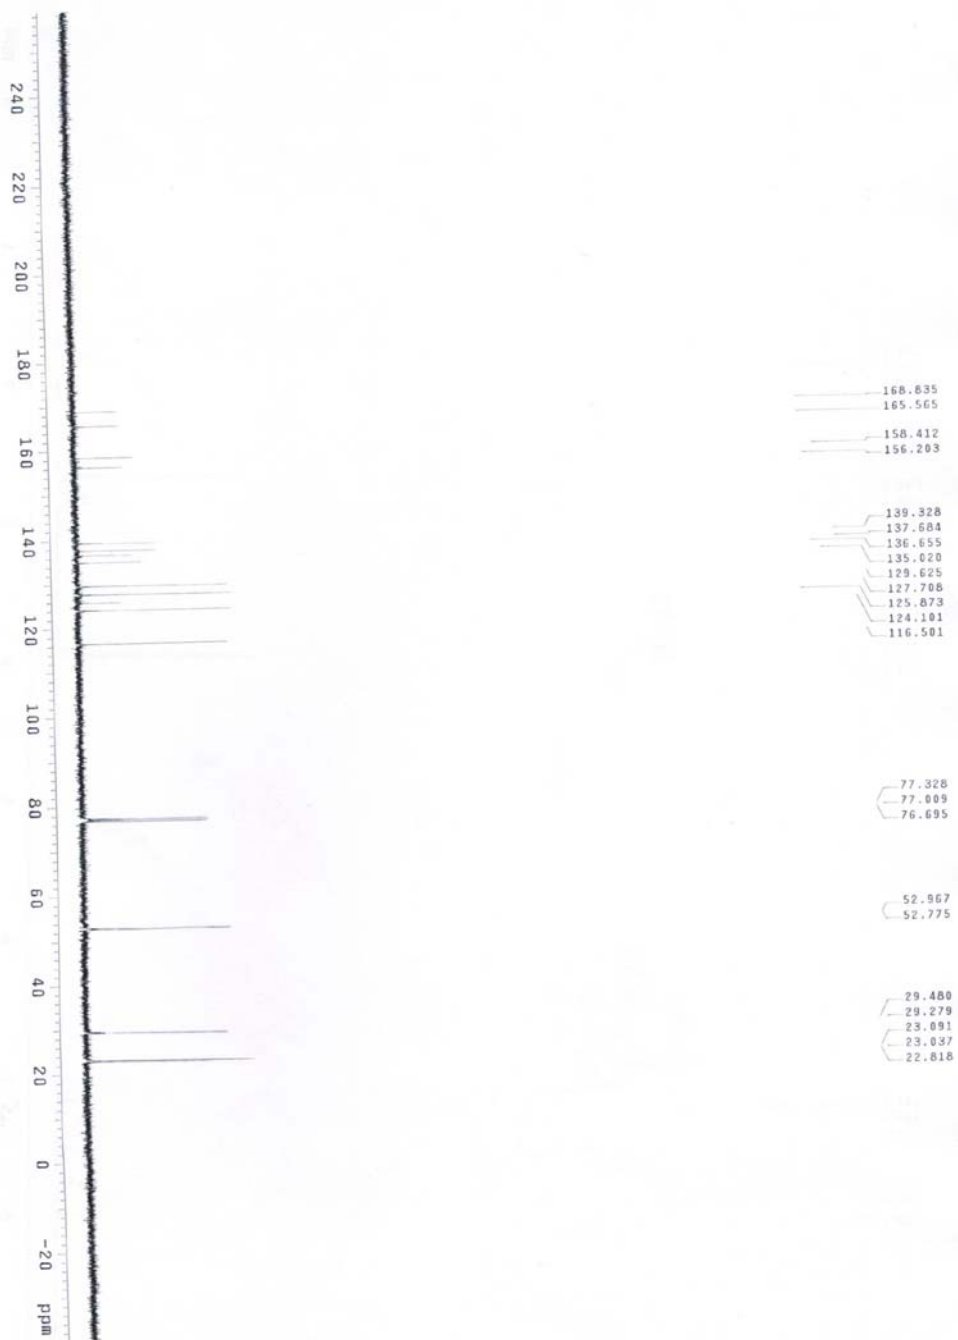

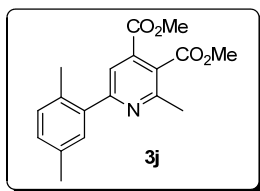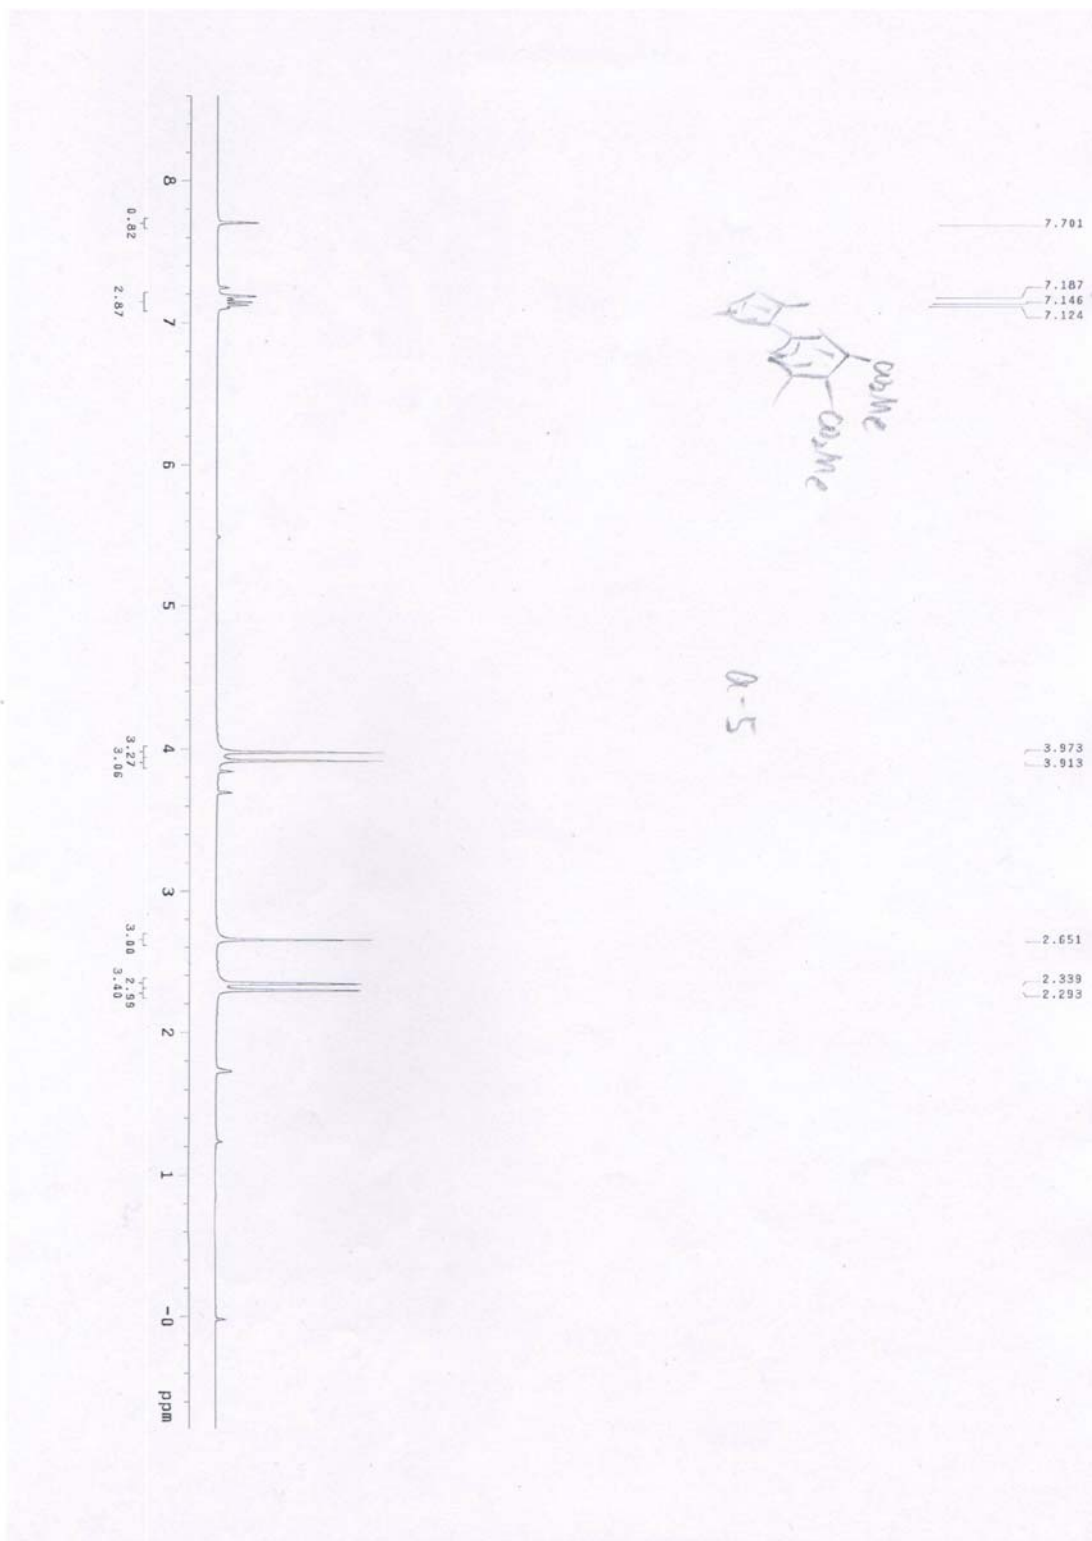

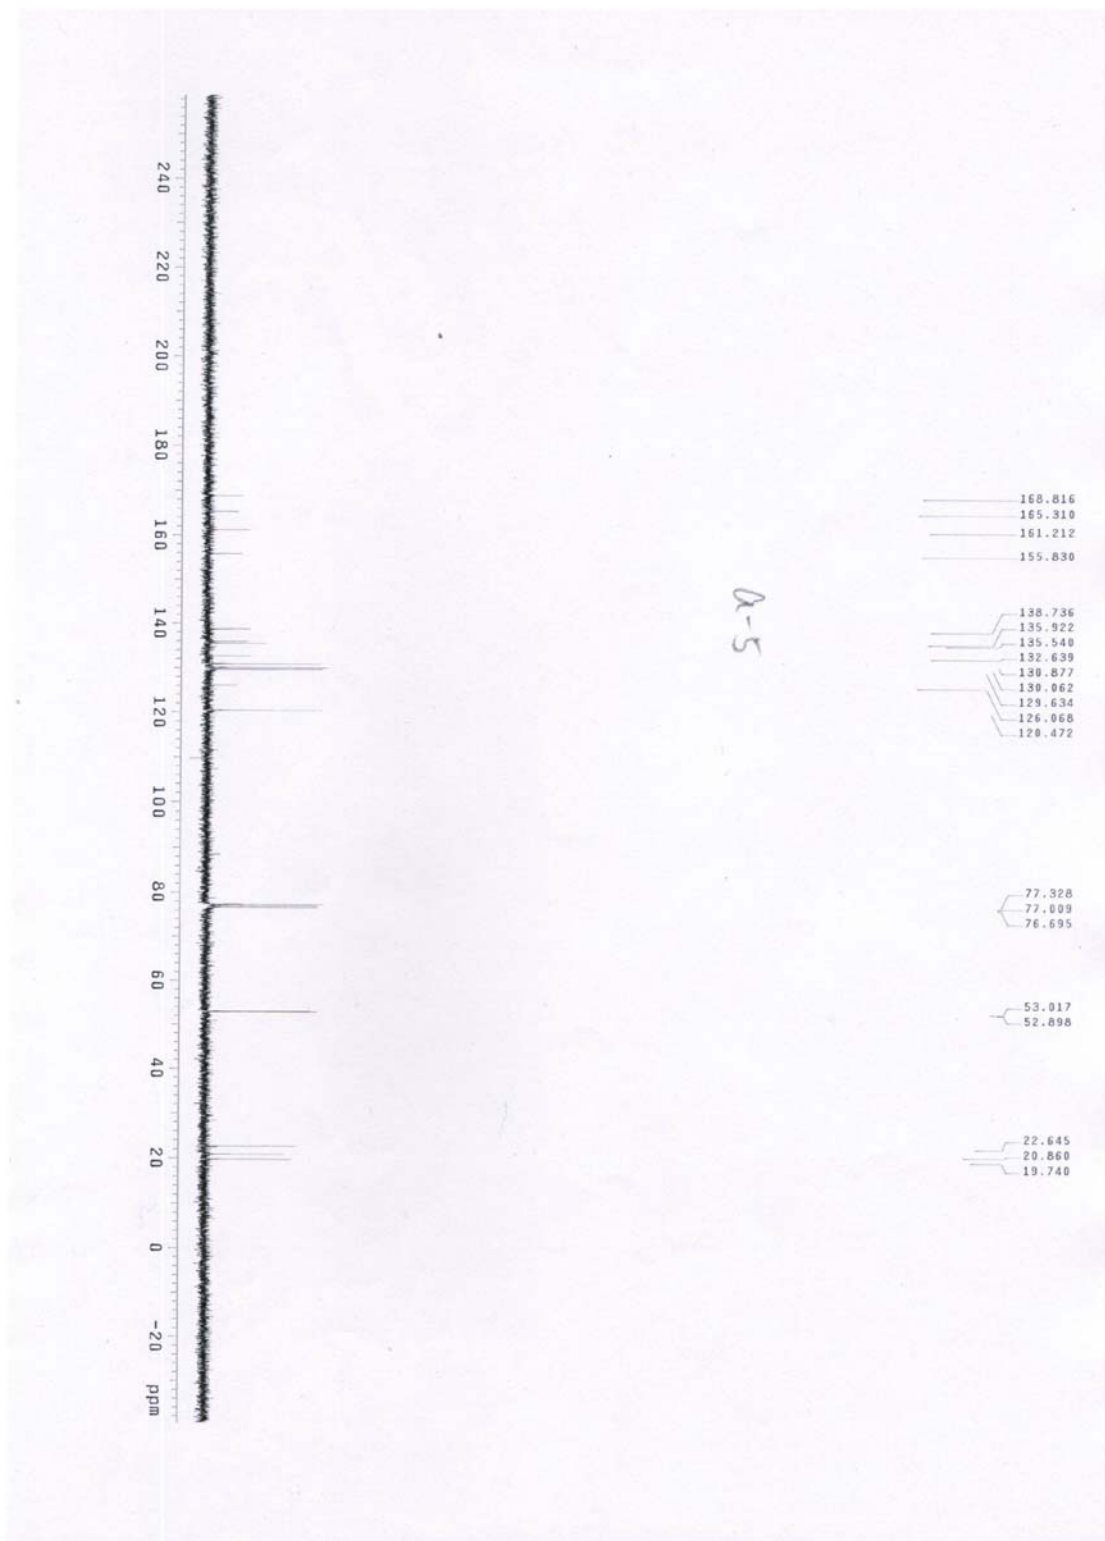



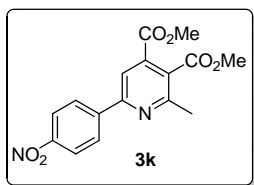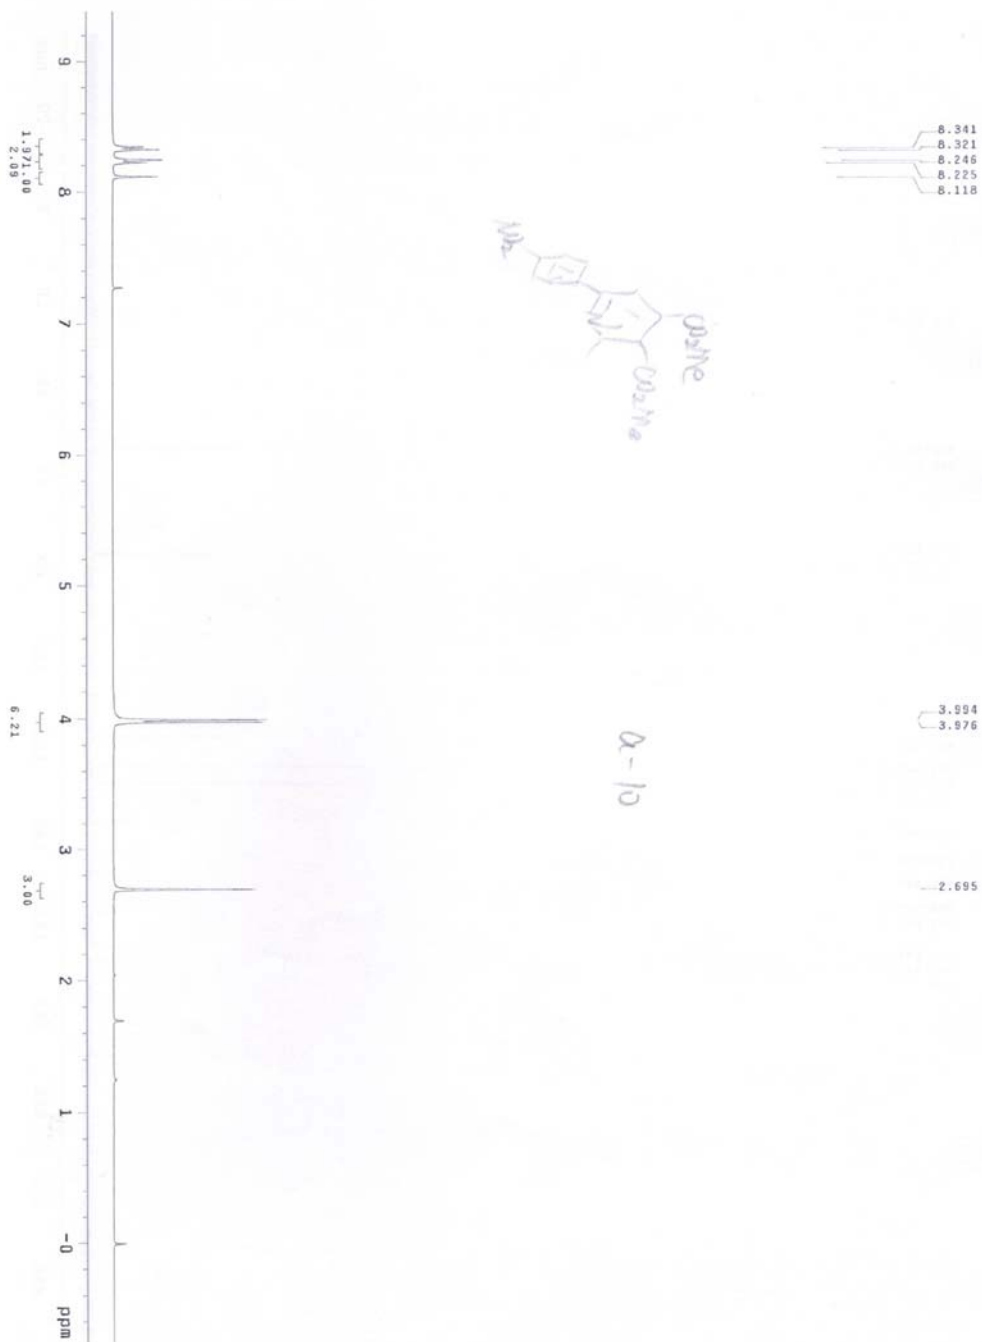

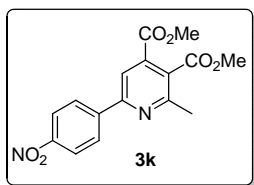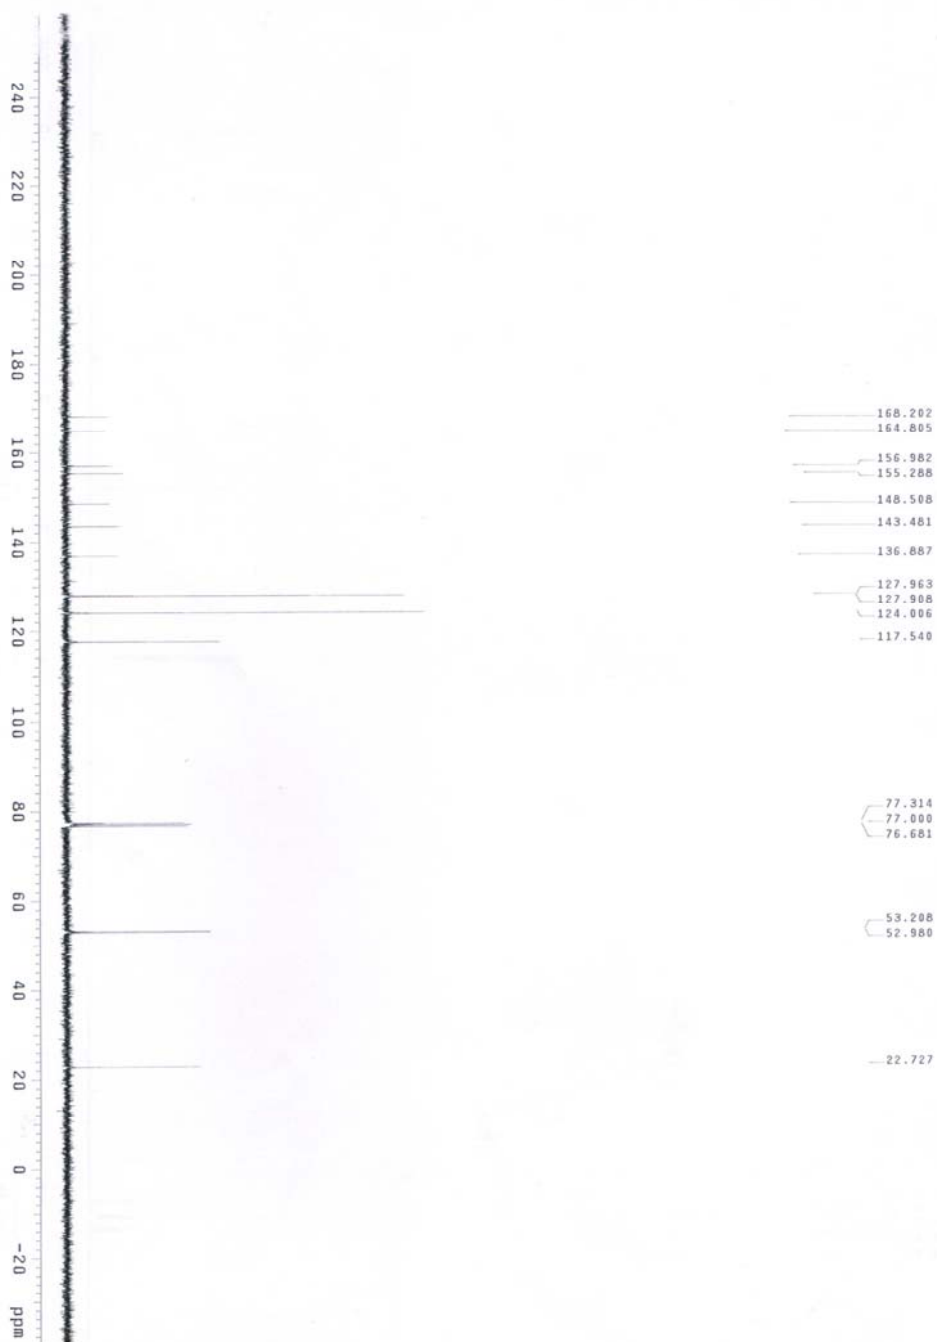

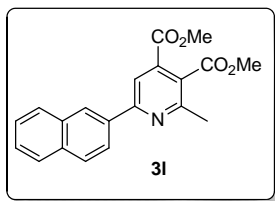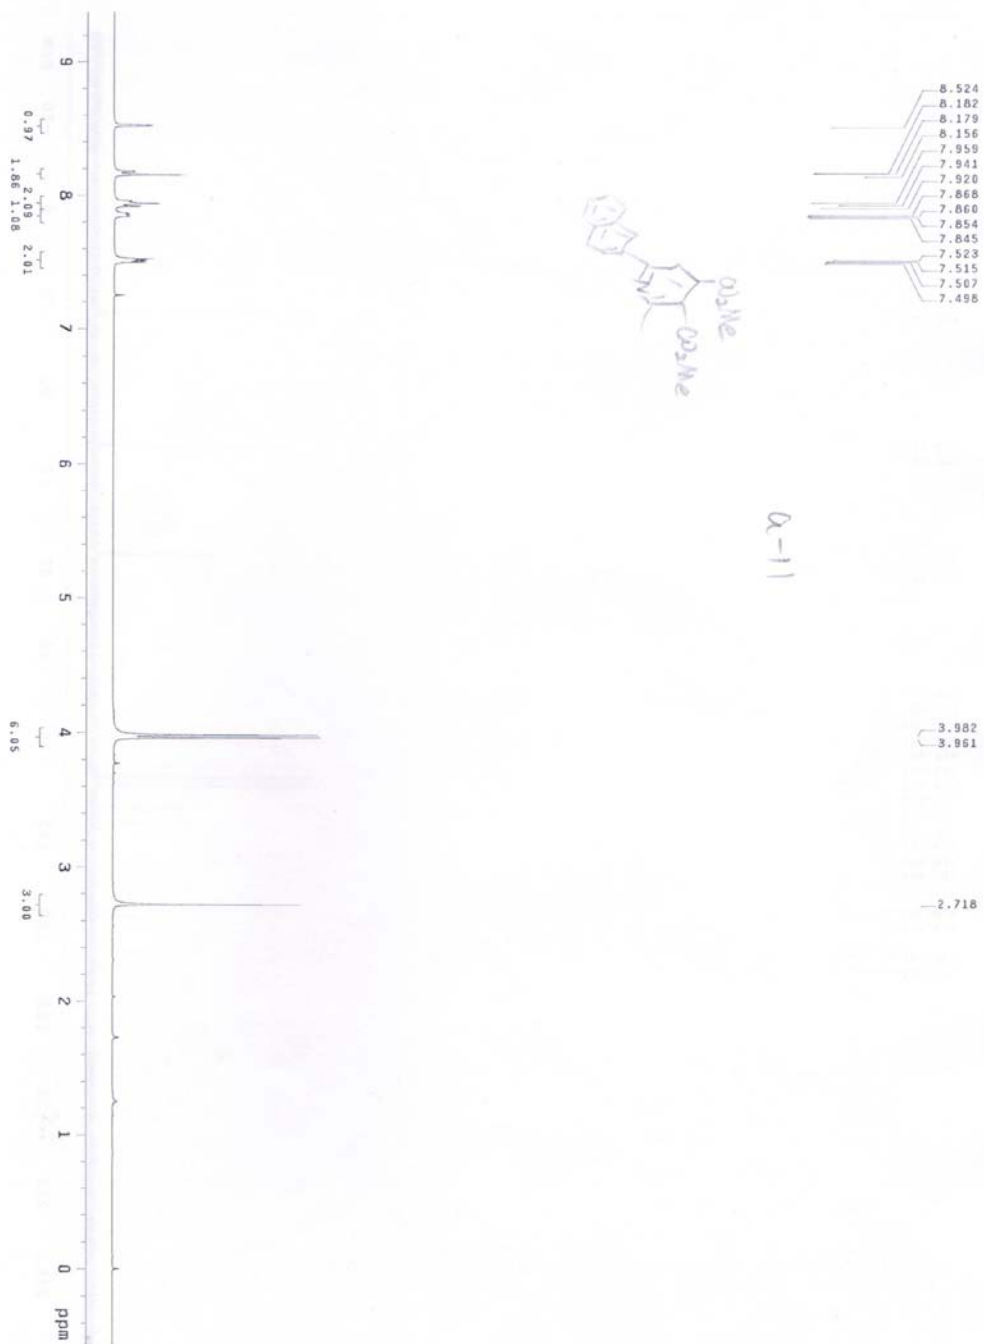

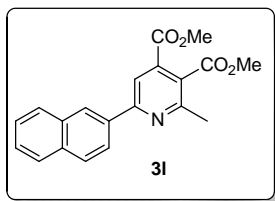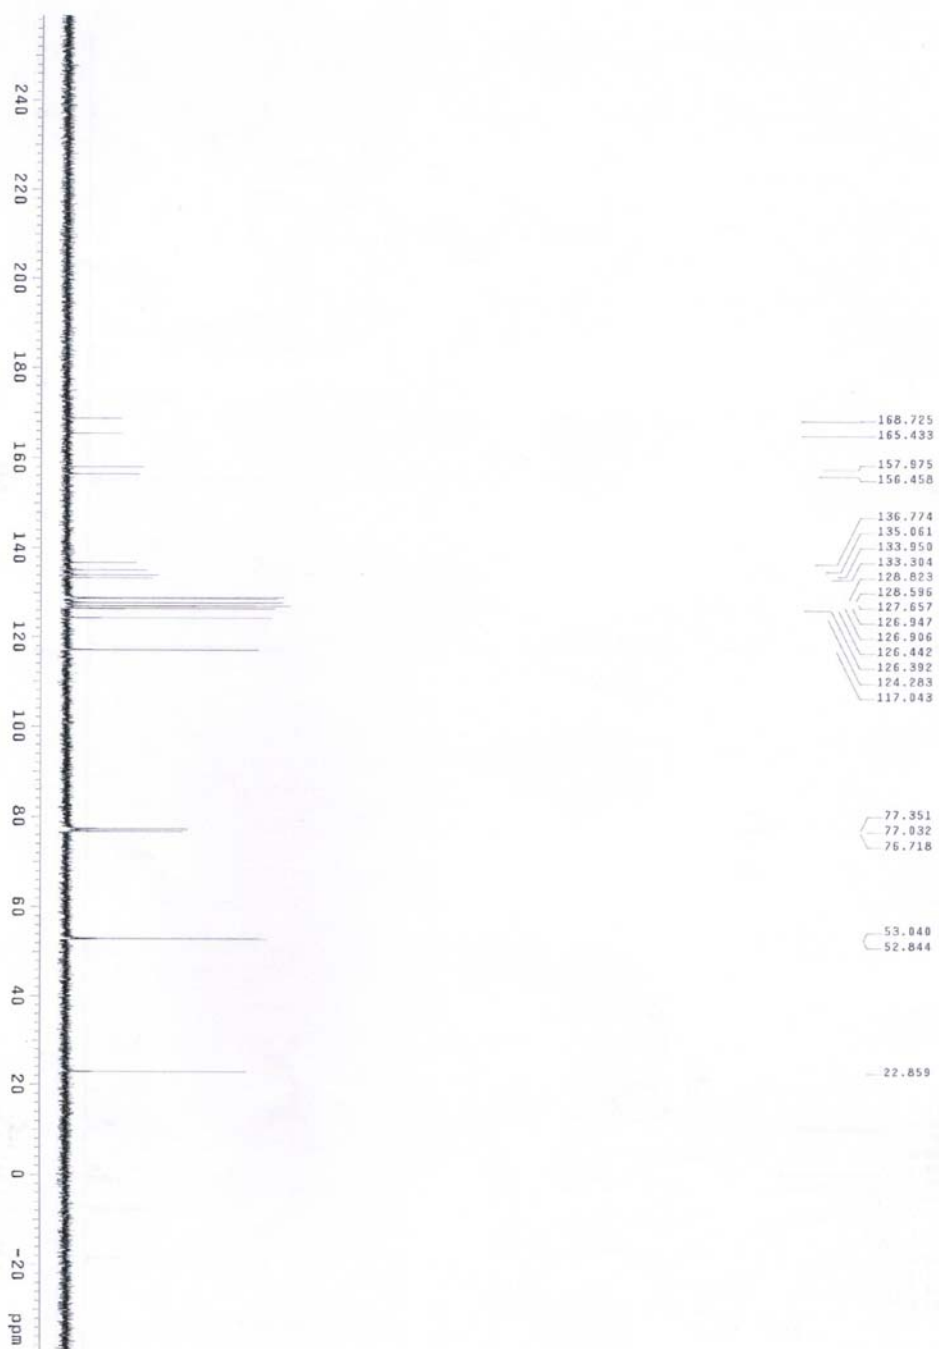

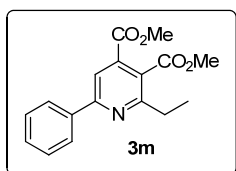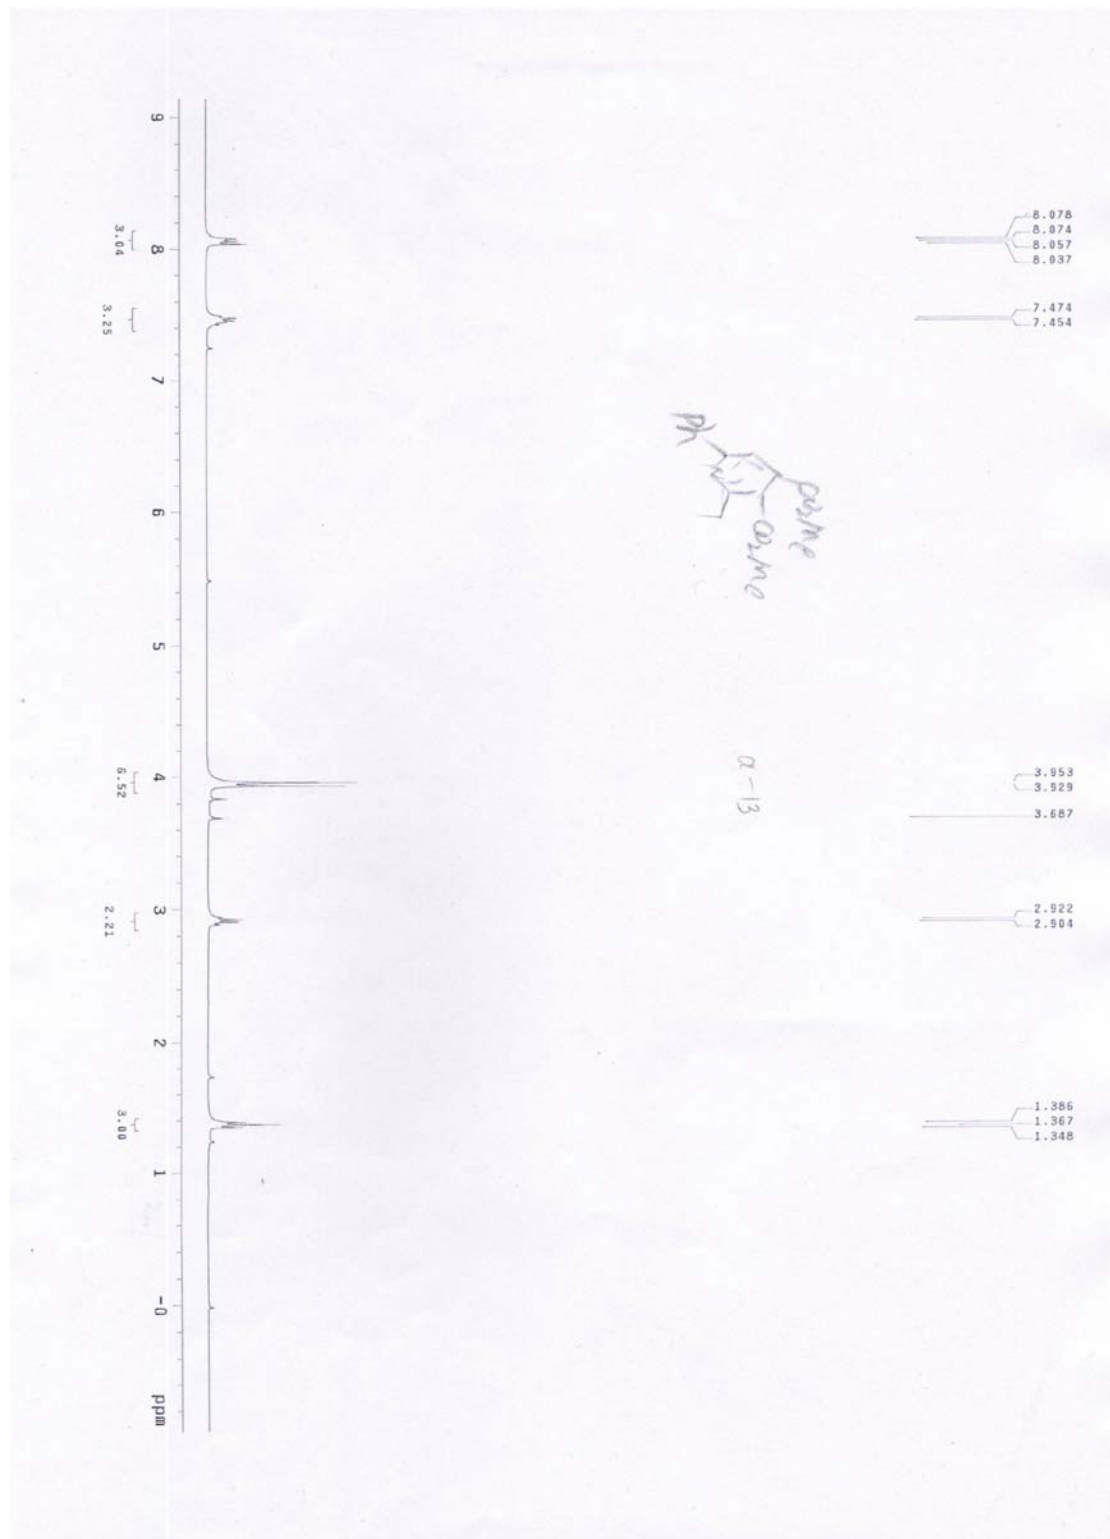

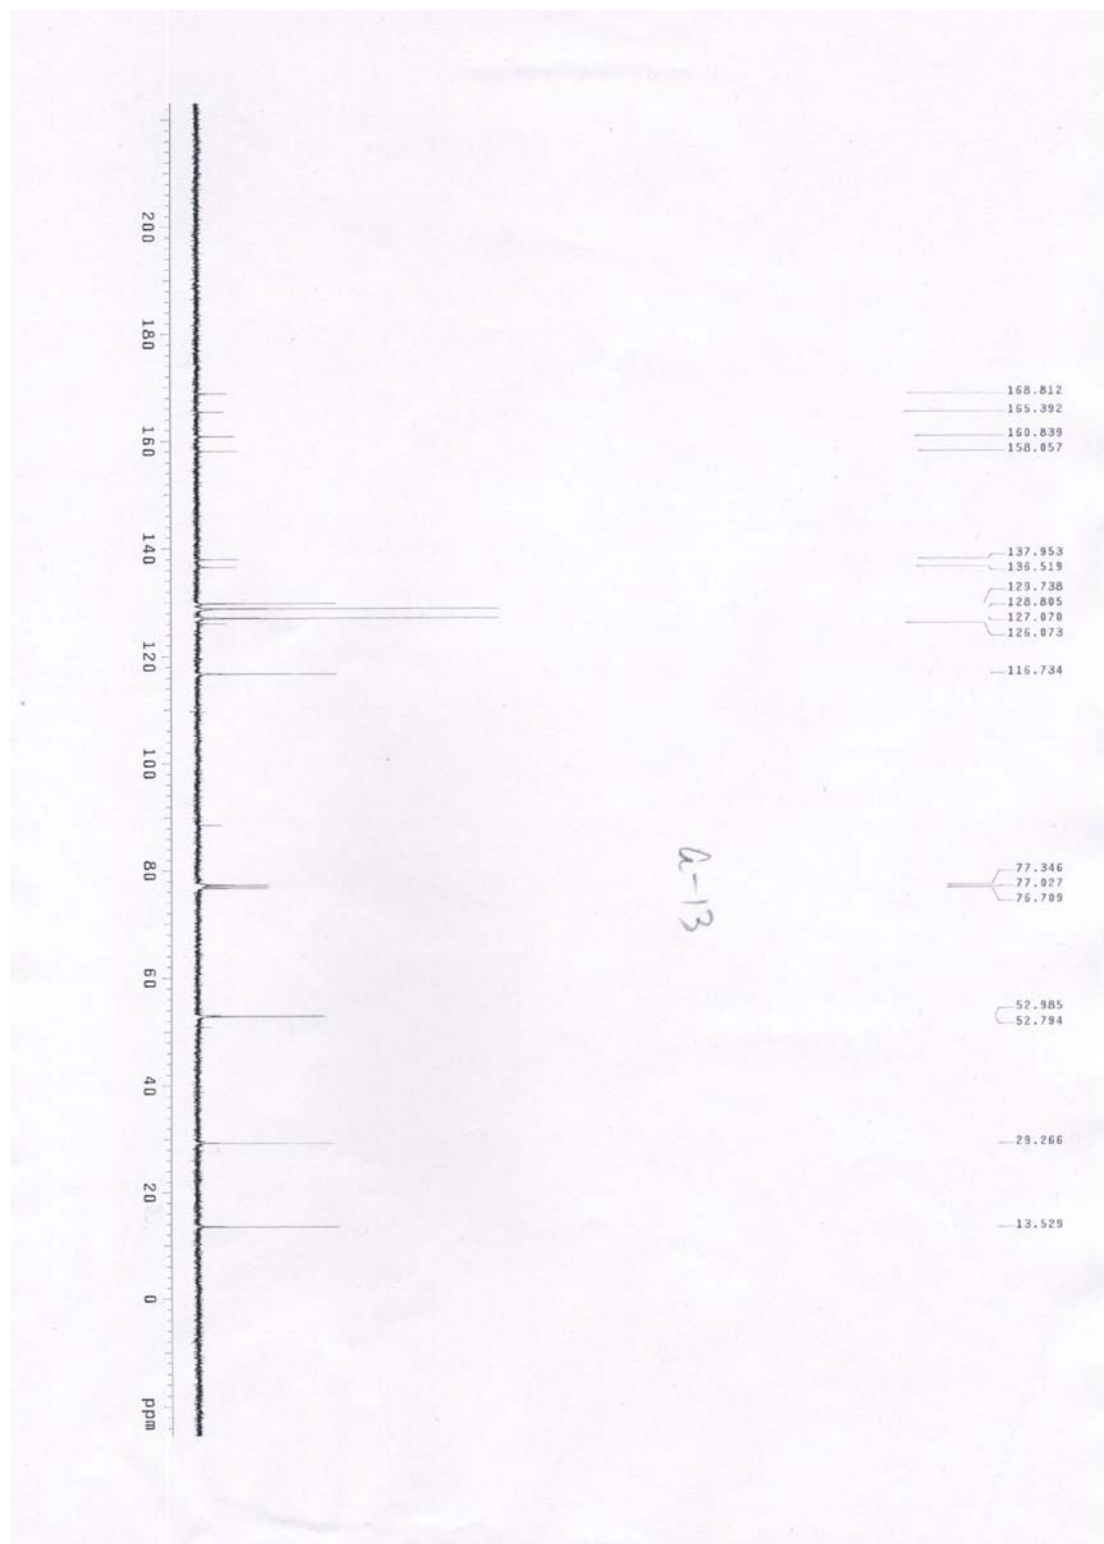

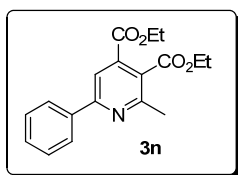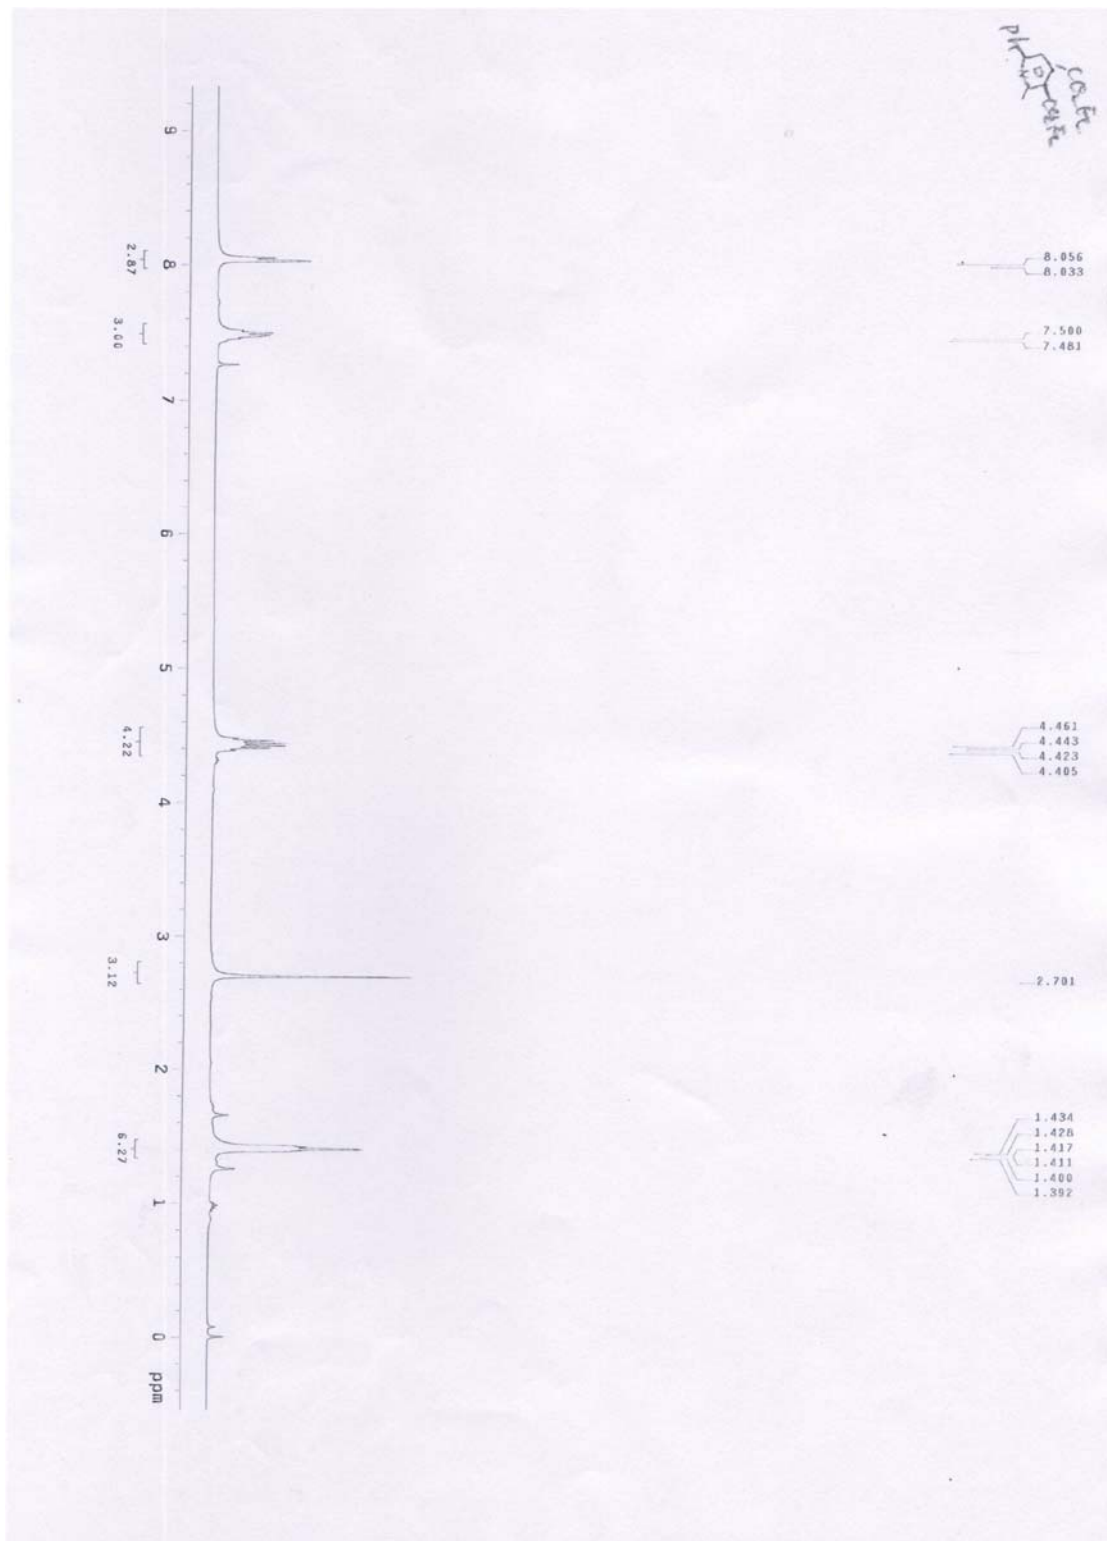

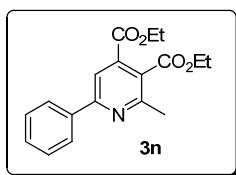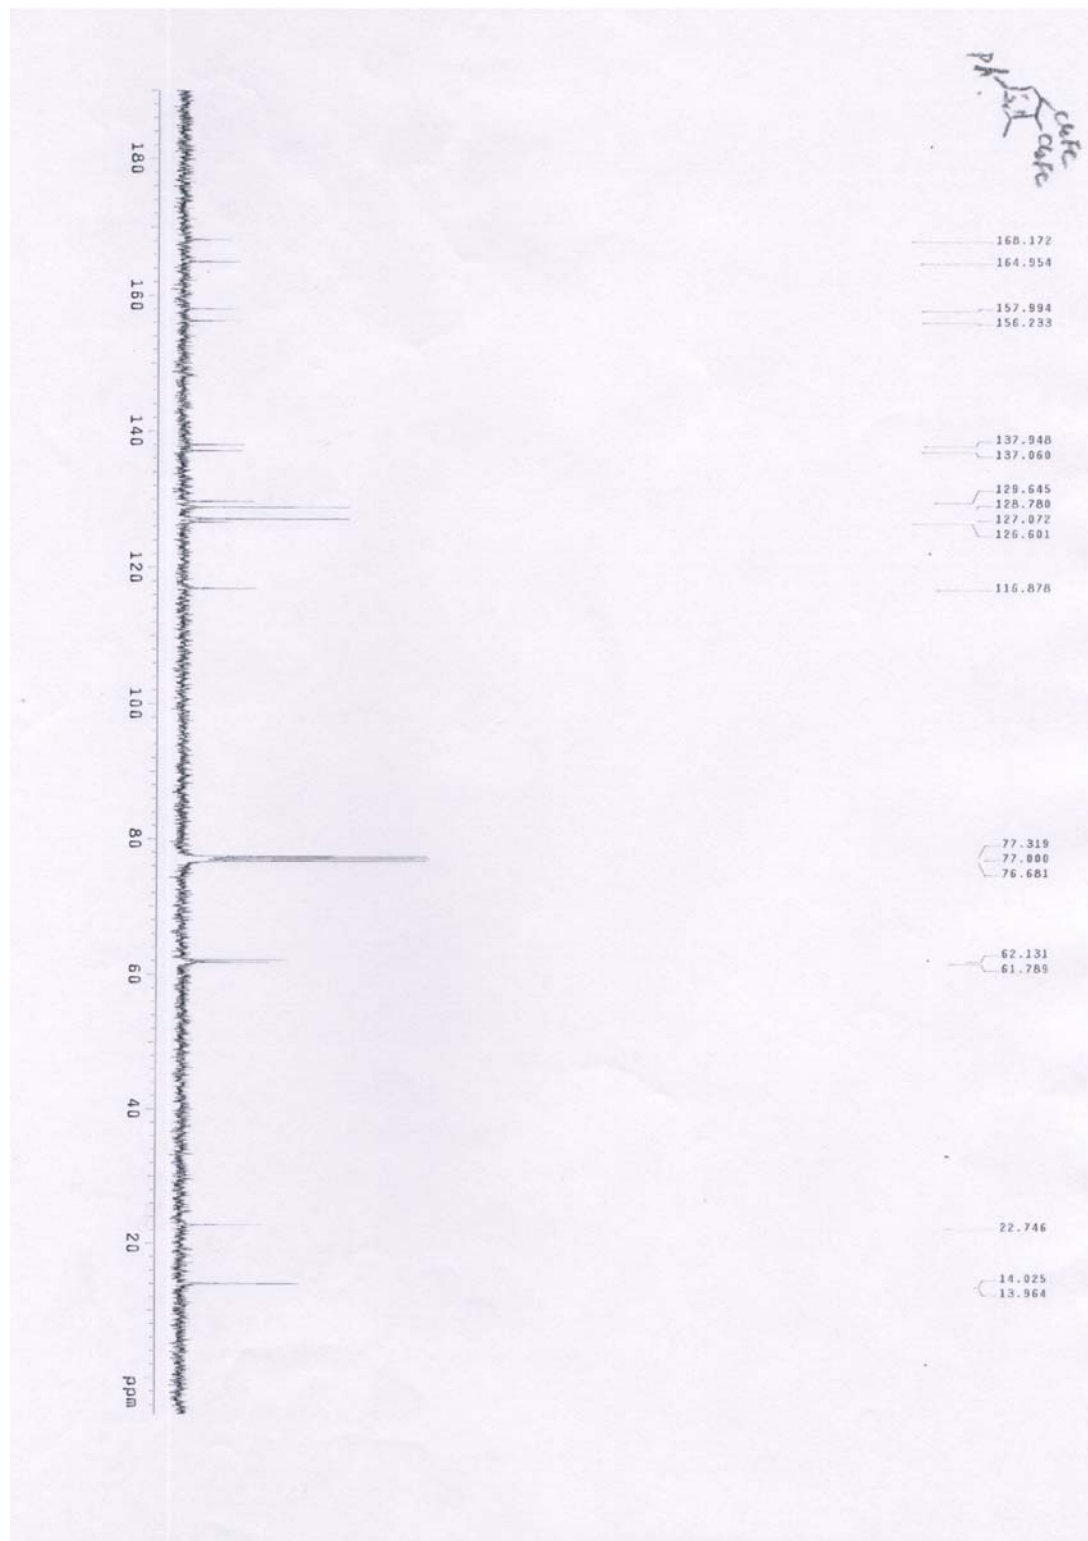



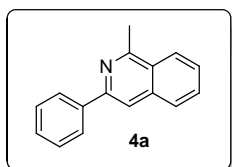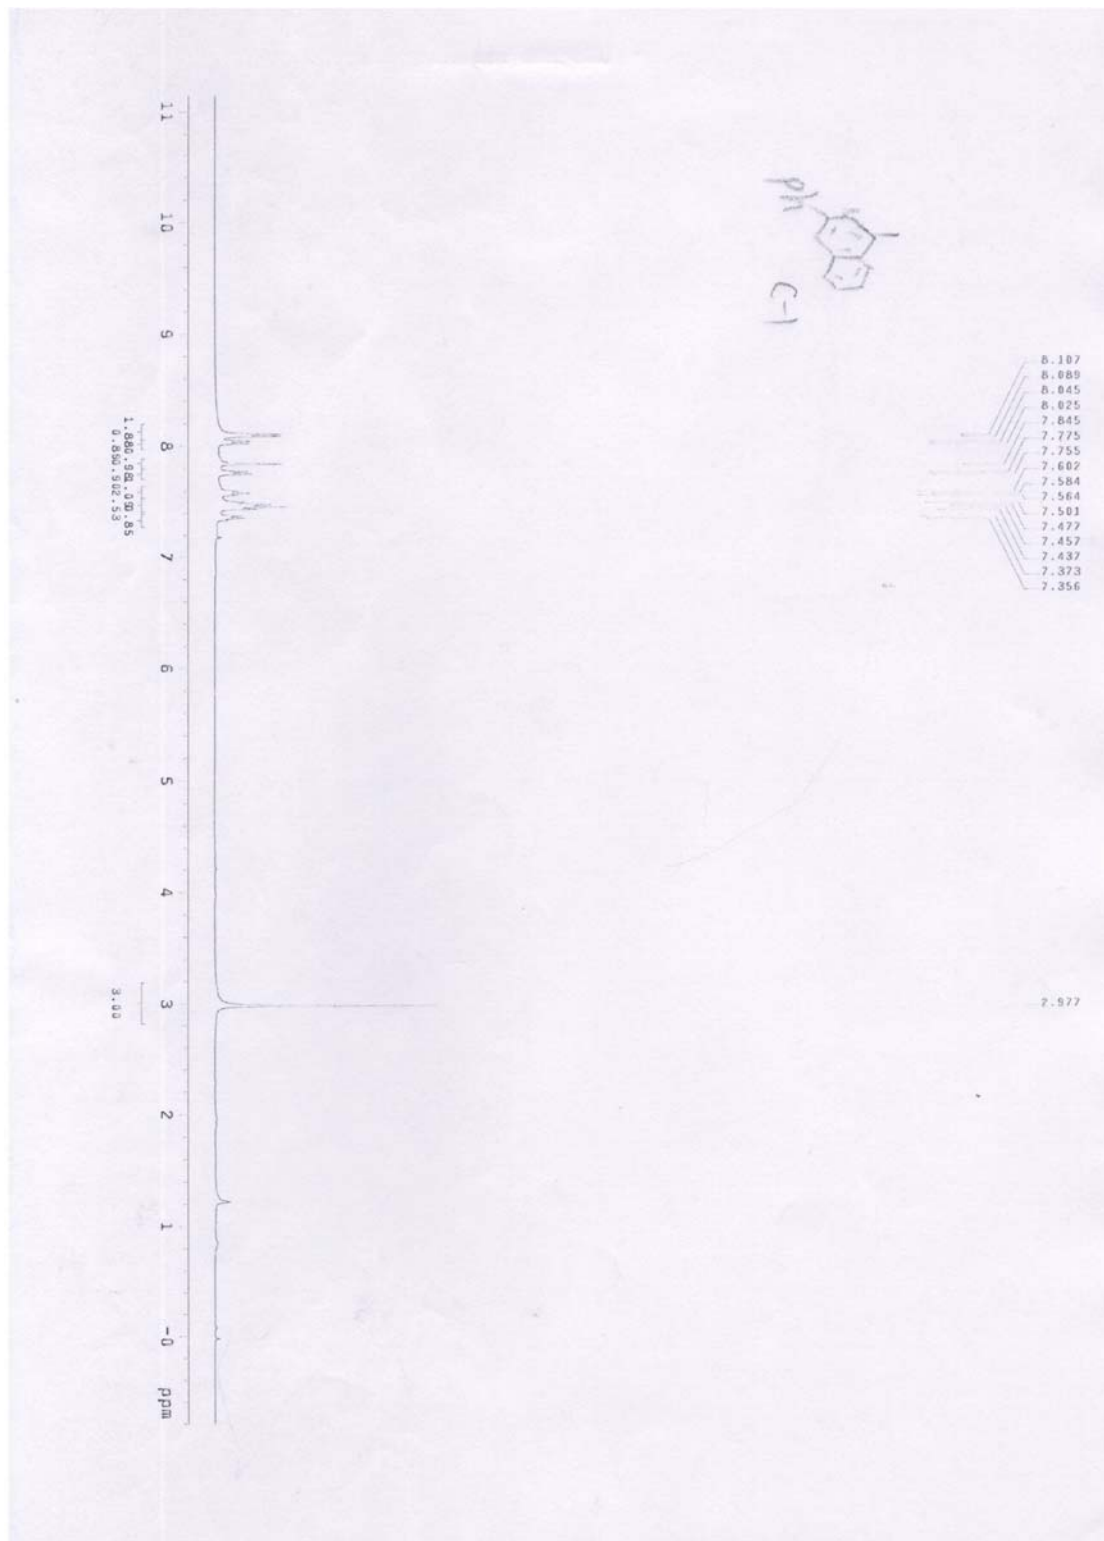

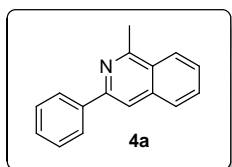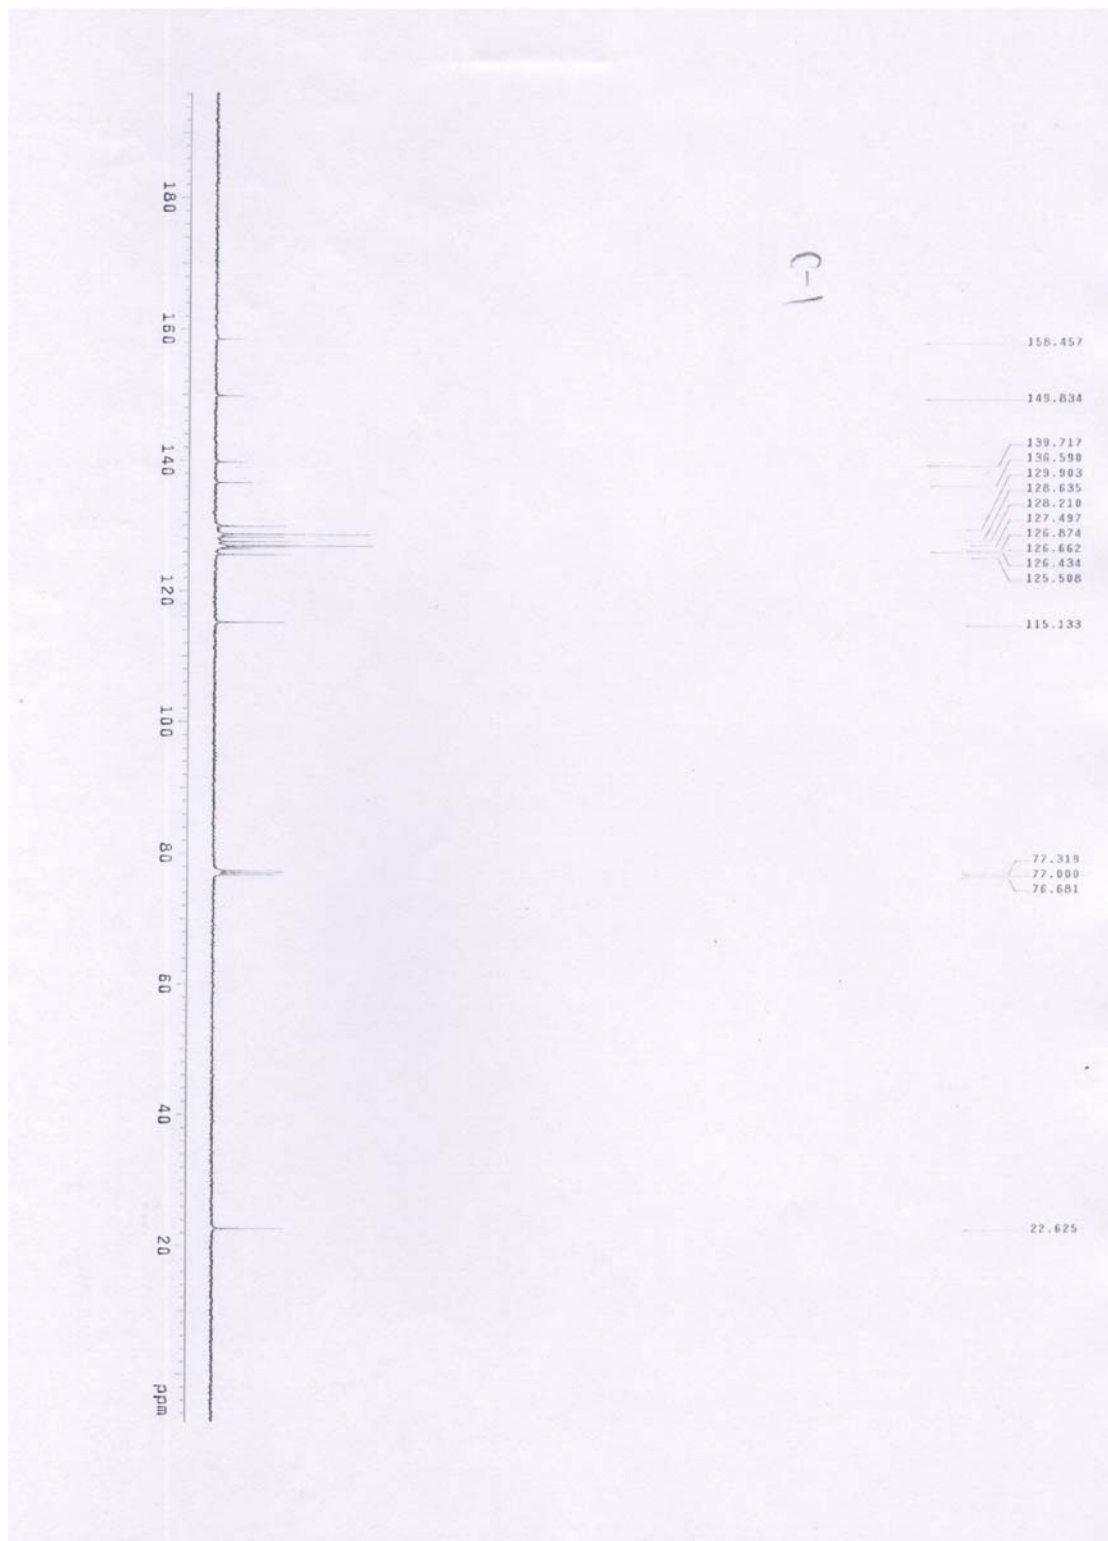

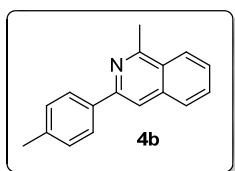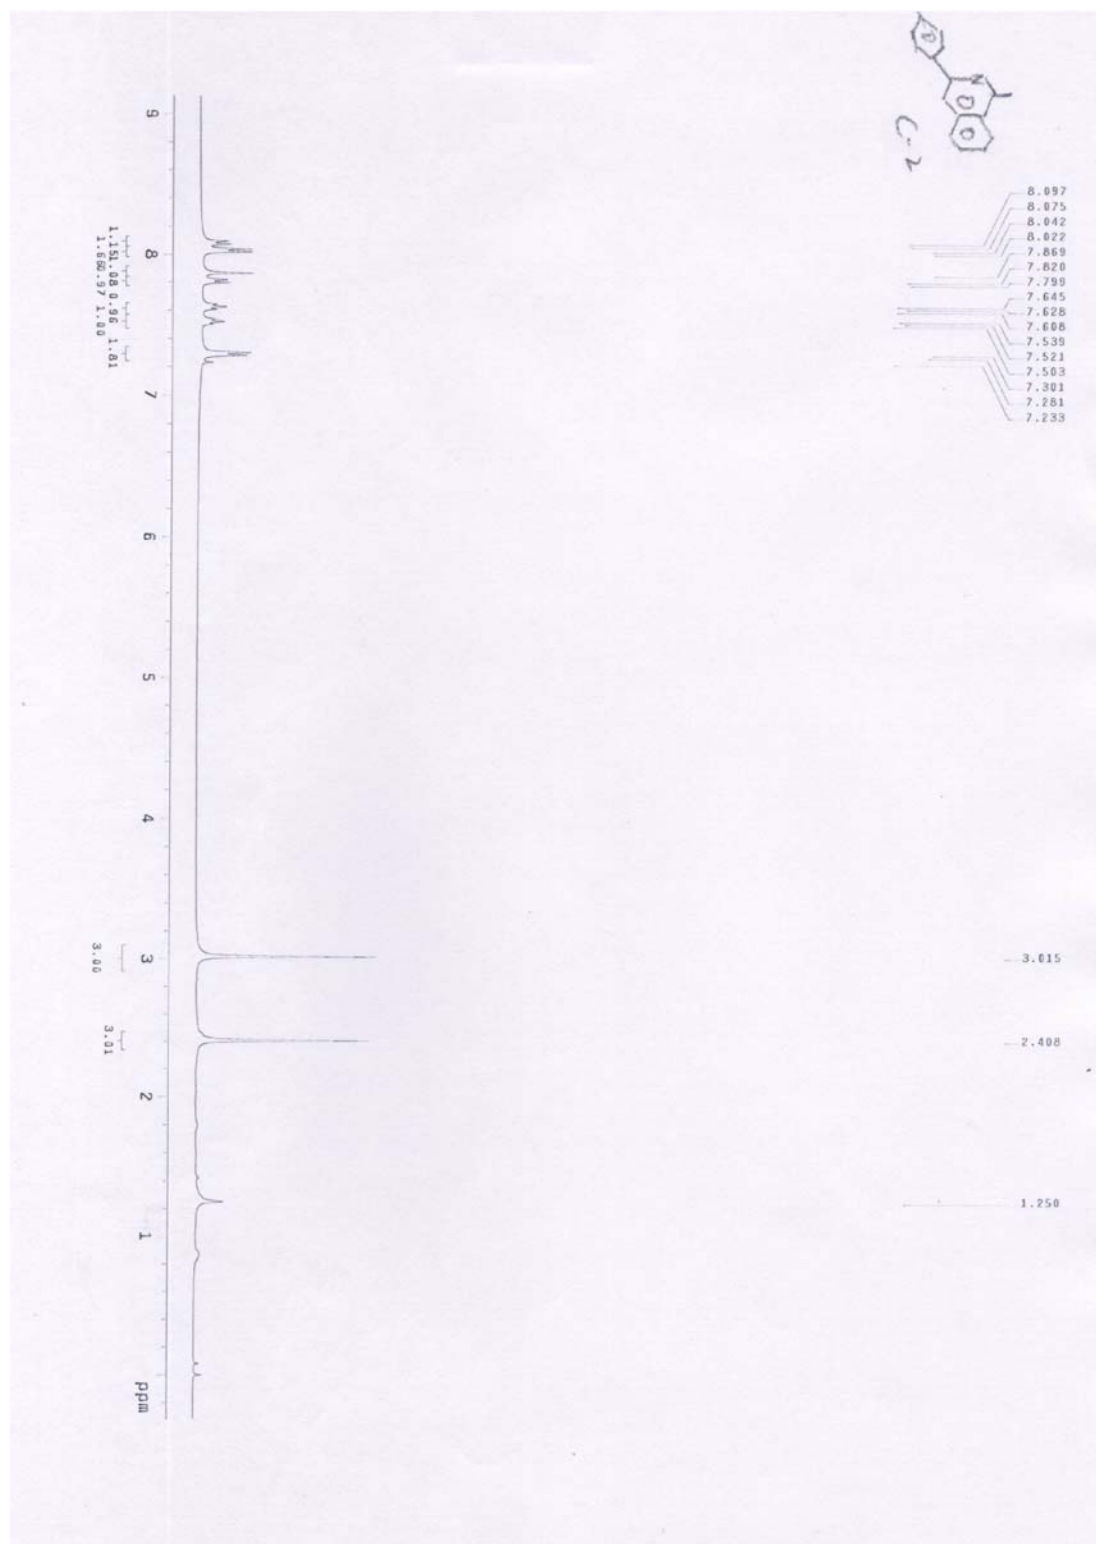

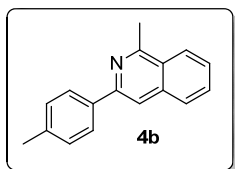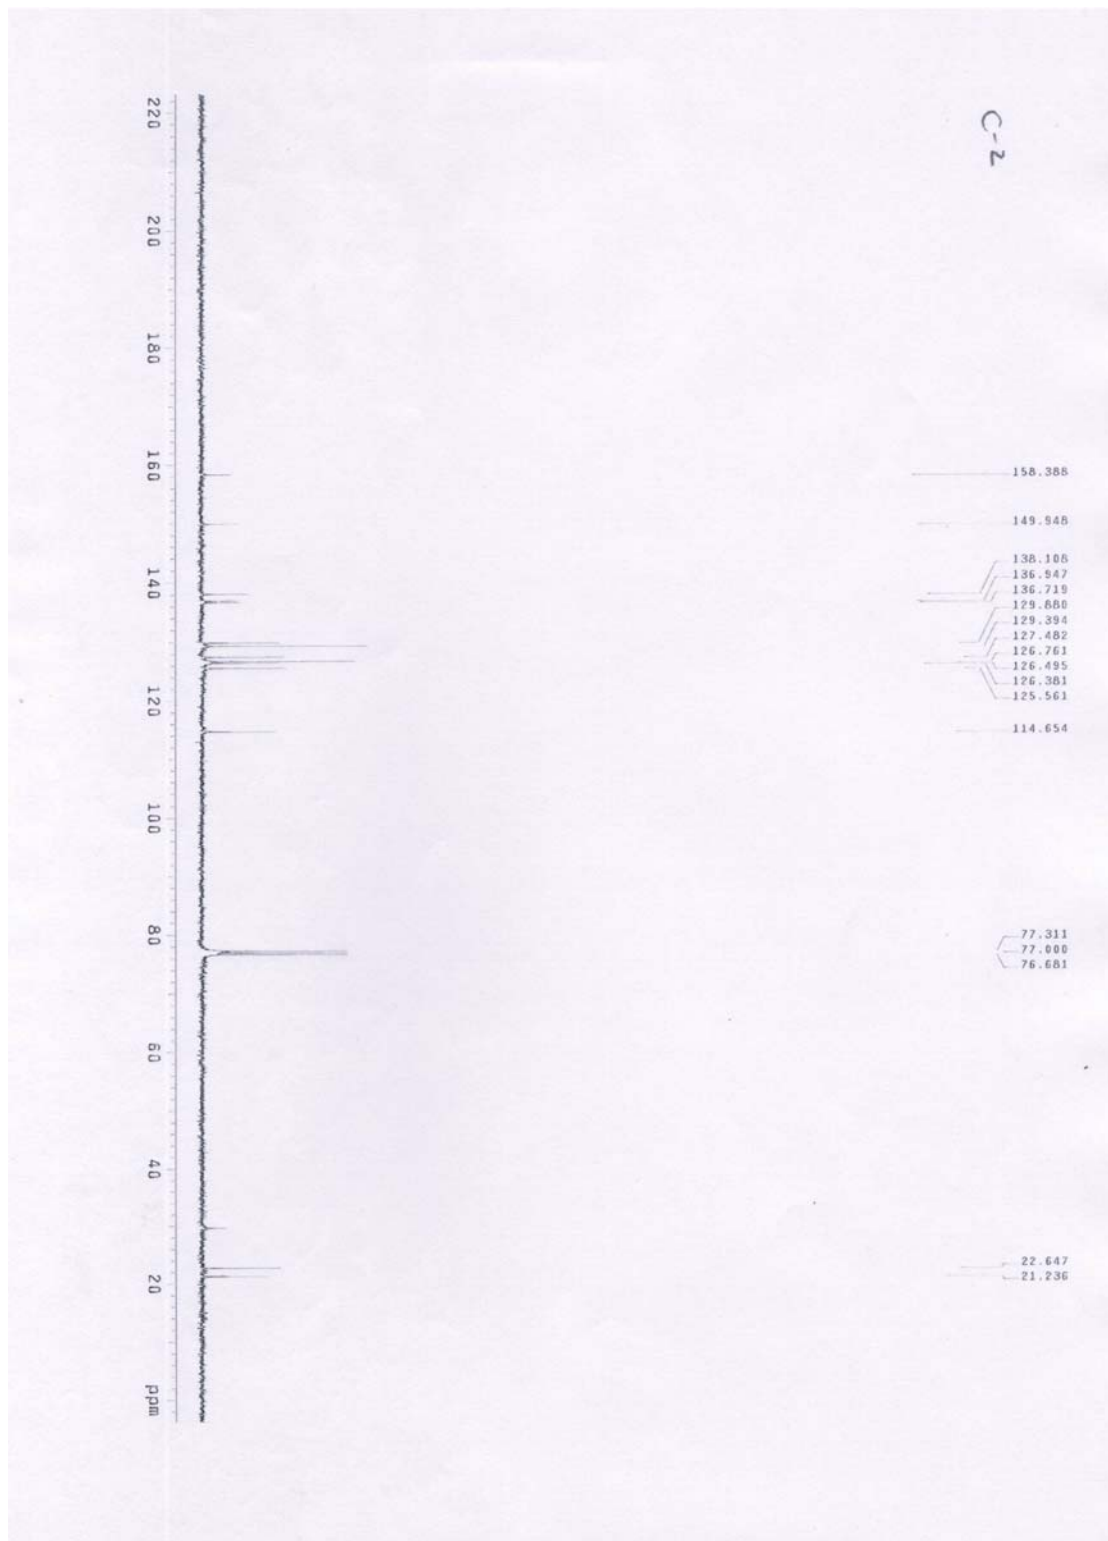

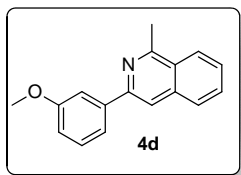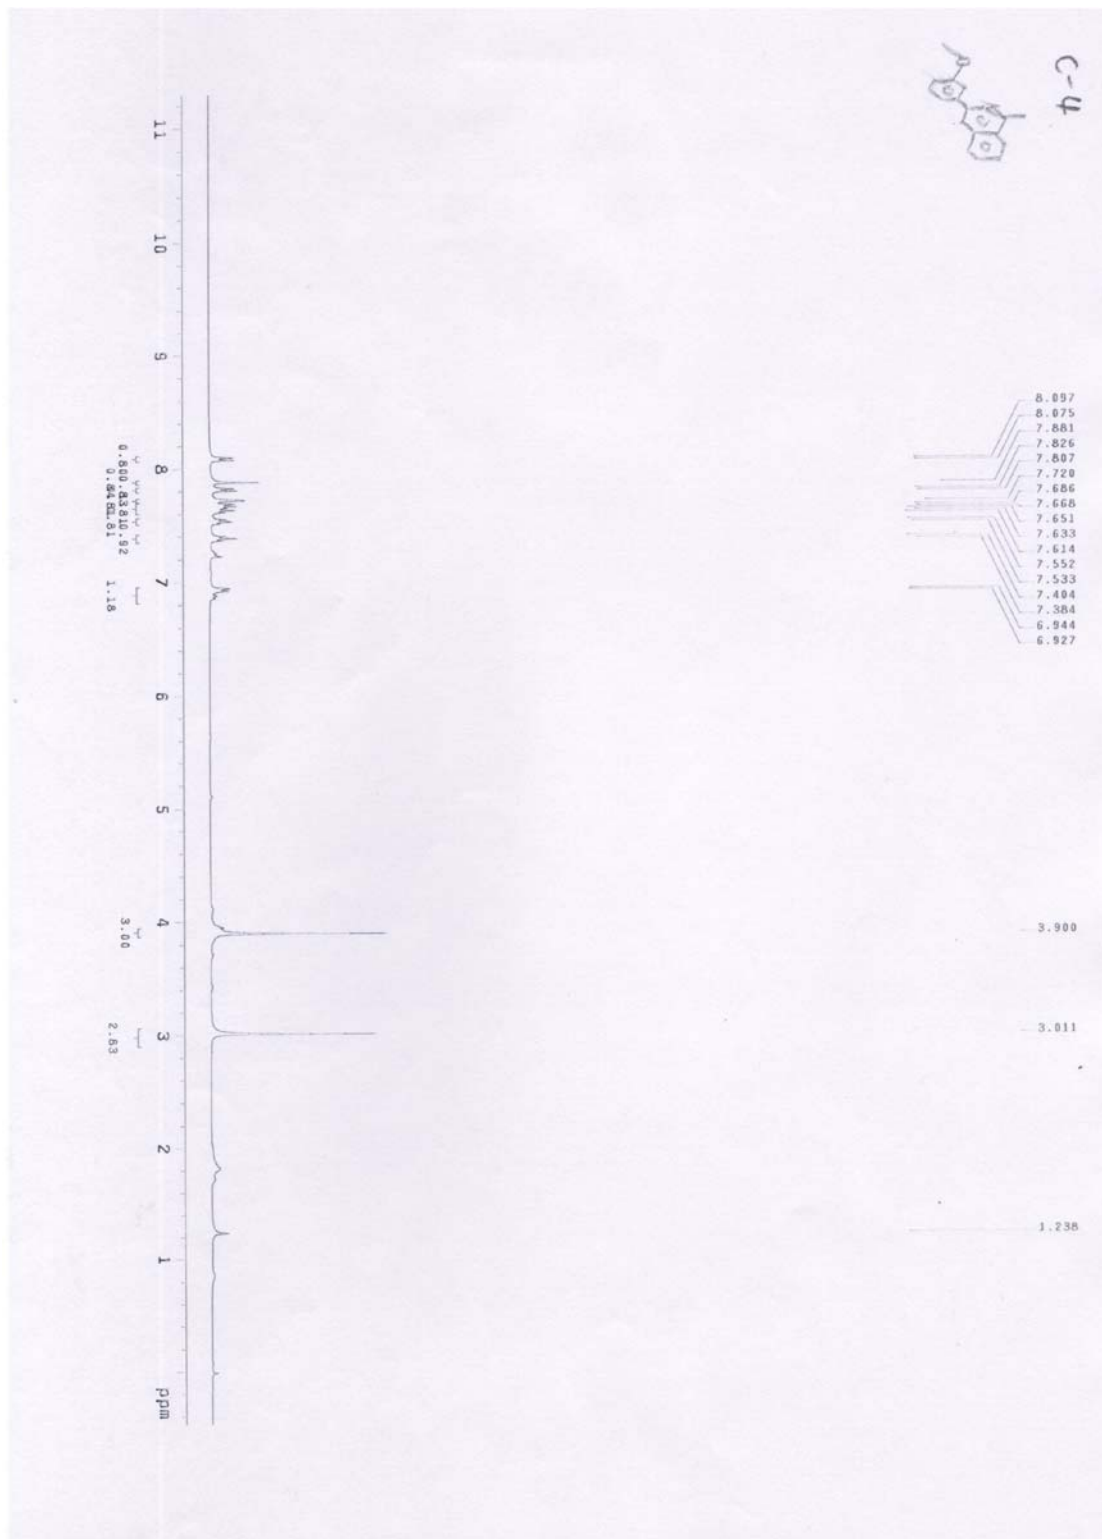

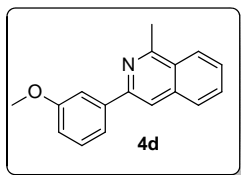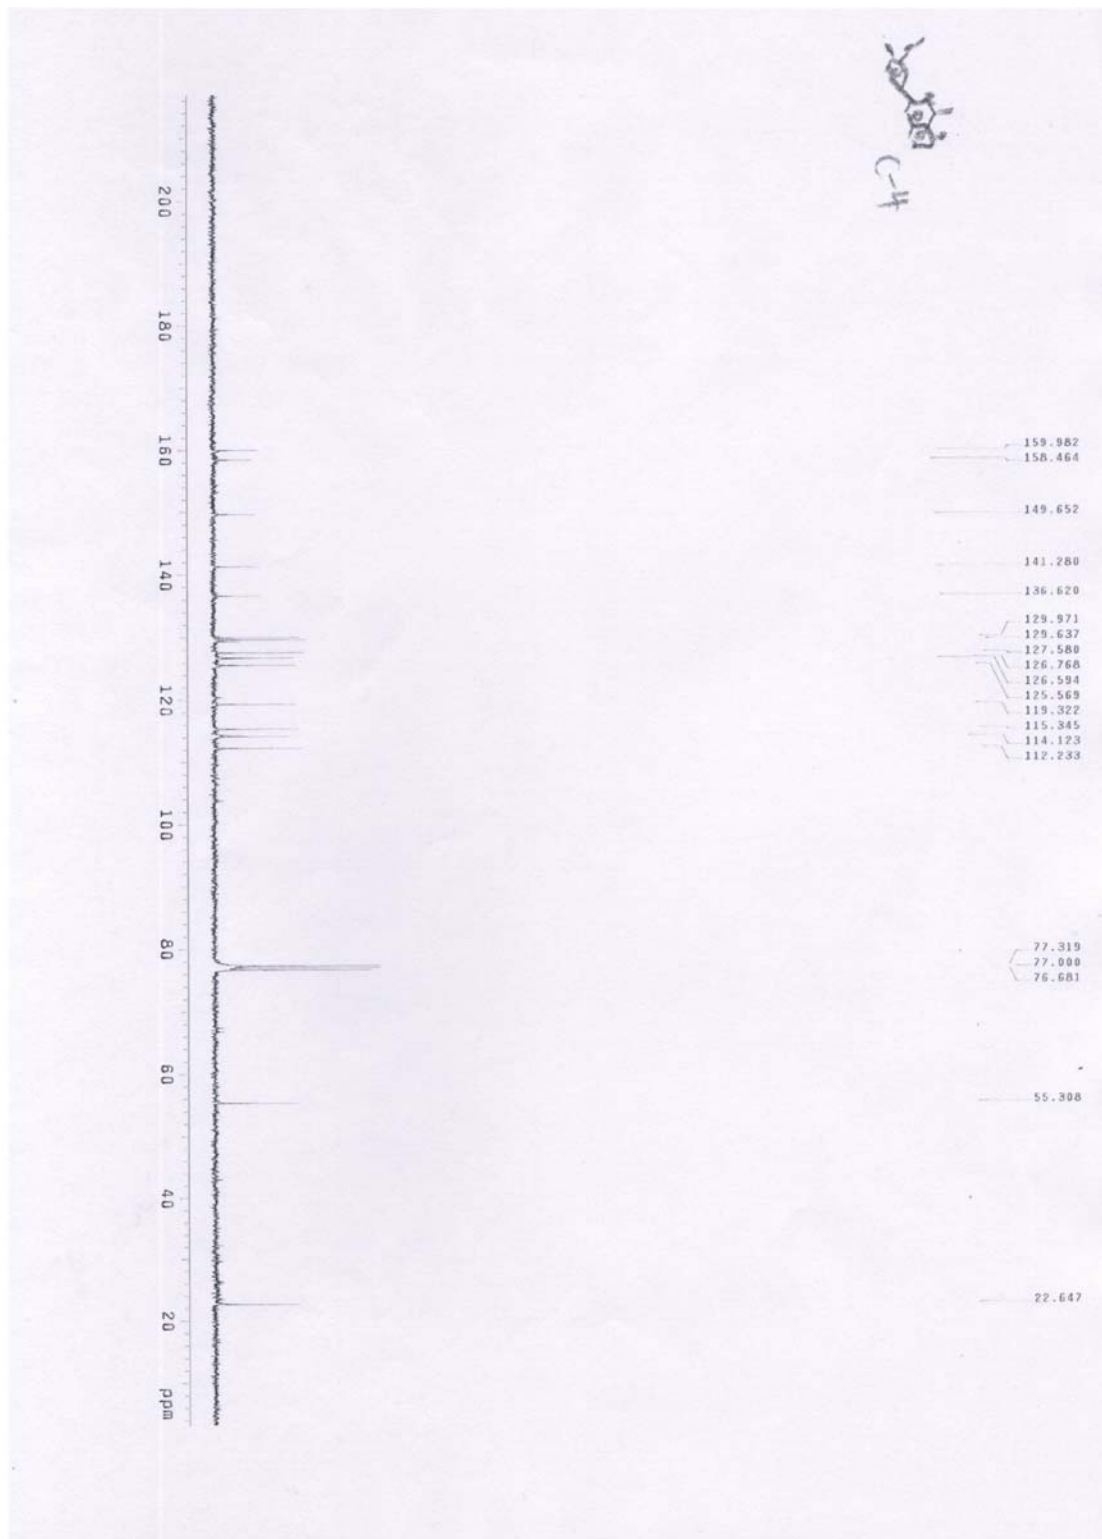

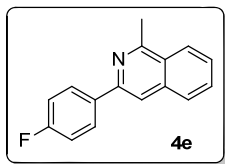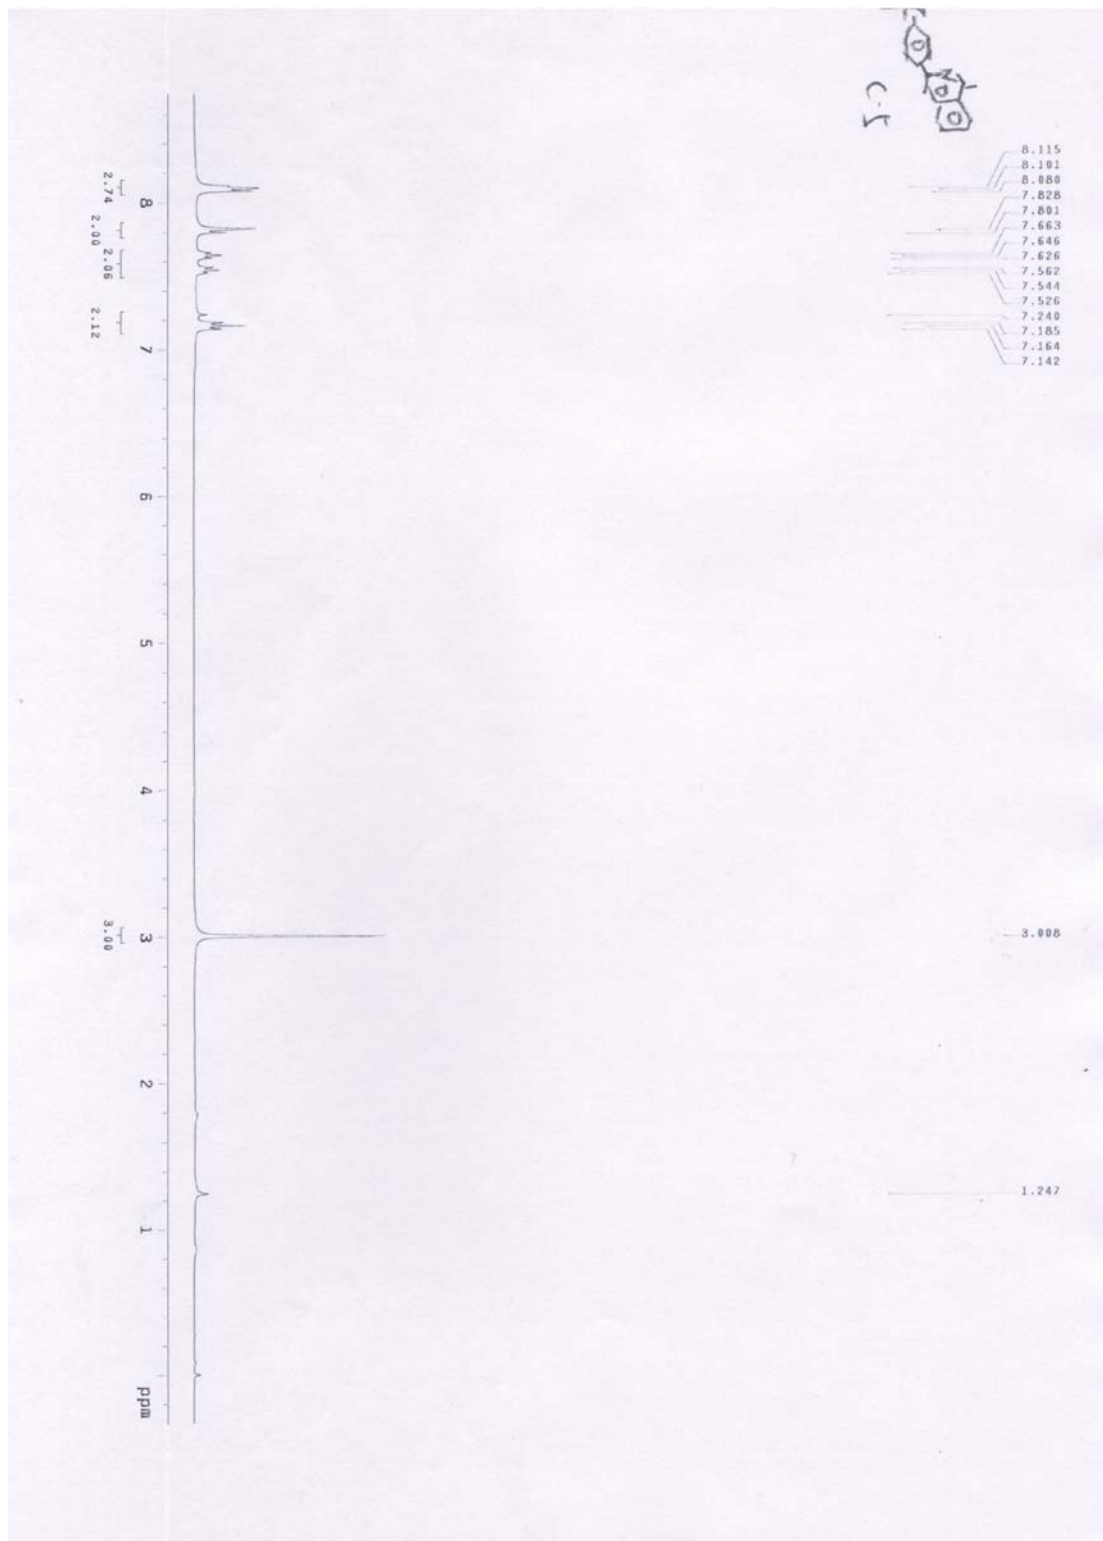

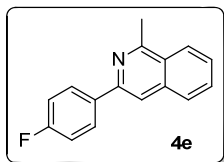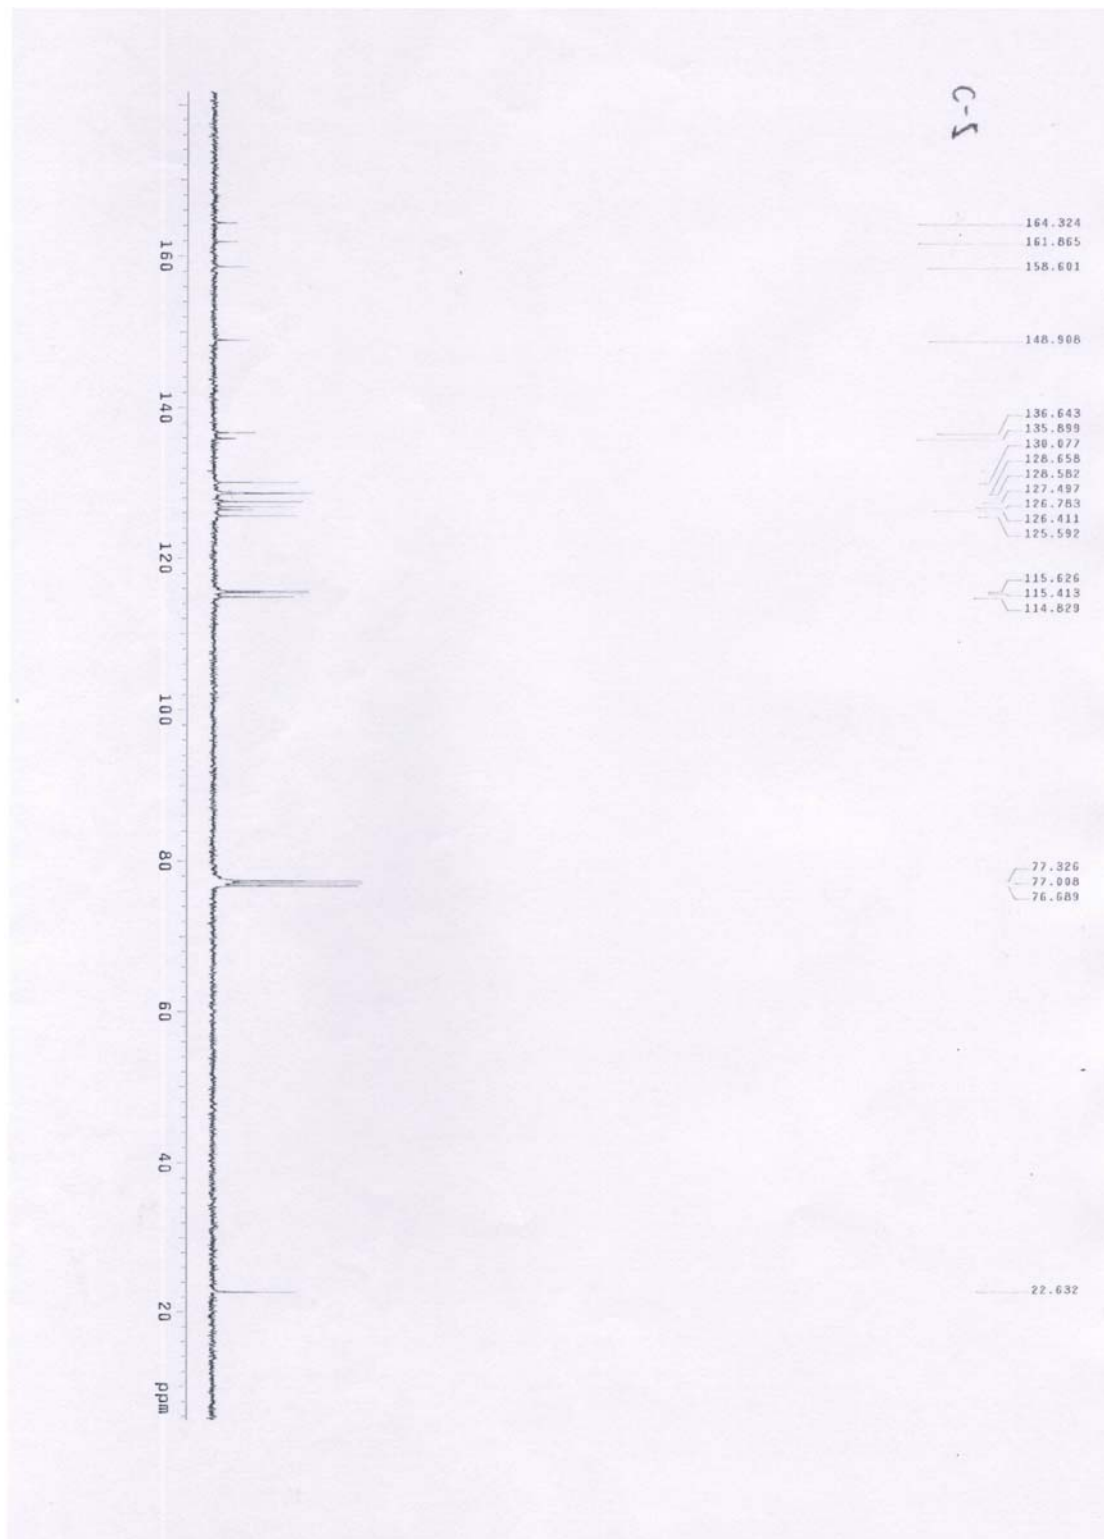



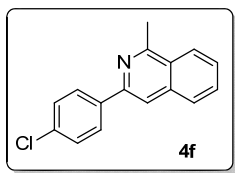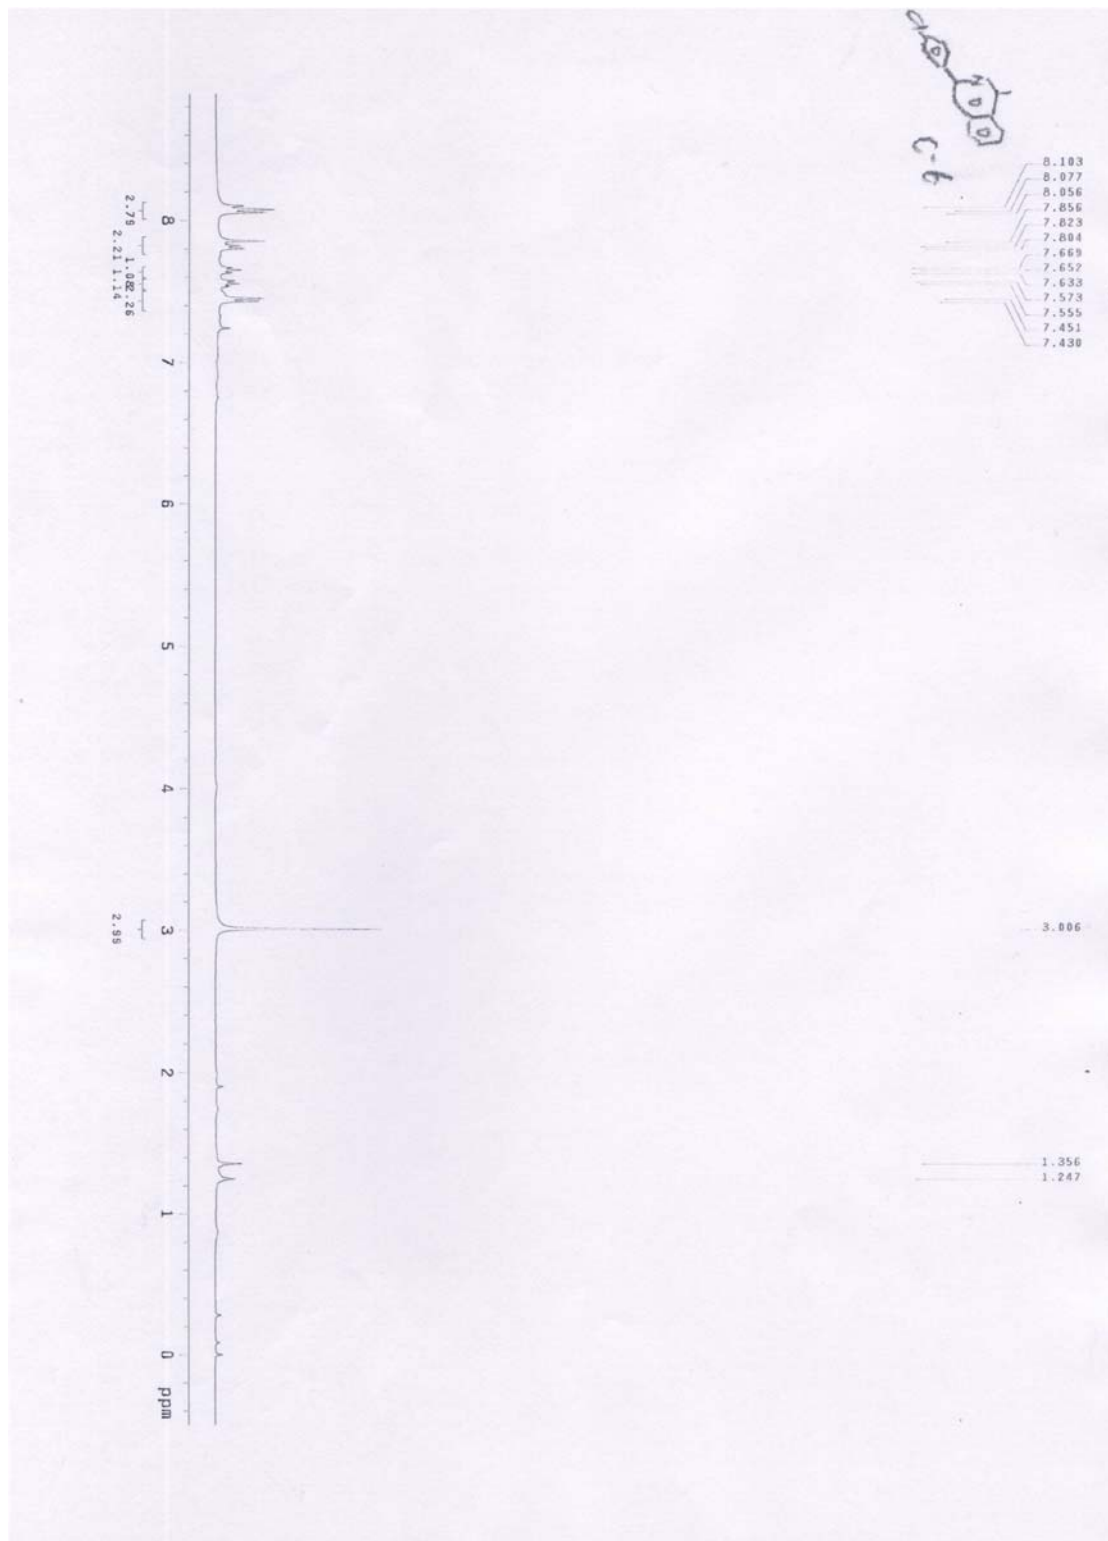

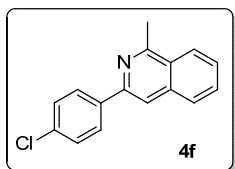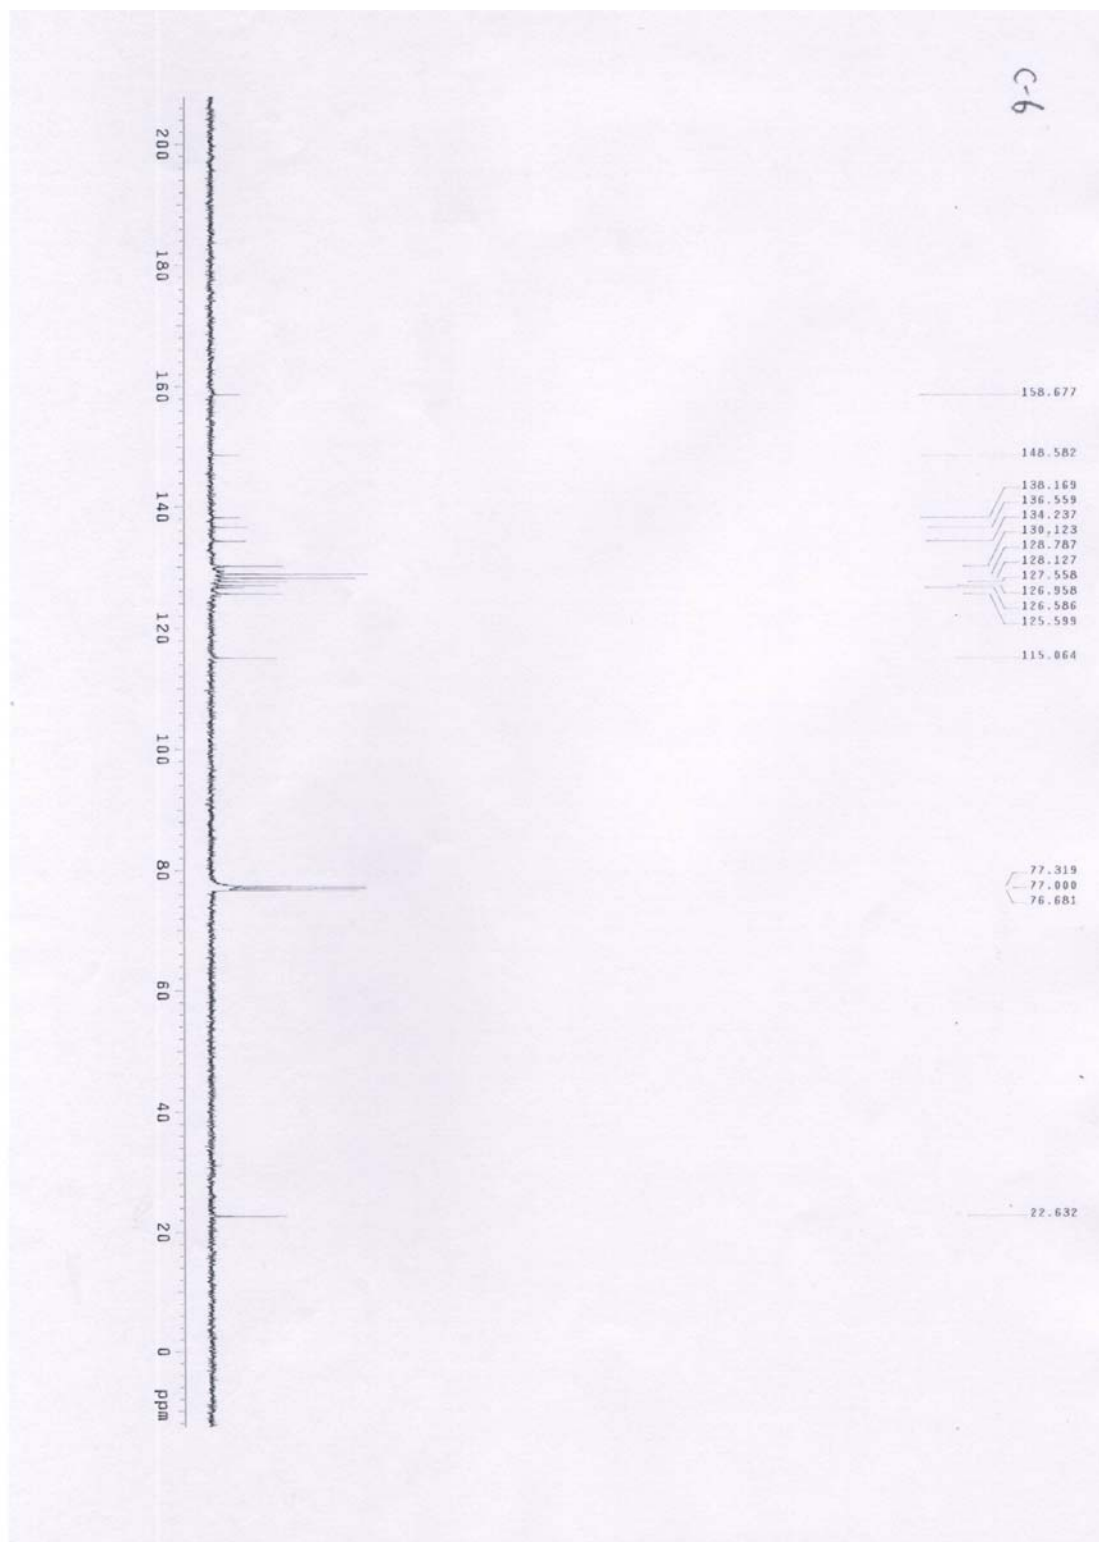

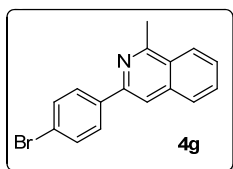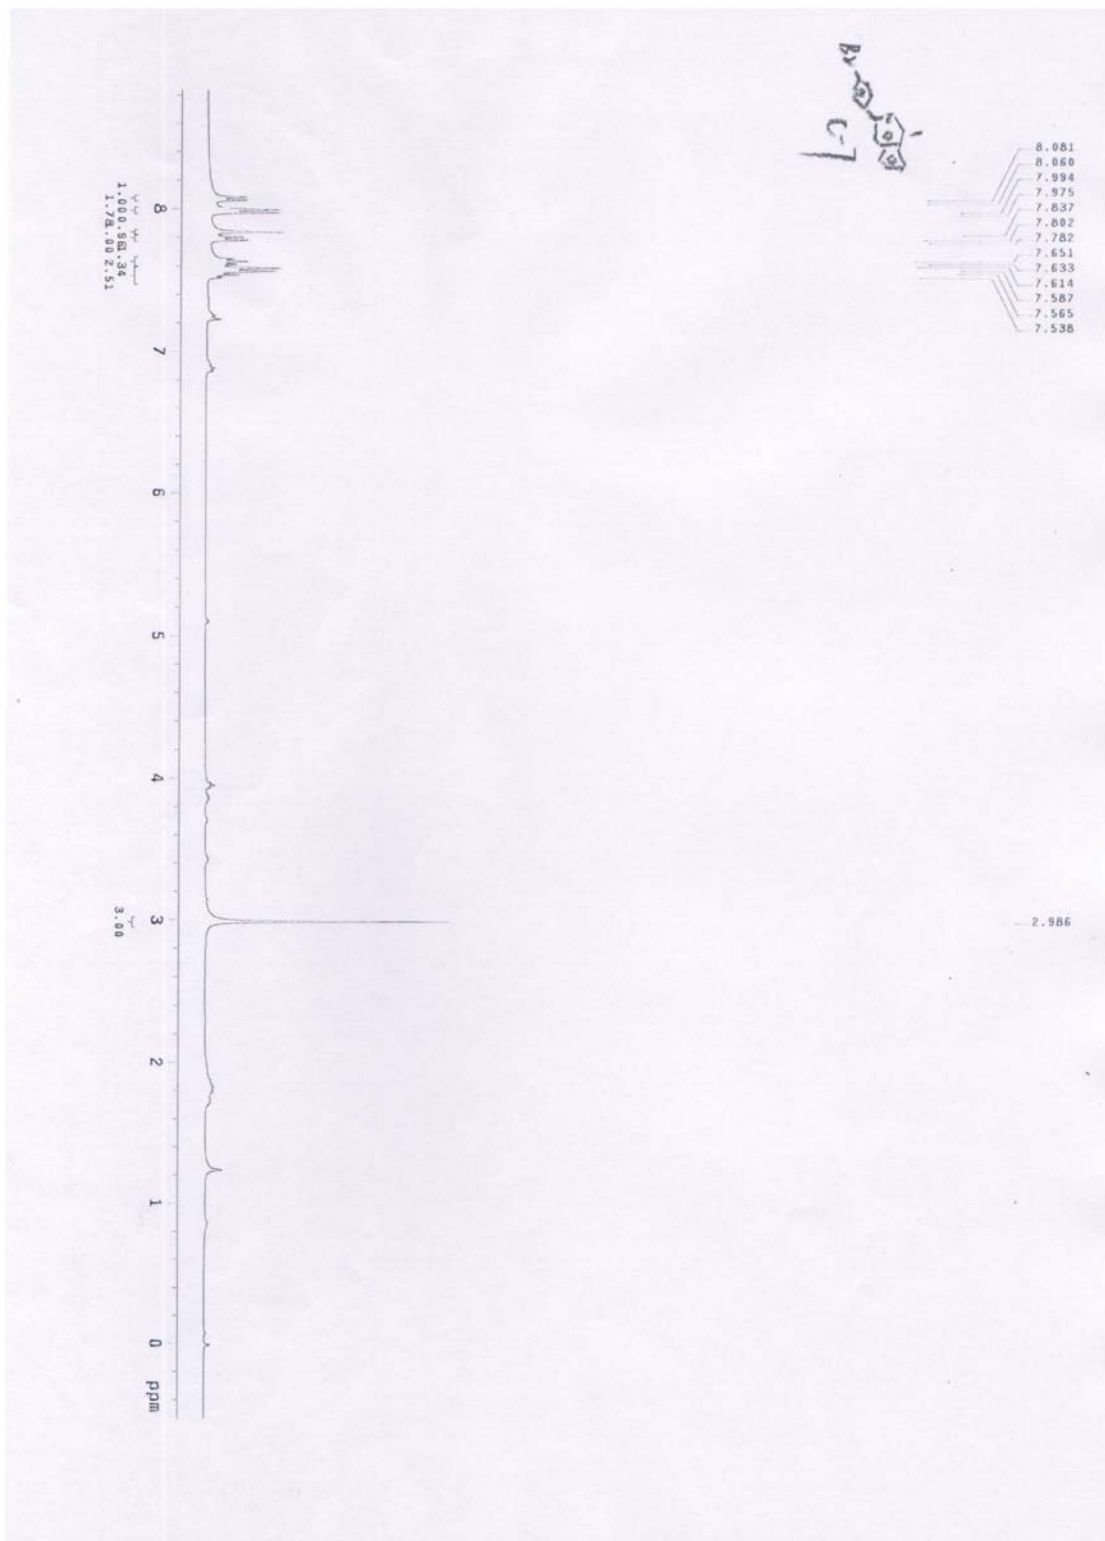

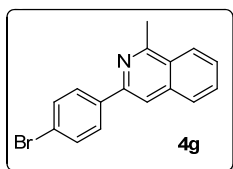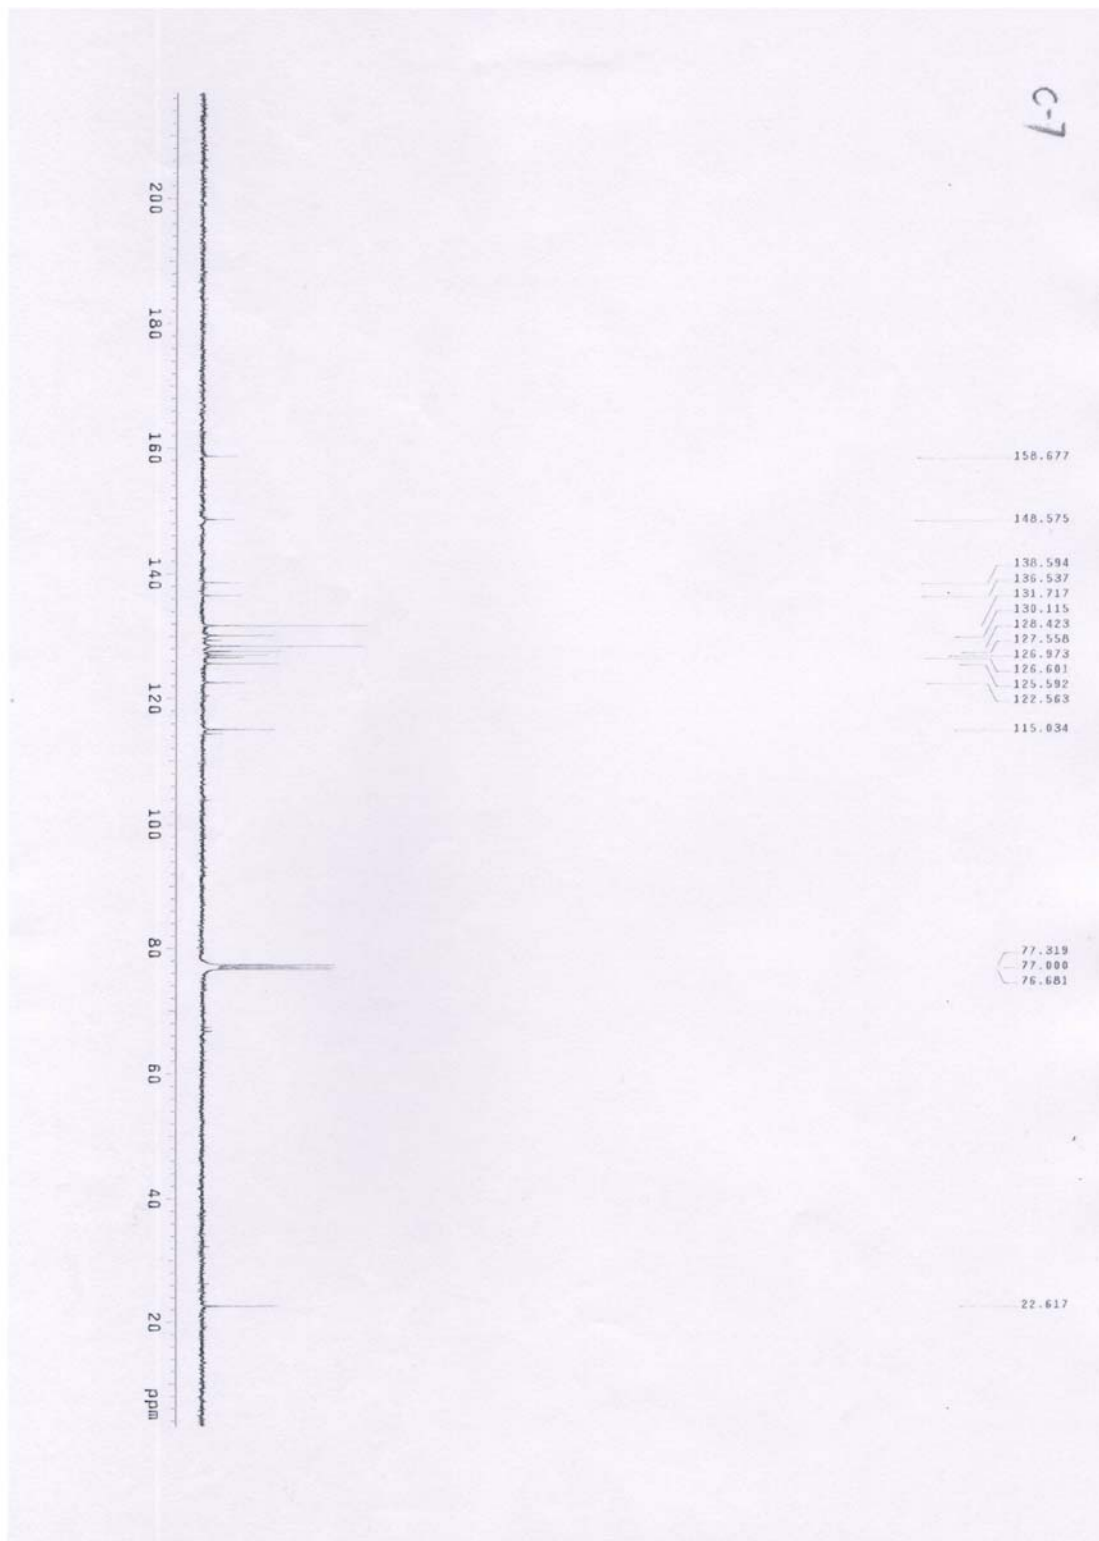

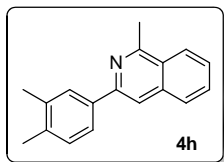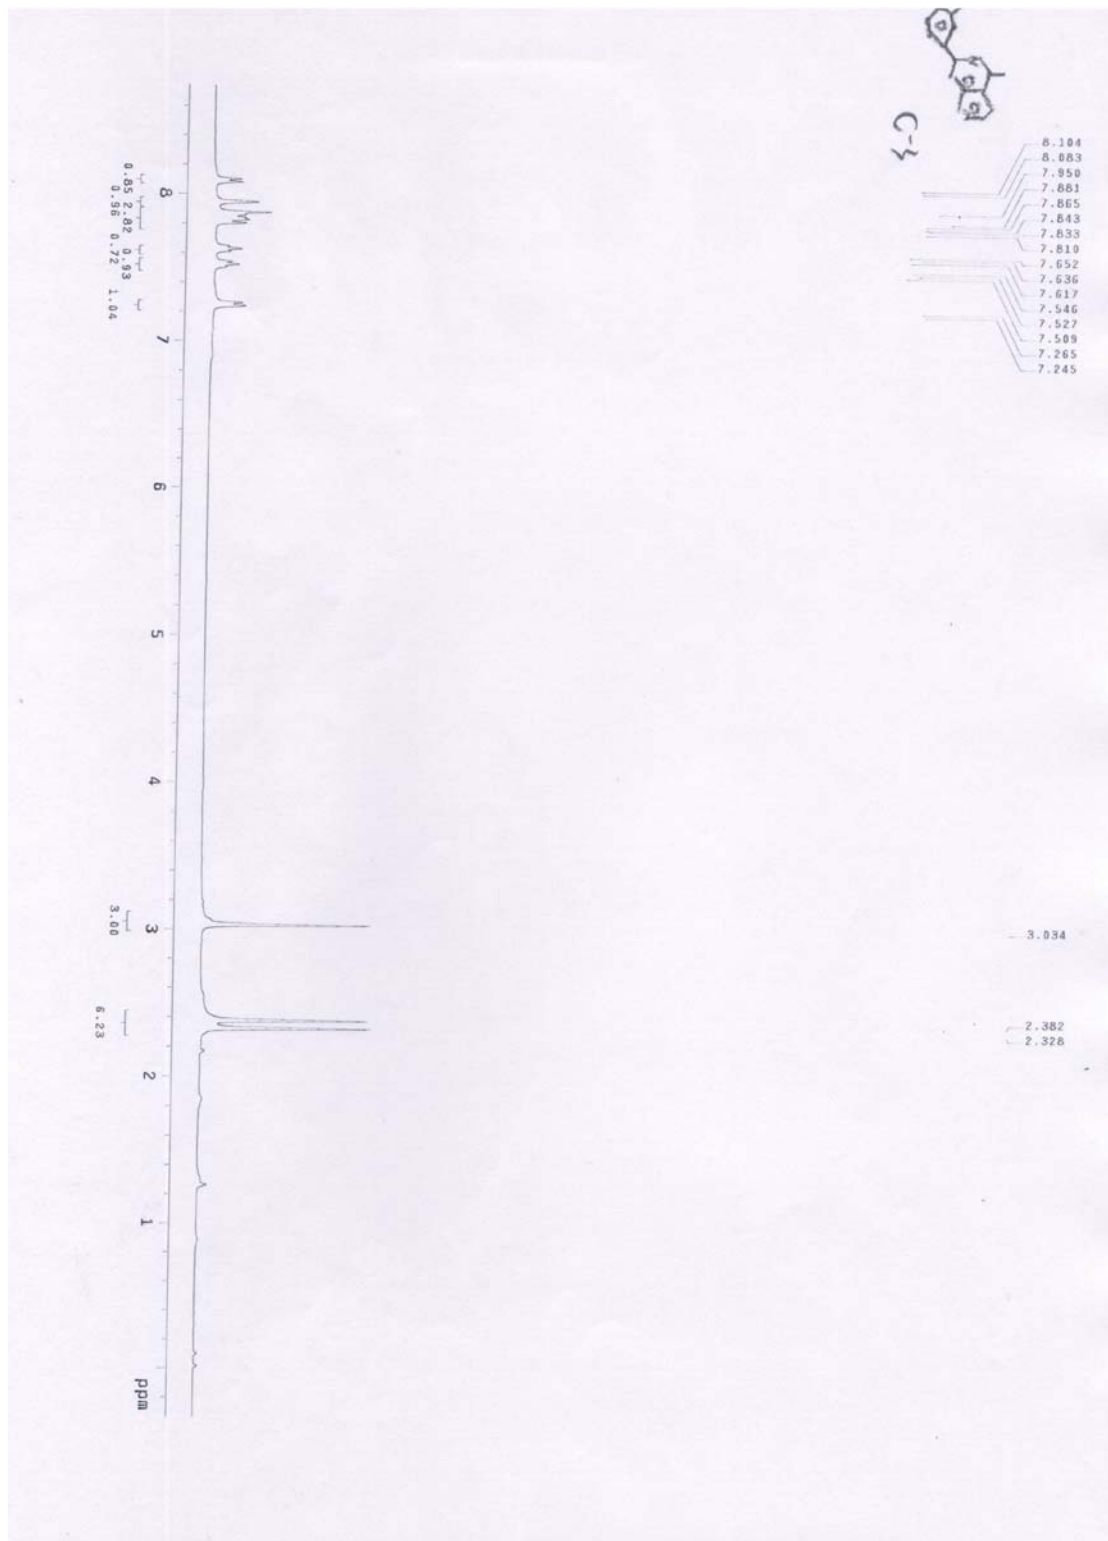

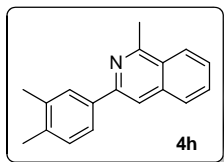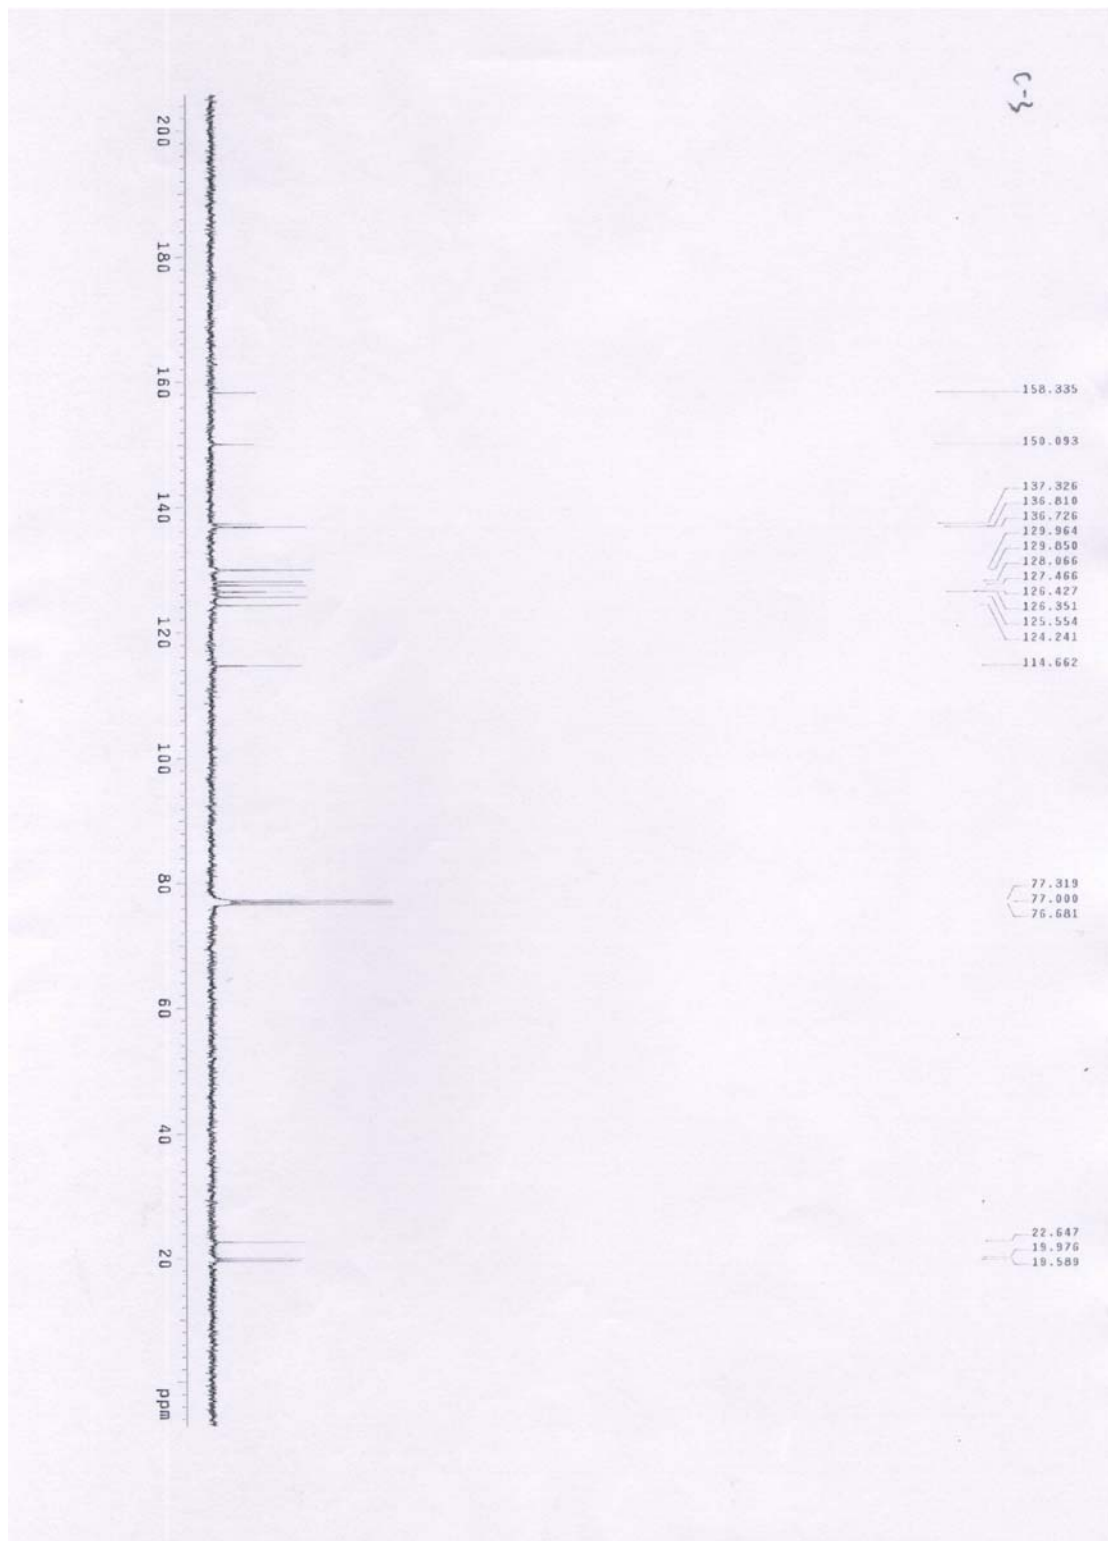



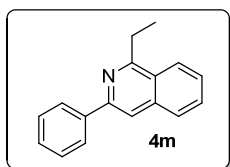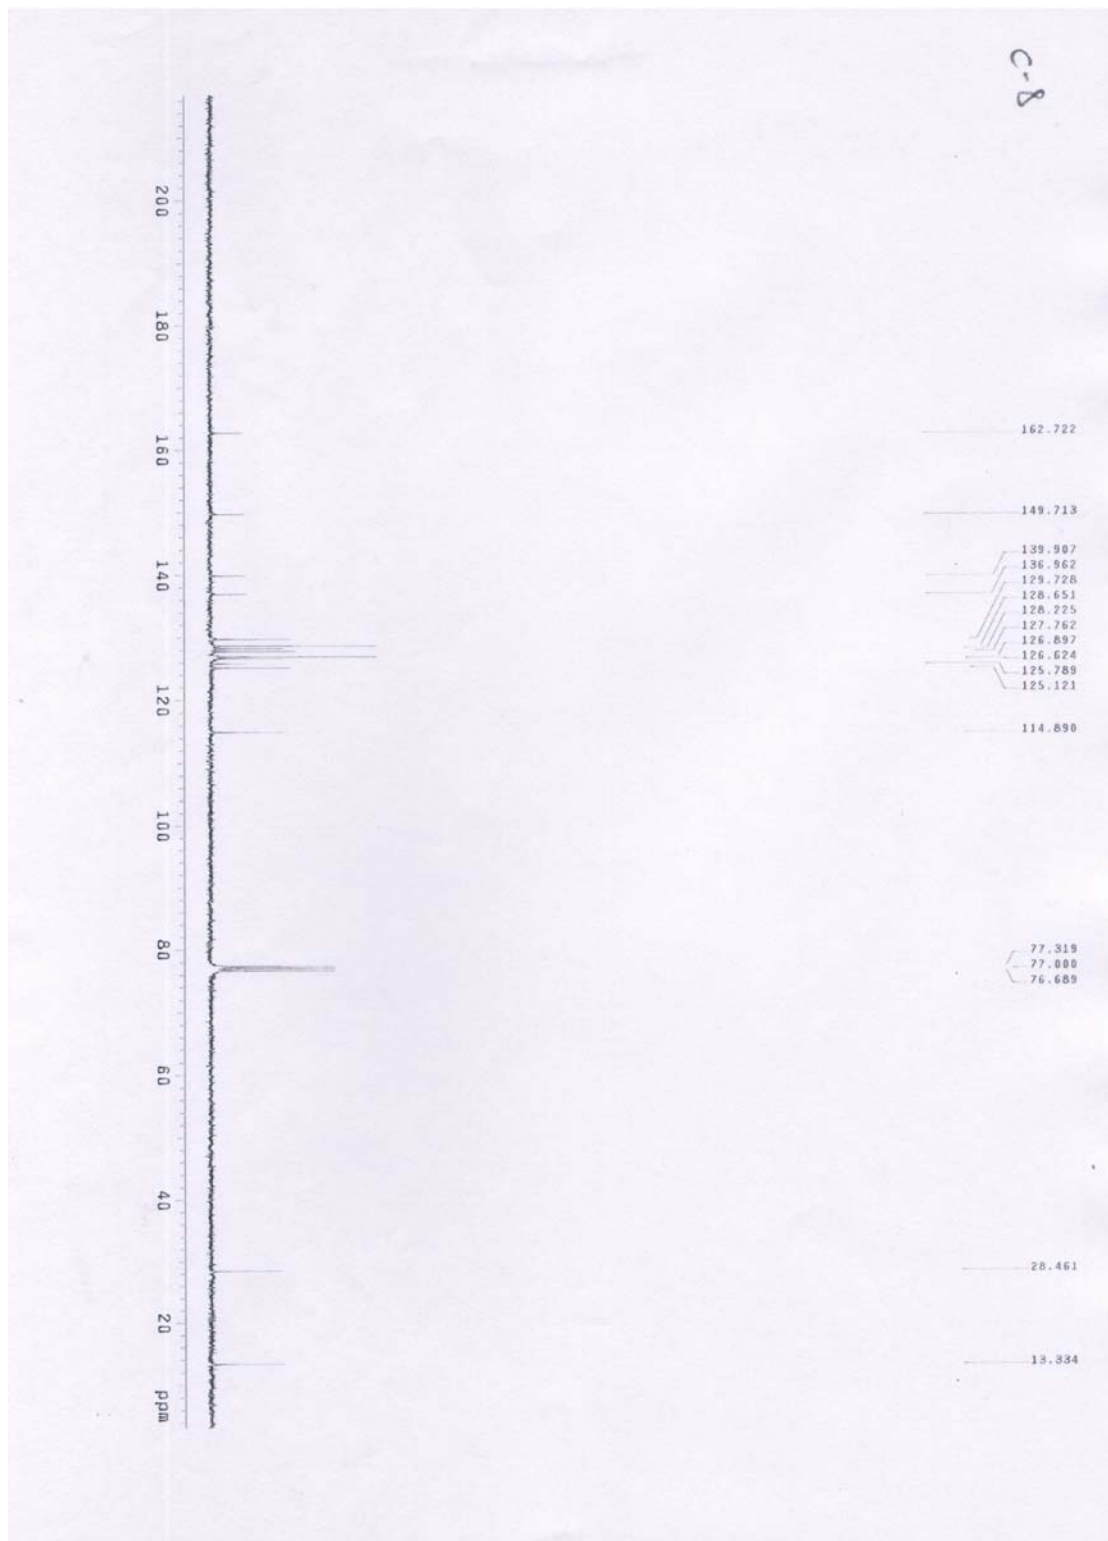



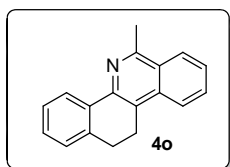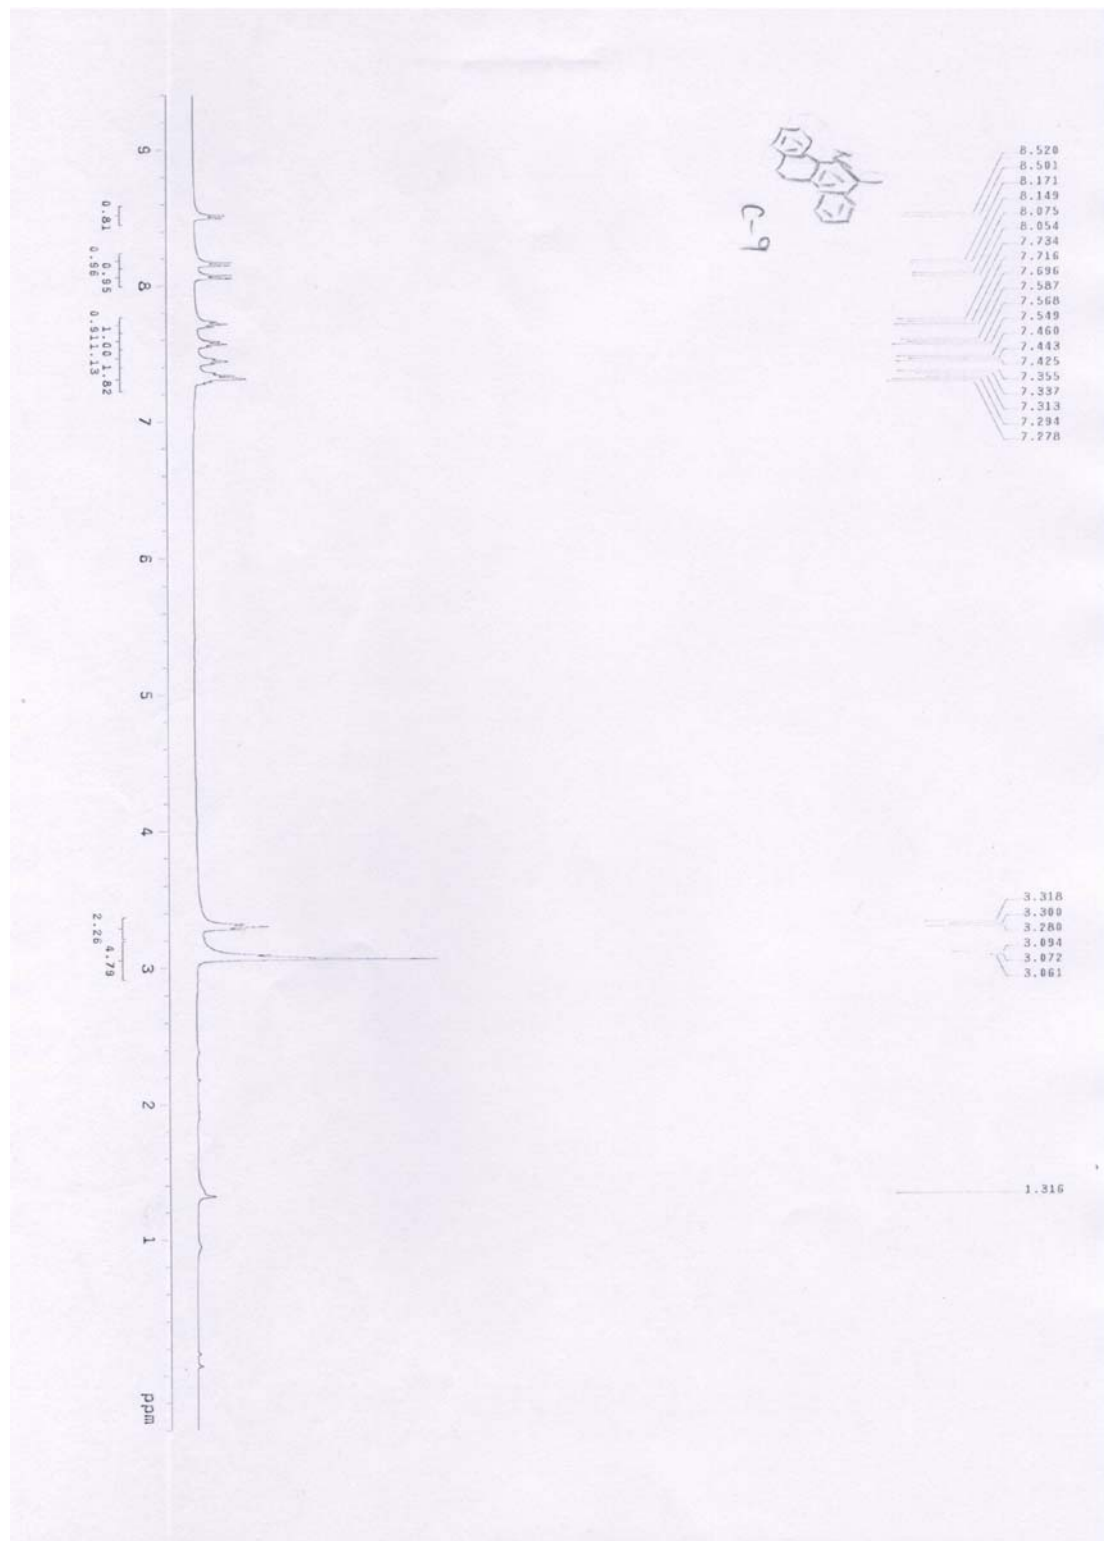

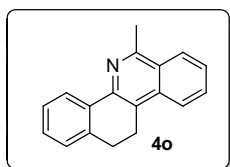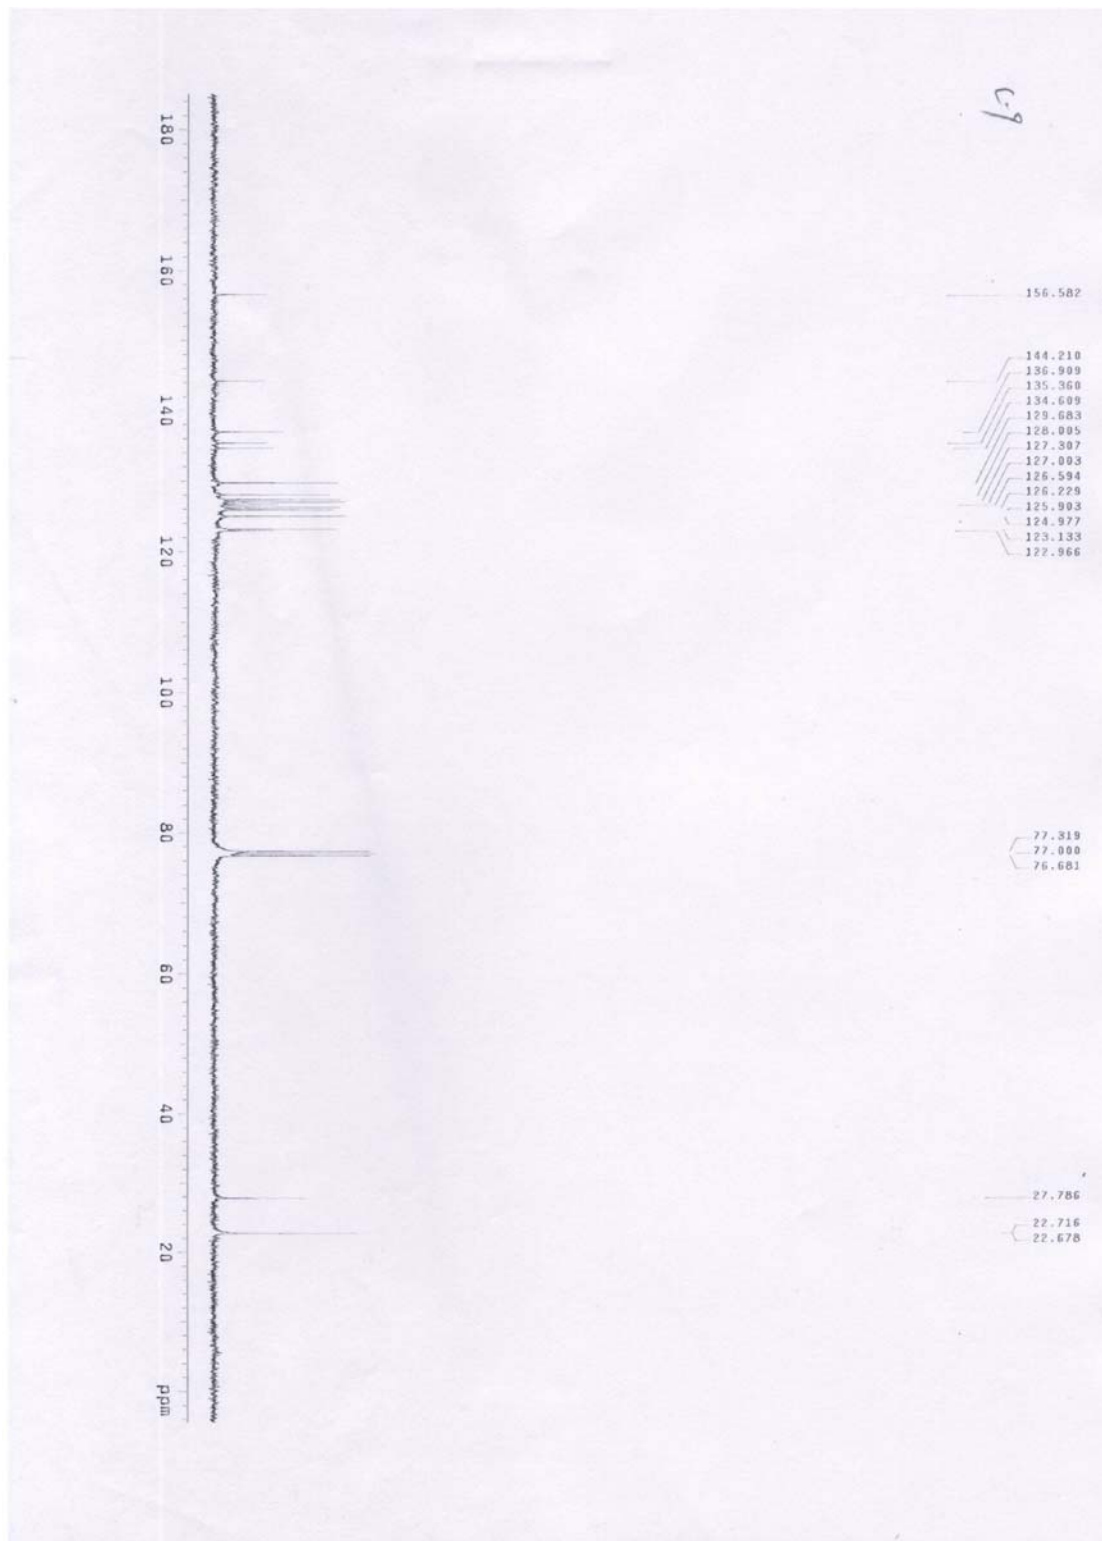

Supplement: c2cc33768a.pdf [file c2cc33768a.pdf]
